# Supplementary material
Source: publisher figshare collection journal article supplement (https://gsapubs.figshare.com/ndownloader/files/23316455)
Supplement: Supplementary file 1 [file 23316455]

## Sheet: DR Table 2A Basement
DR Table 2A. Feldspar Pb-isotope compositions from basement samples
See Appendix DR1 for a detailed description of the Pb isotope analytical method and Table DR1 for sample descriptions and references.
Filename	Name	Mineral		206/204	+/-1s	207/204	+/-1s	208/204	+/-1s		CPS->	Hg202	Pb204	Pb206	Pb207	Pb208	Th232	U238	Na23	Mg24	Al27	Si29	P31	K39	Ca43	Ti47	Fe56	Ba137
											background gas corrected
Charcot	Cape Charcot	orthogneiss
MY24A043	5893	plagioclase		16.5858	0.103321	15.4981	0.0807302	37.9311	0.2267			8132.61	6317.52	103608	100245	242971	2.97701	2.52958	3.34547e+08	290155	5.11922e+08	1.99046e+07	3657.36	2.83244e+07	354358	24555.8	5.73565e+06	475684
MY24A044	5893	plagioclase		16.5538	0.12322	15.4022	0.103131	37.6243	0.248046			6965.58	6842.72	112009	107899	261031	3.34821	1.40652	3.40023e+08	174557	5.12893e+08	2.01384e+07	3559.31	2.81984e+07	357121	23307.9	8.16972e+06	535639
MY24A045	5893	plagioclase		16.4861	0.116554	15.3636	0.103521	37.5606	0.25126			8182.49	6524.8	106372	102621	248471	3.63866	16.0714	3.44379e+08	1.4534e+06	5.24405e+08	2.0607e+07	4219.67	2.39872e+07	373109	27417	1.11123e+07	418821
MY24A047	5893	plagioclase		16.4569	0.109755	15.3667	0.111518	37.5413	0.248561			6714.27	6710.78	109219	105553	255403	4.82196	0.804108	3.38832e+08	67596.3	5.27916e+08	2.07219e+07	4311.06	4.37237e+07	363734	24528.8	5.79922e+06	983522
MY24A048	5893	plagioclase		16.767	0.116999	15.6349	0.0893628	38.2079	0.243347			5731.25	6034.12	100060	96559.1	233719	0.498638	25.9508	3.482e+08	709635	5.29377e+08	2.0578e+07	4448.32	2.10516e+07	378851	25747	8.45174e+06	397507
MY24A049	5893	plagioclase		16.509	0.0640404	15.3285	0.0718618	37.513	0.160103			4672.69	7125.3	116341	111779	270954	3.6912	18.3036	4.18226e+08	830743	6.41273e+08	2.51407e+07	4756.39	2.08434e+07	447033	33478.2	9.63102e+06	386049
MY24A050	5893	plagioclase		16.5944	0.105386	15.4207	0.0921808	37.6628	0.259492			5286.36	7092.77	116414	111931	270785	5.26839	12.6345	3.57588e+08	2.08168e+06	5.43418e+08	2.20956e+07	3983.47	3.18637e+07	374111	31161.7	1.20375e+07	513832
MY24A051	5893	plagioclase		16.4153	0.0725473	15.2965	0.0642633	37.3048	0.141989			5712.26	7050.28	114471	110357	266595	3.41179	1.17965	3.37443e+08	217761	5.08833e+08	1.99226e+07	3694.68	2.80451e+07	355529	25004.3	6.21452e+06	606333
MY24A053	5893	plagioclase		16.7322	0.0994082	15.594	0.0910044	38.0584	0.215875			5452.36	6168.22	102091	98416.5	237938	3.63866	0.134466	3.11527e+08	77506	4.77367e+08	1.86133e+07	6585.31	2.40719e+07	345471	30886.3	5.26657e+06	552322
MY24A054	5893	plagioclase		16.6246	0.0946611	15.5246	0.0872807	37.9711	0.237755			6383.97	6413.95	105479	101876	246842	2.58982	10.1791	3.3012e+08	384428	5.07696e+08	1.96966e+07	4044.99	2.61469e+07	361927	28526.5	8.18333e+06	489391
MY24A055	5893	plagioclase		16.356	0.0904746	15.2159	0.0920145	37.2366	0.222976			5823.51	6266.04	101385	97541.8	236478	6.31723	0.1	3.17833e+08	123888	4.82593e+08	1.87273e+07	3846.88	2.22464e+07	348246	22685.4	6.42938e+06	483201
MY24A056	5893	plagioclase		16.7365	0.0625836	15.5845	0.0518551	38.0773	0.143931			5992.04	7108.73	117701	113335	274331	1.25054	1.1833	3.61683e+08	88424.3	5.54408e+08	2.17784e+07	4288.37	3.636e+07	383691	28590.1	7.80314e+06	587319
Charcot	Cape Kennedy West	felsic gneiss
JN07A015	6103	plagioclase		15.9464	0.088597	15.2777	0.0651804	37.1632	0.171976			7820.26	5601	91273.8	88857.9	216244	12.1881	468.542	5.31466e+08	485302	8.61271e+08	3.42464e+07	6937.86	6.26336e+07	537808	24720.5	9.09725e+06	1.27718e+06
JN07A016	6103	plagioclase		15.9173	0.0925703	15.2819	0.0836659	37.098	0.195295			9183.68	6281.99	102178	99673.3	242077	7.37151	1479.4	6.53835e+08	3.41522e+06	1.05805e+09	4.16786e+07	10957	3.24087e+07	691279	31297.5	1.99618e+07	426814
JN07A017	6103	plagioclase		15.7307	0.0762453	15.1318	0.0849208	36.6479	0.149952			8231.27	5959.94	95797.1	93620	226850	15.4545	430.315	5.68902e+08	4.4177e+06	9.37286e+08	3.73745e+07	12439.9	6.46276e+07	594065	26772	2.51092e+07	1.13839e+06
JN07A019	6103	plagioclase		15.8905	0.0926739	15.2168	0.0837714	36.8889	0.241542			7500.73	6106.8	99142.2	96436.2	233905	16.2005	204.569	6.22196e+08	970480	1.0302e+09	4.08852e+07	8550.59	6.61483e+07	657066	32291.8	1.45978e+07	1.2132e+06
JN07A021	6103	plagioclase		15.8467	0.0912368	15.2484	0.101357	37.0663	0.227486			6620.84	4942.4	80007.6	78186.9	190166	23.565	54.3835	5.45873e+08	1.08247e+06	8.49531e+08	3.3918e+07	6676.46	2.89682e+07	538352	41284.4	1.41385e+07	489334
JN07A022	6103	plagioclase		15.7888	0.112062	15.1815	0.115386	36.9533	0.307284			5987.33	5744.52	92646.4	90463.8	220326	9.88351	29.7414	5.89512e+08	1.31454e+06	9.26525e+08	3.71923e+07	7211.78	3.85796e+07	584415	38829	1.56251e+07	611455
JN07A023	6103	plagioclase		16.1066	0.106493	15.4016	0.108171	37.4234	0.226121			6454.55	5218.42	85850.7	83358.3	202668	20.1625	259.143	5.69856e+08	1.15851e+06	9.01836e+08	3.61977e+07	8114.73	5.31406e+07	554408	41852	1.48116e+07	1.11571e+06
JN07A024	6103	plagioclase		15.7981	0.0992797	15.1613	0.109405	36.9452	0.259213			6989.97	5659.72	91321.4	88984.6	216970	31.8001	17.5151	5.49912e+08	1.20721e+06	8.95636e+08	3.54698e+07	7774.6	3.86031e+07	590336	46578.2	1.51068e+07	694428
JN07A025	6103	plagioclase		15.7682	0.0514645	15.1668	0.0501624	36.8921	0.123692			5973.94	9688.34	156019	152357	370829	138.693	108.77	4.53377e+08	5.20329e+06	9.33349e+08	3.9199e+07	8132.34	3.12447e+08	469973	35722.6	2.35783e+07	8.89132e+06
Charcot	Possession Rocks	granite gneiss
JN07A051	6100	K feldspar		17.2919	0.0435985	15.6458	0.0411076	38.8501	0.0922682			4806.95	42969	757689	695011	1.72686e+06	19.1218	28.6456	9.88053e+07	31431.9	7.29606e+08	3.91421e+07	10896.6	9.93748e+08	16911.9	28766	494316	7.1058e+06
JN07A052	6100	K feldspar		17.2678	0.0670786	15.65	0.0552256	38.746	0.117009			4703.11	51480.9	906466	832840	2.06319e+06	1865.95	856.068	1.21184e+08	73692.9	8.8468e+08	4.98386e+07	65659	1.28981e+09	21966.4	32290.3	816725	8.42644e+06
JN07A053	6100	K feldspar		17.3039	0.0570384	15.6711	0.0553974	38.9067	0.136933			4517.87	43217	762508	700033	1.73902e+06	354.246	100.574	1.00933e+08	23500.4	7.87495e+08	4.22289e+07	9984.04	1.08759e+09	15530.6	26170.8	397697	6.93096e+06
JN07A054	6100	K feldspar		17.2706	0.0641241	15.6684	0.0736358	38.925	0.155408			4074.93	40180.3	707527	650678	1.61743e+06	1178.63	115.533	1.21534e+08	31724.6	7.11249e+08	3.85028e+07	19136.1	9.51789e+08	15686.3	27172.1	471279	6.13449e+06
JN07A055	6100	K feldspar		17.331	0.0429403	15.7121	0.0382064	39.0224	0.0987794			4194.73	45799.9	809256	743692	1.84807e+06	9.02326	47.6731	1.53197e+08	32092.7	8.56683e+08	4.73136e+07	12117.8	1.17065e+09	29274.5	41318.2	762419	7.31759e+06
JN07A056	6100	K feldspar		17.2641	0.0409427	15.6651	0.0409243	38.9572	0.095774			3938.24	46176.7	812720	747507	1.85999e+06	9463.65	1295.69	1.28353e+08	84332.1	8.95535e+08	4.96627e+07	48818.5	1.28426e+09	25029	33800	820544	7.2607e+06
JN07A057	6100	K feldspar		17.2505	0.0249926	15.681	0.0342749	38.8805	0.0679599			3882.8	40959.5	720293	663671	1.64643e+06	3.77312	29.2229	1.2687e+08	27114.6	7.88765e+08	4.27014e+07	12493.5	1.05285e+09	25600.7	39596	760176	6.54519e+06
JN07A058	6100	K feldspar		17.2825	0.0353577	15.6798	0.0408994	38.8931	0.105899			3623.17	41226.6	726298	667898	1.65755e+06	152.878	35.2492	1.03399e+08	23925.7	7.1179e+08	3.82095e+07	10346.1	9.61271e+08	21799.9	31324.7	610459	7.00647e+06
JN07A059	6100	K feldspar		17.3234	0.0409632	15.6976	0.0363554	38.9782	0.0848785			3596.18	60408.3	1.06668e+06	979698	2.43386e+06	76.588	51.7286	1.12394e+08	28836.3	9.01371e+08	5.019e+07	11067	1.31807e+09	18539.4	29134.3	420706	9.37376e+06
JN07A060	6100	K feldspar		17.2787	0.0540358	15.6762	0.0619764	38.9929	0.118229			3741.57	54907	966989	889198	2.21284e+06	103.784	111.076	8.78105e+07	27580.2	8.08638e+08	4.3355e+07	16259.4	1.15056e+09	19793.6	31608	405529	9.54924e+06
Charcot	Watson Bluff	syenite
JN07A061	6024	K feldspar		16.8217	0.0230916	15.5937	0.0274982	37.7523	0.0723159			4089.13	43673.8	748775	703513	1.70397e+06	8.32861	27.8779	1.73822e+08	144422	8.0169e+08	4.3065e+07	1691.46	1.00557e+09	31186.7	40176.2	6.11322e+06	1.5345e+07
JN07A062	6024	K feldspar		16.8313	0.0801446	15.6162	0.0658929	37.7334	0.164357			3927.42	26520.9	454929	427796	1.03413e+06	29.5953	46.3738	2.42358e+08	432606	7.74436e+08	4.11527e+07	4393.05	8.49585e+08	61857.5	28376.3	1.11963e+07	1.26172e+07
JN07A063	6024	K feldspar		16.8401	0.0330522	15.5825	0.0418705	37.821	0.0937265			2780.78	49611.1	851415	798472	1.9388e+06	2153.02	501.43	2.28429e+08	573729	8.70402e+08	4.91948e+07	3274.58	1.08797e+09	40097	35931.6	1.65584e+07	2.03731e+07
JN07A064	6024	K feldspar		16.7979	0.0390795	15.6144	0.0330766	37.7404	0.089798			3712.51	37381.4	639887	602835	1.45762e+06	200.238	100.84	1.79749e+08	83050.9	7.71067e+08	4.09124e+07	4430.79	9.32429e+08	31947.8	40965.3	4.96426e+06	1.50124e+07
JN07A065	6024	K feldspar		16.8039	0.0437709	15.5736	0.0424693	37.717	0.0947253			4071.71	41375.1	708470	665456	1.61221e+06	1.02732	42.7685	1.75237e+08	68629.4	7.83838e+08	4.18184e+07	2992.72	9.64865e+08	36862.4	41212.1	3.72639e+06	1.66084e+07
JN07A066	6024	K feldspar		16.7811	0.041771	15.5193	0.0305577	37.6625	0.0812465			3734.92	37577.4	642536	602232	1.46199e+06	23.411	149.497	2.30717e+08	179700	8.47768e+08	4.60377e+07	4024.28	1.0038e+09	47511.6	66006.2	7.65434e+06	1.75295e+07
JN07A067	6024	K feldspar		16.7936	0.0430108	15.5881	0.0542377	37.6764	0.114959			3899.31	34394.6	588521	553635	1.33855e+06	62.3448	39.0626	2.79262e+08	705811	8.59269e+08	4.68155e+07	2587.68	9.69637e+08	45731.5	57221	1.51746e+07	1.57714e+07
JN07A068	6024	K feldspar		16.8525	0.0393531	15.5682	0.0291529	37.735	0.0860757			4164.4	41631.6	714816	669237	1.62258e+06	74.9548	80.9747	1.69604e+08	18605.8	8.1754e+08	4.37456e+07	3039.62	1.03695e+09	31582.9	48445	2.53296e+06	1.68733e+07
JN07A069	6024	K feldspar		16.6864	0.0358488	15.472	0.0351658	37.5026	0.07497			4020.14	30091.5	511554	480710	1.16549e+06	33.1029	22.2327	2.76841e+08	436186	8.42437e+08	4.45988e+07	2231.44	8.99501e+08	79794.8	38398.8	1.21113e+07	1.35461e+07
JN07A070	6024	K feldspar		16.7896	0.0517573	15.5491	0.0511556	37.6381	0.130953			3953.07	34640.6	592502	556113	1.34642e+06	89.1975	33.7726	2.42709e+08	35714.4	8.42789e+08	4.50602e+07	5243.78	9.69866e+08	54236.1	50038.5	5.43218e+06	1.5653e+07
Charcot	Cape Harrison	granite gneiss
MY24A057	6006	K feldspar		17.4084	0.0182908	15.7194	0.0198022	39.1468	0.0399057			6736.61	60117.8	1.03538e+06	966704	2.38508e+06	110.994	158.218	8.38684e+07	5994.11	4.96103e+08	2.59214e+07	2123.68	7.7335e+08	9919.56	22752.6	1.08058e+06	8.44398e+06
MY24A058	6006	K feldspar		17.4043	0.0450363	15.7294	0.0336553	39.2275	0.0701367			5694.47	76937	1.32479e+06	1.23789e+06	3.05858e+06	75.7456	129.901	1.04288e+08	258300	5.52176e+08	2.97695e+07	2921.06	8.7633e+08	11506.3	27748.4	4.77799e+06	1.06168e+07
MY24A059	6006	K feldspar		17.3972	0.0376344	15.7001	0.0350153	39.1968	0.074156			5451.42	56360.7	970123	905086	2.23877e+06	2381.19	3547.04	1.24471e+08	118093	5.81919e+08	3.14841e+07	35318.2	8.94352e+08	30214.5	20768.7	2.64116e+06	8.57608e+06
MY24A060	6006	K feldspar		17.3583	0.0343395	15.6594	0.0317138	39.0674	0.0913635			5447.43	54940.5	943599	879955	2.1751e+06	594.051	1853.28	6.60121e+07	381676	4.85631e+08	2.51643e+07	2047.39	7.66267e+08	8796.1	18207.8	4.96054e+06	8.37454e+06
MY24A061	6006	K feldspar		17.4252	0.0232512	15.6902	0.0301556	39.1421	0.0606136			5349.76	46241.8	797289	742056	1.83418e+06	12.6357	103.712	8.80246e+07	36209.6	4.72489e+08	2.41102e+07	3540.42	6.93038e+08	17473.7	20263.1	1.48384e+06	7.81243e+06
MY24A062	6006	K feldspar		17.3498	0.0352741	15.6555	0.0270239	39.0295	0.0672538			5176.94	54329.3	932713	869873	2.14872e+06	188.285	1132.56	1.09405e+08	48770.7	5.3042e+08	2.77593e+07	2542.58	7.90763e+08	14408.5	20661.3	1.22791e+06	8.72823e+06
MY24A063	6006	K feldspar		17.3979	0.0545948	15.731	0.036985	39.1743	0.0901836			4129.49	67429.2	1.16086e+06	1.08478e+06	2.67667e+06	1305.54	1274.2	1.12857e+08	11878.9	5.76762e+08	3.13034e+07	39522.8	8.94085e+08	18846.9	23391	1.22851e+06	1.02745e+07
MY24A064	6006	K feldspar		17.3263	0.0590067	15.6801	0.0772208	39.0607	0.147909			4780.29	67656.6	1.16002e+06	1.08487e+06	2.67786e+06	117.845	204.161	8.38868e+07	11740	5.9528e+08	3.12367e+07	2833.93	9.40083e+08	14077.8	23650.4	1.43295e+06	1.04421e+07
MY24A065	6006	K feldspar		17.3486	0.0327338	15.68	0.0310609	39.1183	0.0837865			4218.11	54595.1	937311	875391	2.16403e+06	1641.12	1783.42	1.01492e+08	52742.1	5.48064e+08	2.91843e+07	2285.04	8.54382e+08	14790	21352.5	1.71011e+06	8.60158e+06
MY24A066	6006	K feldspar		17.3048	0.0556074	15.6647	0.0400437	39.1399	0.116064			4358.39	63463.6	1.08686e+06	1.01656e+06	2.5169e+06	141.852	184.306	8.9847e+07	11477.1	4.91259e+08	2.52517e+07	5953.95	7.34572e+08	12726.8	23463.1	1.01932e+06	8.83368e+06
Charcot	Chugunov Island	porphyritic rhyolite
JN07A095	6035	K feldspar		16.8051	0.0513074	15.4991	0.0515141	37.0172	0.13017			3376.54	19469.4	332932	311360	743001	121607	18791.1	4.37718e+08	35109.9	1.022e+09	5.90696e+07	26716.3	1.12079e+09	72224.9	111107	1.04277e+07	4.59277e+06
JN07A096	6035	K feldspar		17.1299	0.0934069	15.513	0.050048	37.5431	0.153992			3392.21	20445.7	356366	327267	791300	262702	31225.5	3.94074e+08	1.60915e+06	1.26175e+09	7.66925e+07	1.45049e+06	1.80214e+09	139098	94394.1	8.89321e+07	5.25091e+06
JN07A097	6035	K feldspar		16.966	0.113247	15.6202	0.100482	37.0885	0.210989			3331.82	8407.71	145137	135509	321443	25156.1	7990.81	7.32343e+08	514648	1.2134e+09	7.19199e+07	78142.2	1.13777e+09	83205.9	77489.7	2.32885e+07	4.63492e+06
JN07A099	6035	K feldspar		17.2701	0.09817	15.605	0.123105	38.006	0.305356			3180.05	4858.04	85357.4	78223.4	190307	100400	10778.8	6.49968e+08	402994	1.09935e+09	7.04104e+07	189058	1.06027e+09	70314.3	81824.1	4.13313e+07	4.5827e+06
JN07A100	6035	K feldspar		16.8016	0.0313944	15.4136	0.0348663	36.8248	0.0833506			3102.42	20186	345040	321048	766146	167243	26621.3	4.84521e+08	58242.7	1.05892e+09	6.08141e+07	32528.3	1.10507e+09	97440.4	987687	2.57093e+07	4.97435e+06
JN07A101	6035	K feldspar		17.4916	0.11613	15.5284	0.100081	38.3417	0.329405			3139.57	6212.94	110555	99551	245509	182202	13536.5	6.05494e+08	234643	1.1501e+09	6.92474e+07	345036	1.22851e+09	81008.2	76964	3.29842e+07	4.93581e+06
JN07A102	6035	K feldspar		16.7907	0.0343316	15.494	0.0515852	36.8643	0.116243			3098.39	17158.4	293073	274325	651869	31068.4	1803.71	4.5612e+08	146690	1.00873e+09	6.45869e+07	189486	1.11546e+09	75778.3	152116	1.51253e+07	5.13187e+06
JN07A103	6035	K feldspar		16.8824	0.0821713	15.483	0.0599065	37.0969	0.160743			2766.35	16670.5	286285	266341	637301	91184.1	7382.18	5.67221e+08	159252	1.34093e+09	8.41209e+07	152708	1.77781e+09	67693.9	70486.9	3.3708e+07	5.13659e+06
JN07A104	6035	K feldspar		16.9933	0.120299	15.3951	0.0894651	37.2751	0.349918			2624.62	9235.19	159632	146713	354733	122865	7065.28	6.68076e+08	320095	1.21565e+09	7.37397e+07	327553	1.31176e+09	90735.2	290883	4.48192e+07	6.84031e+06
Charcot	Chugunov Island	felsic gneiss
JN07A075	6118	K feldspar		16.269	0.0420448	15.46	0.0374784	37.9191	0.0993409			3441.6	48902.7	810309	780400	1.9142e+06	27.8929	11.0777	1.36654e+08	142340	8.06531e+08	4.3267e+07	167630	1.07755e+09	31035.6	28553.9	750548	8.01036e+06
JN07A076	6118	K feldspar		16.1916	0.0406634	15.425	0.0359494	37.8532	0.0998864			3588.24	44829.5	739245	713754	1.75158e+06	6.16125	16.2732	1.74664e+08	526170	8.88126e+08	4.88637e+07	32454.7	1.19917e+09	35391.8	39662.7	3.4652e+06	9.92368e+06
JN07A077	6118	K feldspar		16.2845	0.035925	15.4567	0.0371649	37.9267	0.0829024			3591.85	53393.8	885484	851825	2.09011e+06	16.0366	18.746	1.30546e+08	133700	8.34512e+08	4.51708e+07	220655	1.15092e+09	24115.3	28633.9	840801	9.5548e+06
JN07A078	6118	K feldspar		16.2616	0.03089	15.4682	0.0434356	37.8704	0.0957766			3115.58	49021.9	811799	782631	1.91598e+06	15.6364	65.9434	1.17991e+08	237273	7.32072e+08	3.94423e+07	211488	9.93599e+08	23829.8	21251.8	2.0338e+06	8.02919e+06
JN07A079	6118	K feldspar		16.25	0.0465833	15.464	0.0401834	37.9641	0.0868916			3216.52	49290.2	815618	786674	1.93109e+06	0.836819	5.52554	1.70232e+08	189832	8.64821e+08	4.76738e+07	132075	1.18287e+09	29644.7	34035.3	1.07779e+06	9.64546e+06
JN07A080	6118	K feldspar		16.2336	0.0317549	15.4988	0.0368133	38.0267	0.0884011			3676.76	43693	722239	698890	1.71451e+06	0.648128	9.21901	1.30493e+08	178053	7.98133e+08	4.35759e+07	117174	1.09832e+09	25753.5	29618.3	821957	8.7281e+06
JN07A081	6118	K feldspar		16.4503	0.0359409	15.5197	0.044576	40.594	0.367113			3622.72	94412.7	1.58139e+06	1.51217e+06	3.95459e+06	596.112	811.377	1.34607e+08	230697	9.2045e+08	5.0406e+07	224233	1.29915e+09	31416.9	33637	1.62202e+06	1.11511e+07
JN07A082	6118	K feldspar		16.1707	0.0374371	15.4195	0.0439526	37.7424	0.0882919			3685.26	44535.7	733244	708686	1.73427e+06	497.993	1177.28	1.36295e+08	417667	8.44625e+08	4.58616e+07	88838.5	1.15189e+09	42918.8	35222	3.38396e+06	8.81032e+06
JN07A083	6118	K feldspar		16.3099	0.0363269	15.4748	0.0342204	38.0151	0.0980483			3452.18	70150.8	1.16487e+06	1.12027e+06	2.75131e+06	3.19506	56.4218	1.15303e+08	436238	8.57823e+08	4.66126e+07	100335	1.22251e+09	28234.5	43272.2	3.23075e+06	1.11968e+07
JN07A084	6118	K feldspar		16.3576	0.0295389	15.5018	0.0304272	39.2877	0.460444			3145.34	83061.8	1.38322e+06	1.32873e+06	3.3665e+06	101.382	162.707	1.17309e+08	1.06327e+06	8.95395e+08	4.99026e+07	108307	1.31829e+09	27291.3	32528.7	7.80082e+06	1.20208e+07
Charcot	Chugunov Island	granodiorite
JN07A085	6119	K feldspar		16.0225	0.038162	15.374	0.0411021	37.2716	0.101296			3760.11	36717.8	598906	582517	1.41172e+06	311.257	416.423	1.91325e+08	1.09974e+06	7.20069e+08	3.55364e+07	8725.33	7.35905e+08	126130	124004	8.8186e+06	1.09859e+07
JN07A086	6119	K feldspar		15.9301	0.0300689	15.2449	0.035226	37.0439	0.0766599			3480.64	42104.3	682774	662354	1.60882e+06	3045.76	1203.22	1.5855e+08	800781	7.63154e+08	3.95584e+07	26352.4	9.18943e+08	78261.5	62173.7	8.0151e+06	1.36851e+07
JN07A087	6119	K feldspar		15.9697	0.0297377	15.3217	0.028575	37.3401	0.0870768			3264.69	63227.9	1.02783e+06	999649	2.43513e+06	1156.9	112.085	1.15491e+08	362805	8.82805e+08	4.86605e+07	12543	1.25628e+09	31217.5	34577.5	4.55943e+06	1.83931e+07
JN07A088	6119	K feldspar		16.0009	0.0472224	15.3586	0.0497307	37.2791	0.107048			3491.51	41501.4	675930	657717	1.59565e+06	659.453	360.424	1.81617e+08	794004	7.59773e+08	3.90117e+07	15397.4	8.56329e+08	88826.2	56111.5	6.26445e+06	1.24343e+07
JN07A089	6119	K feldspar		15.964	0.0592895	15.3029	0.0544815	37.3283	0.11413			3261.56	43828.3	712146	692067	1.68724e+06	1746.64	100.107	1.2514e+08	95245.8	6.82905e+08	3.65719e+07	8479.28	8.62467e+08	55145.5	49344.8	1.81136e+06	1.25026e+07
JN07A090	6119	K feldspar		16.01	0.0639676	15.2988	0.0517972	37.2345	0.12105			3275.02	40575.5	661165	640526	1.558e+06	1570.13	182.371	1.45395e+08	1.48431e+06	7.14978e+08	3.64648e+07	10566.9	8.34239e+08	79845.3	143675	1.24701e+07	1.19414e+07
JN07A091	6119	K feldspar		16.012	0.0310892	15.3401	0.0361376	37.3235	0.104218			3516.75	41203.2	671448	652182	1.58579e+06	1253.06	3184.39	1.57631e+08	25869.6	7.426e+08	3.78374e+07	51989.3	8.61932e+08	91030.7	61778.7	1.88654e+06	1.23943e+07
JN07A092	6119	K feldspar		16.0017	0.0312737	15.3196	0.0341533	37.3419	0.0732982			3271.84	53201.5	866375	840966	2.04846e+06	2327.52	1442.12	1.09528e+08	1.69836e+06	7.44679e+08	3.99769e+07	13651.8	1.01782e+09	37728.9	86545.3	1.9998e+07	1.47896e+07
JN07A093	6119	K feldspar		15.9463	0.0378067	15.3088	0.0468727	37.1572	0.103915			2971.21	44889.6	728453	709073	1.71977e+06	141.949	340.03	1.27725e+08	305265	7.32915e+08	3.8087e+07	15413.4	9.24232e+08	56799.4	49988.5	3.62869e+06	1.3243e+07
JN07A094	6119	K feldspar		16.0267	0.0262478	15.3389	0.0262777	37.3589	0.0709783			2770.17	54070	881816	855764	2.08261e+06	8481.26	9784.04	1.17942e+08	124209	7.819e+08	4.21243e+07	205760	1.05653e+09	43410.1	35533.5	1.9384e+06	1.6005e+07
Bunger	Mount Strathcona	felsic gneiss
MY24A082	6001	K feldspar		16.9673	0.0317979	15.7181	0.0228989	37.0263	0.0551631			3344.68	48255.7	810759	775325	1.81024e+06	101.18	15.9429	7.24424e+07	43806.1	5.31669e+08	2.81336e+07	160004	8.6905e+08	11884.8	32197.9	600746	1.03228e+07
MY24A083	6001	K feldspar		16.968	0.0381358	15.7203	0.0335444	37.11	0.0627987			3325.82	41043.8	689644	659541	1.54318e+06	9.00432	41.9631	6.97139e+07	79195.3	5.81253e+08	3.15973e+07	27887.4	1.00473e+09	13706.6	37802	1.13505e+06	9.06947e+06
MY24A084	6001	K feldspar		16.9613	0.0452599	15.6931	0.042309	37.0521	0.0947607			3724.94	33763.3	567109	541605	1.26747e+06	3.60374	3.32048	8.08562e+07	35254.1	4.90921e+08	2.4994e+07	124507	7.42131e+08	16950.9	33060	687171	7.47803e+06
MY24A085	6001	K feldspar		16.9611	0.0253037	15.6673	0.0234023	37.0083	0.0318362			3274.96	44887.2	753970	718864	1.68308e+06	12.8946	15.5861	8.3189e+07	41697.3	5.90241e+08	3.20239e+07	172143	9.95329e+08	19123.3	37166.1	881750	8.78476e+06
MY24A086	6001	K feldspar		16.9451	0.0314652	15.6707	0.0355452	36.93	0.0928627			3365.59	40068.7	672423	641832	1.49924e+06	7.79457	1.46694	7.90595e+07	19802.8	4.988e+08	2.58813e+07	64188	7.76496e+08	14131.9	25933.7	534093	8.54998e+06
MY24A087	6001	K feldspar		16.9825	0.0344247	15.7024	0.028023	37.0636	0.0604572			2948.2	53014.5	891666	850921	1.99082e+06	517.714	84.6022	8.46923e+07	65388.9	5.89134e+08	3.17552e+07	188244	9.86218e+08	18790.7	29963.7	928146	9.88945e+06
MY24A088	6001	K feldspar		17.0262	0.0447474	15.7783	0.0520989	37.3054	0.0986743			3183.65	32466.2	547484	523624	1.22715e+06	41.5851	44.6213	7.64034e+07	9136.62	4.9021e+08	2.51275e+07	133054	7.5628e+08	16078.2	29206.6	614741	9.15499e+06
MY24A089	6001	K feldspar		16.9731	0.0536854	15.7226	0.039952	37.0446	0.0905426			3401.32	33432.1	562036	537302	1.25484e+06	3.68162	2.34234	9.7786e+07	86732.6	5.15513e+08	2.65031e+07	149932	7.73316e+08	17467.3	33359.1	1.35545e+06	9.12908e+06
MY24A090	6001	K feldspar		17.0168	0.0337667	15.7346	0.0414133	37.1607	0.10124			3149.91	41111.2	692931	661225	1.54792e+06	11.1111	24.8677	7.44605e+07	21516.5	5.35805e+08	2.7608e+07	151560	8.39528e+08	8397.32	30790.8	1.13566e+06	1.49082e+07
MY24A091	6001	K feldspar		16.9598	0.0351939	15.7451	0.045944	37.1069	0.0799663			2828.47	39806.5	668717	640670	1.49664e+06	144.817	21.0101	5.64854e+07	33541.5	4.45285e+08	2.26271e+07	84930.3	7.03144e+08	10392.1	12092.3	605299	8.80418e+06
Bunger	Obruchev Hills C	orthogneiss
MY24A067	5801	K feldspar		15.4963	0.054403	15.2084	0.0632431	35.1408	0.131747			6385.42	18774.5	287934	291959	668490	19.9488	58.5401	8.90634e+07	114086	5.43875e+08	2.8377e+07	12667.2	8.3949e+08	29780.7	62827	3.13154e+06	1.48057e+07
MY24A068	5801	K feldspar		15.604	0.0374791	15.2317	0.0343198	35.4145	0.0800144			6311.71	19844	306463	309054	712065	17.7011	19.6216	1.0431e+08	287564	5.72757e+08	3.01094e+07	12540.4	8.76161e+08	44043.5	74740.3	2.34788e+06	1.43532e+07
MY24A069	5801	K feldspar		15.5919	0.0545451	15.2668	0.0417213	35.3429	0.124636			6094.01	17878.9	275910	279081	640245	6.86778	26.4049	1.00709e+08	320395	5.55532e+08	2.90907e+07	12232.6	8.42685e+08	43697.1	70923	3.23758e+06	1.41995e+07
MY24A070	5801	K feldspar		15.4917	0.0433497	15.1234	0.0353443	35.081	0.0843405			5997.6	18382.5	281870	284238	653394	52.9702	31.4031	1.24697e+08	1.63876e+06	5.63361e+08	2.9422e+07	14537.3	7.67464e+08	74970.2	66282.8	6.9554e+06	1.41396e+07
MY24A071	5801	K feldspar		15.4075	0.0531439	15.1114	0.0444061	35.0397	0.0863148			6899.9	15666.5	238926	242045	556195	6.039	15.9992	9.08323e+07	25755.5	5.03597e+08	2.54198e+07	15579.1	7.2647e+08	37124.2	64067.8	1.15104e+06	1.37971e+07
MY24A072	5801	K feldspar		15.6575	0.0931199	15.283	0.0601207	35.3921	0.124541			7212.11	15988.3	247801	249815	573323	2.7458	5.33562	8.35716e+07	29285	5.14573e+08	2.62167e+07	15702.1	7.74656e+08	30478.5	65800.7	1.15851e+06	1.33642e+07
MY24A078	5801	K feldspar		15.5501	0.0572489	15.1951	0.0587297	35.2902	0.118376			6335.21	16110.3	248031	250243	576016	18.0588	14.0195	9.40012e+07	823410	5.06053e+08	2.61022e+07	13266.6	7.47152e+08	35091	61911.3	3.80425e+06	1.25041e+07
MY24A079	5801	K feldspar		15.6724	0.0370496	15.3457	0.0328897	35.568	0.0672216			6295.77	14395.2	223378	225816	518746	2.36661	0.1	8.76747e+07	180346	4.79252e+08	2.41421e+07	14999.9	6.8768e+08	40795.4	62511.6	1.64371e+06	1.19477e+07
MY24A080	5801	K feldspar		15.5693	0.0478524	15.2601	0.0476331	35.3973	0.126727			5568.95	15732.1	242525	245407	564200	8.48214	10.7779	8.70961e+07	12531.4	4.92626e+08	2.49266e+07	13764.5	7.21267e+08	36956.1	64406.3	1.04786e+06	1.23152e+07
MY24A081	5801	K feldspar		15.5108	0.055208	15.1926	0.0519255	35.2566	0.126047			5138.18	14584.2	223992	226492	520952	0.1	7.29629	9.76062e+07	31232.4	5.04178e+08	2.51896e+07	10813.4	7.02504e+08	42044.4	61128.1	912233	1.35563e+07
Bunger	Obruchev Hills NE	orthogneiss
MY24A102	5807	plagioclase		14.8158	0.0661337	15.1553	0.0669717	36.6253	0.165715			3194.05	2205.14	32373.7	34167.9	81850.4	4.73171	1.39096	2.92715e+08	28958.7	4.66268e+08	1.73796e+07	7475.06	1.38814e+07	357169	37109	7.26928e+06	507775
MY24A099	5807	plagioclase		14.4978	0.135522	14.9306	0.118083	36.0588	0.298143			3161.75	2282.46	32786.3	34839	83403.8	0.1	14.6137	3.03821e+08	67284.6	4.8976e+08	1.8405e+07	6883.28	2.29754e+07	373577	40113.4	9.99437e+06	632206
MY24A096	5807	plagioclase		14.5952	0.121279	14.9961	0.138188	36.2389	0.332683			2592.68	2602.48	37630.5	39895.8	95566.9	2.72429	1.40652	2.914e+08	145008	4.88605e+08	1.84515e+07	7966.88	3.84856e+07	381855	39542.5	9.54651e+06	972181
MY24A095	5807	plagioclase		14.3421	0.0921881	14.8271	0.0967676	35.7343	0.226607			2593.75	2521.67	35828.5	38220.9	91308.5	0.967192	0.1	3.07426e+08	180063	4.93352e+08	1.8535e+07	8145.35	2.45217e+07	377278	41819.7	7.47935e+06	750442
MY24A094	5807	plagioclase		14.5117	0.130062	14.9789	0.129013	36.1222	0.332336			2468.41	2450.76	35231.6	37525.7	89702.3	0.1	2.00445	2.80112e+08	502292	4.77234e+08	1.80651e+07	7404.01	3.31202e+07	383463	39768	1.05241e+07	669794
Bunger	Grace Rocks	rapakivi granite (moraine)
JN07A041	6230	K feldspar		16.7574	0.0560837	15.6403	0.0495519	36.8296	0.103366			5288.61	35244.2	602601	570421	1.34416e+06	26.1762	180.047	2.17447e+08	9689.68	8.41904e+08	4.70181e+07	7176.05	1.0588e+09	22508.8	82668.3	3.23999e+06	7.21347e+06
JN07A042	6230	K feldspar		16.7415	0.0522567	15.5677	0.0334178	36.8455	0.106636			5047.15	68903.4	1.17691e+06	1.10989e+06	2.62872e+06	5540.28	1523.29	1.16725e+08	29517.1	9.97758e+08	5.64569e+07	7915	1.49619e+09	24367.8	134455	4.83912e+06	1.04331e+07
JN07A043	6230	K feldspar		16.8599	0.0378325	15.6	0.0408659	36.9119	0.114704			5463.91	49116.9	844834	792731	1.87702e+06	11108.5	4433.84	2.08781e+08	35395.7	9.95035e+08	5.63186e+07	8852.59	1.36232e+09	21610.1	125590	2.97956e+06	1.14866e+07
JN07A044	6230	K feldspar		16.6965	0.048766	15.5607	0.0816071	36.649	0.162214			5497.17	27860.1	474535	448474	1.05699e+06	30.8823	119.854	2.3342e+08	12213.9	9.6802e+08	5.57415e+07	4541.78	1.29058e+09	26287.8	94086.5	7.93249e+06	8.51378e+06
JN07A045	6230	K feldspar		16.7214	0.0357893	15.5825	0.0305058	36.6891	0.0900094			4782.47	41769.1	712466	673247	1.58625e+06	40.8268	82.4339	1.66493e+08	6516.71	9.28056e+08	5.26607e+07	6341.96	1.314e+09	18157.3	116189	3.98989e+06	8.43511e+06
JN07A046	6230	K feldspar		16.7829	0.0318787	15.6261	0.0401643	36.8492	0.105609			5234.24	45649.1	781469	737771	1.74098e+06	7736.5	883.116	1.30087e+08	17333.6	9.01182e+08	5.13451e+07	8202.87	1.32539e+09	19560.2	143056	4.63983e+06	9.0471e+06
JN07A047	6230	K feldspar		16.6862	0.0457715	15.5367	0.0410279	36.5712	0.0971829			4725.41	33507	570272	538382	1.26813e+06	2692.95	2218.22	1.85112e+08	44630	9.3685e+08	5.34416e+07	3729.41	1.31032e+09	15424.6	39904.2	6.68031e+06	8.434e+06
JN07A048	6230	K feldspar		16.68	0.067286	15.4843	0.0553544	36.606	0.116215			4912.78	35625.6	606070	570440	1.34945e+06	454.471	217.601	1.90299e+08	27330	9.15816e+08	5.18824e+07	4029.36	1.25587e+09	18740.3	55587.1	5.80024e+06	7.83676e+06
JN07A049	6230	K feldspar		16.7129	0.0432627	15.533	0.0435505	36.7228	0.0893009			4953.25	59558.5	1.01516e+06	956567	2.26296e+06	125.295	547.003	2.05742e+08	39763.3	1.00932e+09	5.87603e+07	5238.38	1.44738e+09	20123.2	68243.5	6.53943e+06	8.75563e+06
JN07A050	6230	K feldspar		16.7563	0.0317689	15.5607	0.0506763	36.8292	0.111161			4656.27	42955.2	734022	691068	1.63667e+06	2239.54	2441.57	1.99022e+08	82633.7	9.26714e+08	5.22306e+07	7563.32	1.25509e+09	19585.1	120453	5.5038e+06	9.20666e+06
Bunger	Long Lake	orthogneiss
MY24A016	5960	K feldspar		17.5658	0.0494499	15.7609	0.0469574	37.5725	0.0821639			3494.44	15160	263038	245287	578448	1.65722	28.0332	7.11553e+07	1.36152e+06	6.16374e+08	3.25126e+07	84068.8	9.86284e+08	42826.7	80131.2	6.36193e+06	1.94864e+07
MY24A017	5960	K feldspar		17.4575	0.0890669	15.6355	0.0677216	37.2454	0.162752			3397	15820.1	272813	253902	598339	1.40652	19.9333	5.54056e+07	341402	5.69635e+08	2.91304e+07	69566.5	8.89371e+08	34136.7	104603	1.92752e+06	1.87093e+07
MY24A019	5960	K feldspar		17.6443	0.0570079	15.8212	0.0461233	37.5476	0.103259			2342.77	17960.8	313066	291611	684714	3.80315	35.265	8.33315e+07	4.7153e+06	6.23117e+08	3.24628e+07	70429.5	9.14669e+08	94468.4	58819.4	2.34138e+07	2.00117e+07
MY24A020	5960	K feldspar		17.5705	0.0571928	15.7516	0.0717767	37.5134	0.175653			2368.8	15039.8	261065	243084	572797	0.569616	14.316	7.06324e+07	112393	5.56694e+08	2.87904e+07	71547.9	8.65584e+08	34821.5	73658.6	759364	1.85967e+07
MY24A021	5960	K feldspar		17.46	0.0358251	15.6419	0.0264509	37.2605	0.0953794			2765.6	13810	238219	221626	522376	1.74529	48.8372	1.14515e+08	607397	6.1968e+08	3.17063e+07	63057.2	8.44855e+08	109027	52992.6	5.16013e+06	1.82282e+07
MY24A022	5960	K feldspar		17.4826	0.0567822	15.6426	0.0475091	37.2935	0.0853046			3395.99	15809.3	273072	253696	598493	1.62973	43.5984	6.42594e+07	318683	6.07307e+08	3.21233e+07	77446.3	9.8792e+08	39641.7	85512.3	2.11056e+06	1.87446e+07
MY24A023	5960	K feldspar		17.4491	0.0500326	15.6287	0.0357755	37.2493	0.114318			3130.34	17852.5	307784	286197	674995	10.2719	21.0526	5.20564e+07	807745	6.08608e+08	3.19557e+07	77691.6	1.00715e+09	32867.1	81348.3	4.06671e+06	2.15829e+07
MY24A024	5960	K feldspar		17.5563	0.0575899	15.7458	0.0489471	37.3961	0.0936564			2644.29	19813.6	343706	319983	752048	1.93438	36.0114	4.83735e+07	3.43191e+06	6.04001e+08	3.24876e+07	75818.9	1.00537e+09	45617.1	62278.2	2.23487e+07	1.97927e+07
MY24A025	5960	K feldspar		17.5244	0.038793	15.7395	0.0582409	37.3979	0.124623			3431.83	18282.8	316587	295109	693931	1.25054	15.8482	5.4394e+07	437809	6.39946e+08	3.40607e+07	83586.5	1.08003e+09	39026.6	74530.6	2.1606e+06	1.90099e+07
MY24A026	5960	K feldspar		17.5882	0.0414104	15.7635	0.0393783	37.5815	0.0984552			3081.43	16639.7	289195	268968	634628	2.07616	12.2553	6.39143e+07	607586	5.82926e+08	3.10593e+07	71295.1	9.4102e+08	38316.1	63618.6	6.01706e+06	1.78078e+07
MY24A027	5960	K feldspar		17.4814	0.0549669	15.709	0.0627057	37.4225	0.127701			3419.74	16817.6	290525	270877	638660	32.5006	15.604	4.43074e+07	72946.8	5.93207e+08	3.10951e+07	72132.1	9.86185e+08	28332.4	56895	1.10904e+06	1.87414e+07
Bunger	Geografov Island/Currituck Island	orthogneiss
MY24A119	5623	plagioclase		17.1424	0.0452294	15.9567	0.0309154	49.8512	0.120275			3362.82	20036.9	340549	327113	1.01293e+06	12.8935	28.4347
MY24A120	5623	K feldspar		17.1387	0.0692351	15.9709	0.0539668	46.6389	0.201252			3208.82	17719.8	301112	289558	838103	4.73324	9.88865	1.18706e+08	31124.7	4.93964e+08	2.43495e+07	34952.4	6.39218e+08	80038.1	88873.4	2.73407e+06	7.21276e+06
MY24A121	5623	K feldspar		17.3605	0.0663661	16.181	0.0963126	47.2304	0.186318			2851.78	17544.6	302002	290484	840384	1.77489	6.30591	1.10056e+08	27630.2	4.66662e+08	2.31789e+07	32439.6	6.16747e+08	75747.5	83621.5	2.73686e+06	7.39862e+06
MY24A122	5623	K feldspar		17.0402	0.0596423	15.9007	0.0504932	47.1409	0.130674			2745.12	17691.5	298923	287860	845855	8.06682	12.2443	1.07697e+08	45401.2	5.04911e+08	2.52264e+07	31180.8	6.93651e+08	60284.3	86539.9	2.18464e+06	7.21366e+06
MY24A123	5623	K feldspar		17.1356	0.0489518	15.9437	0.0454867	47.1542	0.161664			3406.88	23301.3	395924	380184	1.11444e+06	67.4502	228.256	1.36799e+08	432937	5.871e+08	3.11825e+07	35348.3	8.57188e+08	79988.4	76894.5	5.66263e+06	8.3532e+06
MY24A124	5623	K feldspar		17.1172	0.0715487	15.9588	0.0712381	46.4711	0.178772			2887.6	17763	301507	290115	837291	11.1607	99.721	1.09868e+08	113146	4.89999e+08	2.43555e+07	32287.7	6.58106e+08	70809.8	77739.4	2.69499e+06	6.41494e+06
MY24A125	5623	K feldspar		17.1355	0.0309565	15.9865	0.0285933	46.9102	0.0676547			2723.45	20734.2	352327	339254	986631	3.14371	69.7774	1.09862e+08	157237	5.40742e+08	2.7886e+07	33390.4	7.98318e+08	60879.8	80574.9	2.7274e+06	8.1421e+06
MY24A126	5623	K feldspar		17.0968	0.0187429	15.9359	0.0278006	46.4356	0.0635891			2617.11	17220.5	291968	280888	811183	0.124182	133.149	8.42653e+07	38701.3	4.89655e+08	2.49623e+07	33272.3	7.3769e+08	31451.7	86934.3	2.34258e+06	7.46393e+06
MY24A127	5623	K feldspar		17.0736	0.0527382	15.9074	0.0458967	46.3858	0.116952			2680.85	22310.1	377761	363281	1.04986e+06	7.45164	120.844	1.29716e+08	229505	5.69785e+08	2.97396e+07	100289	8.33874e+08	76986.8	84347.7	3.81632e+06	8.15257e+06
MY24A128	5623	K feldspar		17.027	0.0235004	15.8634	0.0250948	46.3992	0.0573656			2194.5	22390	378090	363599	1.05399e+06	4.98751	40.6587	1.14053e+08	119019	5.4823e+08	2.85452e+07	33504.1	8.07471e+08	67088.7	91404.4	3.65548e+06	7.54321e+06
Bunger	Geografov Island/Currituck Island	metapelite
MY24A140	5606	K feldspar		16.8576	0.0938029	15.5028	0.0803114	38.248	0.208956			2980.19	23260.8	389034	369517	903306	17.8428	5.74679	1.67416e+08	75884.9	5.80319e+08	3.1839e+07	48958	8.63151e+08	16379.3	178994	1.0118e+06	8.9375e+06
MY24A141	5606	K feldspar		16.906	0.0515693	15.5195	0.0685868	37.5	0.129965			3030.18	18121.6	303960	288213	690016	4569.53	2473.67	1.58733e+08	1.43552e+06	5.49314e+08	2.90184e+07	47261.2	7.78487e+08	18655.7	150447	1.80835e+07	7.09704e+06
MY24A142	5606	K feldspar		16.9017	0.0934874	15.584	0.0750284	38.1428	0.181373			2995.63	20750.1	347974	331421	803708	1012.27	25.7518	1.3613e+08	86544.6	4.83616e+08	2.49939e+07	45107.8	6.64742e+08	12798.2	136293	1.09912e+06	7.67907e+06
MY24A143	5606	K feldspar		16.8881	0.0266907	15.6133	0.027753	37.2638	0.0633221			3180.06	21238.9	355894	339900	803740	6637.79	346.211	1.41553e+08	154905	5.37356e+08	2.85784e+07	50141.9	7.90849e+08	16126.6	147248	1.64223e+06	7.94824e+06
MY24A144	5606	K feldspar		16.9224	0.0329634	15.6272	0.044913	37.2488	0.0887658			2955.53	19357.8	325042	310103	732314	6.24999	13.3041	1.51991e+08	77191.6	5.43188e+08	2.89112e+07	36524.5	7.83947e+08	17449	178776	1.25129e+06	7.54211e+06
MY24A145	5606	K feldspar		16.8904	0.0453953	15.5905	0.0319433	37.2774	0.0702262			2782.63	22577.5	378399	360866	854835	33.042	25.9325	1.50052e+08	220176	5.54854e+08	2.99989e+07	52973	8.31792e+08	14328.5	148879	3.48352e+06	1.03801e+07
MY24A146	5606	K feldspar		16.8536	0.0433421	15.5781	0.0498959	37.2443	0.103329			2931.06	16952.6	283515	270773	641344	24098.1	1256.18	1.97751e+08	797245	6.00637e+08	3.2313e+07	52184.5	8.04843e+08	35976.8	137624	1.15155e+07	8.91259e+06
MY24A147	5606	K feldspar		16.8665	0.0746127	15.6384	0.0524455	37.3254	0.123352			3042.24	26648.7	446028	427334	1.01043e+06	11494.9	279.106	1.95582e+08	645318	6.25562e+08	3.52009e+07	57803.1	9.66177e+08	17624.7	206606	7.42158e+06	9.86676e+06
MY24A148	5606	K feldspar		16.8552	0.0441326	15.549	0.0502492	37.2153	0.105783			2701.7	17483.6	292442	278791	661023	9342.81	939.316	1.54002e+08	648284	5.4412e+08	2.87854e+07	39479.2	7.64954e+08	19220.5	152667	1.61783e+07	7.65525e+06
MY24A149	5606	K feldspar		16.8435	0.0822753	15.567	0.0820995	37.1623	0.18241			2526.98	22607.2	377891	360948	853586	1061.55	25.5233	1.45807e+08	66873	5.5885e+08	2.97814e+07	47926.7	8.2625e+08	14780.1	144461	1.06026e+06	8.85614e+06
MY24A150	5606	K feldspar		16.8743	0.0571735	15.6118	0.0549701	37.4018	0.123809			2269.79	22394.7	375036	358623	851081	14.3919	4.44171	1.51225e+08	53141.4	4.9828e+08	2.6189e+07	51753.1	6.83565e+08	11491.9	145019	682048	8.68185e+06
MY24A151	5606	K feldspar		16.9318	0.0478012	15.6151	0.04979	37.2587	0.1042			2287.35	31144	523351	498892	1.17916e+06	6.79108	76.5464	1.97036e+08	113510	6.66084e+08	3.76652e+07	62553.9	1.03842e+09	15479.2	223335	1.47478e+06	1.13464e+07
Bunger	Bunger Hills	rapakivi granite (moraine)
JN07A027	5878	K feldspar		17.1065	0.109818	15.5265	0.070416	36.7577	0.163751			5796.9	13282.6	232026	213775	506423	3288.13	2868.03	1.42331e+08	71887.6	1.00904e+09	5.83082e+07	3887.75	1.50255e+09	14645.4	23109.7	2.88517e+06	5.509e+06
JN07A028	5878	K feldspar		16.8891	0.0736491	15.5938	0.0550906	36.8952	0.135129			5677.71	28685	494685	463608	1.09762e+06	62.4023	200.461	1.40539e+08	14691.7	9.51777e+08	5.43026e+07	346.037	1.37094e+09	5283.54	18633.7	3.69616e+06	4.40024e+06
JN07A029	5878	K feldspar		16.7821	0.0640097	15.6254	0.0666393	37.0026	0.123733			5271.68	52897.4	906406	856546	2.02975e+06	248.88	199.319	1.20252e+08	3564.93	8.48788e+08	4.80859e+07	784.308	1.24832e+09	9662.35	34150.6	1.90603e+06	4.66084e+06
JN07A030	5878	K feldspar		16.7074	0.0481894	15.5457	0.0519045	36.588	0.135395			5223.51	48286.8	823667	777802	1.83185e+06	93.7485	114.059	1.30099e+08	5286.22	9.49803e+08	5.37776e+07	832.443	1.39119e+09	7063.07	27010.2	2.91894e+06	4.52378e+06
JN07A031	5878	K feldspar		17.1767	0.0707773	15.5723	0.0518215	37.152	0.118928			5822.84	34790.2	610077	561283	1.34001e+06	5486.34	5900.26	9.90529e+07	81590.2	1.06365e+09	6.24623e+07	3143.62	1.69744e+09	9343.54	60795.3	2.93309e+06	6.53391e+06
JN07A032	5878	K feldspar		16.9222	0.0575142	15.7552	0.0636533	39.2487	0.483889			5878.5	92221.2	1.59313e+06	1.50512e+06	3.75208e+06	2683.75	695.585	1.28957e+08	25221.7	9.50094e+08	5.39679e+07	5156.04	1.40329e+09	16722.7	92055.2	3.99146e+06	6.18146e+06
JN07A033	5878	K feldspar		16.8664	0.0667717	15.5517	0.0558011	36.8749	0.138047			5280.62	46074	793258	742161	1.76097e+06	6103.28	6018.8	2.86403e+08	22282.7	1.03777e+09	5.92958e+07	6676.45	1.3315e+09	31959.8	123407	7.11472e+06	5.47265e+06
JN07A034	5878	K feldspar		16.7447	0.0621976	15.5043	0.0528369	36.6399	0.121165			5284.26	51838.7	886020	832371	1.96844e+06	1416.62	3704.63	1.6254e+08	23741.8	1.00416e+09	5.77118e+07	3807.27	1.4646e+09	14784.6	49571	2.12017e+06	4.73633e+06
JN07A035	5878	K feldspar		16.7654	0.0412887	15.5437	0.0420746	36.7883	0.0984775			4695.49	57202.6	978851	920723	2.18066e+06	106.186	260.986	9.3065e+07	11665.7	9.23787e+08	5.18693e+07	2018.12	1.38677e+09	8885.72	36209.5	4.44085e+06	4.9114e+06
JN07A036	5878	K feldspar		16.8988	0.059333	15.5895	0.064017	36.8408	0.137548			4147.5	18741.2	323230	302507	715382	1262.63	1637.61	1.40098e+08	30707.9	9.13752e+08	5.25181e+07	609.898	1.34308e+09	10237.7	14512.2	3.28937e+06	3.51205e+06
Bunger	Thomas Island SW	metapelite
MY24A129	5638	plagioclase		16.9031	0.072988	15.6804	0.0870971	37.0519	0.163377			3518.18	5633.1	94434.2	90429	211764	18.594	7.50053	1.70146e+08	123286	4.72586e+08	1.34383e+07	56116.9	5.92774e+06	558963	34758.9	630589	102788
MY24A130	5638	K feldspar		16.9054	0.0442565	15.5866	0.0506746	36.9214	0.103498			2432.92	36150.1	606128	576896	1.35428e+06	3.19223	6.91964	8.1495e+07	54455.5	5.13477e+08	2.61202e+07	171833	7.74888e+08	32218.7	101984	189909	1.45605e+07
MY24A131	5638	K feldspar		16.9065	0.0244331	15.5907	0.0244729	37.0401	0.0543962			1993.42	35258.7	591241	562861	1.32521e+06	43.5444	50.0829	9.19084e+07	66123.2	5.68299e+08	3.02863e+07	198941	9.04064e+08	29132.3	96914.5	247502	1.47143e+07
MY24A133	5638	K feldspar		16.8915	0.031606	15.6148	0.0301666	37.2299	0.0850373			1633.93	45441.6	761365	726656	1.7169e+06	31.0986	96.9916	7.30298e+07	76417.7	5.41347e+08	2.79459e+07	226171	8.66451e+08	31715.6	142510	421697	1.79903e+07
MY24A134	5638	K feldspar		16.9299	0.037104	15.6706	0.0446802	36.9792	0.0812257			2071.16	41564.5	698009	667082	1.55994e+06	1.81683	14.5725	5.61883e+07	164984	4.98824e+08	2.52371e+07	176196	7.88688e+08	22026.9	106143	440853	1.71687e+07
MY24A135	5638	K feldspar		16.9218	0.0346547	15.6563	0.0418587	37.0229	0.0823732			2054.19	33205.8	557390	532492	1.24778e+06	4.13112	29.0853	8.18317e+07	41251.2	4.89862e+08	2.52471e+07	151509	7.36774e+08	27930.3	94579.7	286648	1.41887e+07
MY24A137	5638	K feldspar		16.7987	0.0295348	15.5455	0.0254069	36.7089	0.048725			2283.09	37097.6	618227	590791	1.38238e+06	4.98243	3.06064	7.34339e+07	73942	5.20628e+08	2.66997e+07	159609	8.22494e+08	25426.9	120071	219734	1.42462e+07
MY24A138	5638	K feldspar		16.9287	0.0285871	15.6369	0.0216369	37.0073	0.045152			2386.98	42050.3	706208	673658	1.57978e+06	3.67566	28.742	1.03984e+08	96089.7	6.01898e+08	3.2082e+07	194028	9.72137e+08	54046.6	125425	345647	1.51666e+07
MY24A139	5638	K feldspar		16.8647	0.0313149	15.6181	0.0281209	36.8657	0.0588953			2316.93	37289.6	623907	596726	1.39567e+06	7.34966	25.2291	6.17548e+07	107473	5.29329e+08	2.69983e+07	141775	8.51122e+08	32413	123351	384459	1.63158e+07
Bunger	Thomas Island N	orthogneiss
MY24A103	5628	K feldspar		17.001	0.0486408	15.6149	0.065778	37.6019	0.126926			3775.98	15878.7	267507	253503	605118	2.72429	26.9875	3.74061e+07	2.08021e+06	5.31685e+08	2.80456e+07	13169.7	9.20241e+08	31464.5	75540.1	1.42019e+07	6.23919e+06
MY24A104	5628	K feldspar		16.9346	0.0413117	15.5441	0.0272203	37.5692	0.0740361			3475.74	18449.8	309618	293223	702507	4.39523	33.7808	4.62151e+07	3.51921e+06	5.99323e+08	3.22746e+07	13180.1	1.04799e+09	37452.9	69969.8	2.24337e+07	7.62044e+06
MY24A105	5628	K feldspar		17.0277	0.0598729	15.6557	0.0548995	37.7802	0.146575			3504.26	13533.2	228366	216636	518209	6.68151	16.9886	5.31086e+07	484767	5.51986e+08	2.94595e+07	15424.2	9.49167e+08	30990.7	71556.6	4.14699e+06	6.12045e+06
MY24A106	5628	K feldspar		16.9924	0.0537952	15.591	0.0571461	37.5796	0.131771			3389.98	11990.9	201927	191159	456727	10.7143	91.812	4.20215e+07	2.2204e+06	4.8653e+08	2.49888e+07	11392.8	7.97049e+08	24143.4	61986.4	1.39206e+07	5.59518e+06
MY24A107	5628	K feldspar		16.9633	0.0809664	15.5498	0.0766571	37.5937	0.18722			3065.93	14833	249369	235852	565212	13.4915	25.7783	4.36742e+07	929423	5.68509e+08	3.07111e+07	13789.9	1.01138e+09	25534.3	66177	6.95877e+06	6.88551e+06
MY24A108	5628	K feldspar		17.0318	0.041129	15.6484	0.0484234	37.778	0.103202			2999.01	18055.2	304776	288916	691389	14.1452	63.8274	5.12346e+07	906419	5.54979e+08	2.95112e+07	14082.6	9.5413e+08	28802	72957.8	7.86155e+06	6.98433e+06
MY24A114	5628	K feldspar		17.0291	0.0665906	15.6584	0.0495695	37.6844	0.102079			2797.54	21352.7	360454	341987	815812	172.559	57.5988	3.62565e+07	544476	5.28032e+08	2.8039e+07	15906.3	8.87873e+08	58446.2	67497.5	5.32564e+06	8.39416e+06
MY24A115	5628	K feldspar		17.1028	0.065161	15.6521	0.0622645	37.8655	0.149379			2278.55	12600	213628	201732	483736	3.17666	20.8882	4.56728e+07	2.60896e+06	4.95093e+08	2.54668e+07	13035.8	8.10105e+08	22665	65105.2	1.54854e+07	5.90182e+06
MY24A116	5628	K feldspar		16.9357	0.0554552	15.451	0.0450438	37.4522	0.144312			2245.28	14302.8	240137	226063	543138	7.25671	33.8217	5.16106e+07	2.07632e+06	5.92078e+08	3.22289e+07	16446.2	1.05337e+09	33863.2	83506.9	1.38591e+07	6.87527e+06
MY24A117	5628	K feldspar		16.9218	0.0540483	15.5867	0.0477284	37.5042	0.116045			2137.47	9982.85	167475	159178	379635	8.48227	14.7994	6.98705e+07	19754	5.23576e+08	2.74363e+07	15814.9	8.47121e+08	36553.7	75436.5	1.48579e+06	5.32843e+06
MY24A118	5628	K feldspar		16.9228	0.0267053	15.5225	0.0292995	37.617	0.0754863			2489.03	19100	320455	303316	728564	42.5453	326.413	4.76492e+07	6.35212e+06	5.5093e+08	2.90536e+07	12159.2	8.94176e+08	52434.5	66312.9	3.90811e+07	7.13529e+06
Bunger	Thomas Island N	metapelite
MY24A028	5631	K feldspar		16.9293	0.0594808	15.6717	0.0468987	37.545	0.116241			3824.54	17237.1	288379	276946	656695	77.0762	22.1654	1.2197e+08	30500.7	5.58154e+08	2.88825e+07	110903	7.92605e+08	42300.5	108925	561591	7.50262e+06
MY24A029	5631	K feldspar		16.8018	0.0494913	15.5589	0.0370683	37.2096	0.105325			3775.93	20671.9	343252	329710	780471	17.8356	13.4601	1.05766e+08	55618.4	5.63772e+08	2.91008e+07	117682	8.27236e+08	38442.5	120300	692477	8.11312e+06
MY24A030	5631	K feldspar		16.8389	0.0648618	15.6225	0.0665388	37.2835	0.134064			3771.02	15953.2	265494	255462	603476	39.8933	30.3465	1.00834e+08	27438	5.32155e+08	2.72976e+07	109097	7.66492e+08	42531	109823	470424	6.75366e+06
MY24A031	5631	K feldspar		16.9254	0.0453007	15.641	0.0394624	37.3878	0.0915747			3959.87	18414	308033	295186	698471	25.6699	72.456	1.10031e+08	874778	5.54128e+08	2.86764e+07	90952	8.01884e+08	41448.9	101970	2.87621e+06	7.47691e+06
MY24A032	5631	K feldspar		16.8136	0.0528588	15.6189	0.048946	37.3203	0.112295			3824.93	24105.5	400593	385844	912658	6.93514	73.0894	1.11864e+08	181806	5.78665e+08	3.0555e+07	94233	8.71743e+08	36943.4	97454.6	1.16768e+06	9.46328e+06
MY24A033	5631	K feldspar		16.9295	0.0552306	15.6769	0.0448622	37.4143	0.11242			3631.16	23567.8	394373	378602	894498	27.5827	61.1637	1.25415e+08	47938.6	6.4506e+08	3.45385e+07	106136	9.91152e+08	52307	122757	554349	8.83794e+06
MY24A034	5631	K feldspar		16.9005	0.0546819	15.6947	0.0413354	37.4446	0.108474			3058.49	22080.7	368869	355083	838691	25.6125	26.5043	9.62232e+07	42082.3	5.66578e+08	2.93653e+07	108569	8.46421e+08	40335	102327	515751	8.40906e+06
MY24A035	5631	K feldspar		16.8916	0.0327123	15.643	0.0416954	37.3347	0.071484			3026.14	21724.2	362736	348168	822683	11.6745	33.2379	1.14254e+08	86956.9	5.99378e+08	3.18397e+07	106871	9.11952e+08	47220.4	109621	927346	8.04675e+06
MY24A036	5631	K feldspar		16.8916	0.0212627	15.6688	0.0328529	37.4215	0.053685			2810.4	25398.1	424098	407684	964001	225.328	27.0089	1.29894e+08	143056	6.62901e+08	3.56737e+07	234157	1.0142e+09	52427.6	112356	978903	1.00337e+07
MY24A042	5631	K feldspar		16.8307	0.0702106	15.6153	0.0647841	37.3823	0.162149			1296.66	20843	346863	333259	790056	38.727	82.0718	1.61956e+08	484073	6.76999e+08	3.66097e+07	106087	1.01078e+09	67903.1	142586	2.45032e+06	9.51993e+06
Bunger	Thomas Island N	metapelite
MY24A006	5634	K feldspar		17.0085	0.0312417	15.7036	0.0345924	37.0247	0.0761128			4941.24	25488.1	428036	411436	959118	1.33928	7.58937	6.53928e+07	14957.8	5.08762e+08	2.62416e+07	164482	7.93935e+08	15516.7	92699.5	381352	1.00281e+07
MY24A007	5634	K feldspar		17.0985	0.027365	15.7148	0.0233435	37.1178	0.0650003			4729.73	30746.9	519105	496608	1.15982e+06	3.99634	8.01422	6.40814e+07	25867.4	5.59507e+08	2.91901e+07	167466	8.97938e+08	17806.3	98054.1	1.04876e+06	1.13615e+07
MY24A008	5634	K feldspar		16.9832	0.0231894	15.6712	0.0284357	36.8552	0.0626184			4643.56	35319.5	592307	568802	1.32276e+06	6.5196	9.82144	9.77046e+07	135311	6.54704e+08	3.60295e+07	199103	1.09706e+09	21871.2	114739	2.98079e+06	1.28069e+07
MY24A009	5634	K feldspar		16.9546	0.0396946	15.6238	0.0352726	36.8773	0.0828327			4390.47	32788.5	548958	526374	1.22861e+06	2.14339	12.4116	6.72329e+07	18225.3	5.36717e+08	2.77796e+07	231864	8.41959e+08	14230.2	90449	289898	1.189e+07
MY24A010	5634	K feldspar		16.9794	0.0322381	15.6333	0.0290662	36.8613	0.0737298			4552.72	33815.2	566998	543116	1.26643e+06	4.6875	13.3042	7.94193e+07	260984	5.88047e+08	3.11383e+07	301451	9.49835e+08	21137.9	99615.5	1.08061e+06	1.1848e+07
MY24A011	5634	K feldspar		16.9777	0.0339101	15.6713	0.0383918	36.9625	0.096373			4368.15	41762	700206	672294	1.56822e+06	0.664442	10.3635	7.06765e+07	31099.5	6.26499e+08	3.37594e+07	374844	1.05732e+09	17008.7	130371	709023	1.32121e+07
MY24A012	5634	K feldspar		16.9614	0.0409484	15.6347	0.0354196	36.8664	0.0785599			4711.17	32635.4	546682	524075	1.22222e+06	0.967192	11.9301	7.82826e+07	32517.3	6.1894e+08	3.312e+07	253311	1.00976e+09	16680.8	103376	392867	1.25967e+07
MY24A013	5634	K feldspar		16.9814	0.0258176	15.6943	0.0300548	36.9372	0.034203			4234.86	36933.2	619429	595276	1.38572e+06	15.6252	162.657	8.24415e+07	149396	5.79447e+08	3.07566e+07	224753	9.30919e+08	15651.1	110328	979459	1.1821e+07
MY24A014	5634	K feldspar		17.0297	0.0267681	15.7135	0.0240004	37.1041	0.0476755			3812.71	32981.4	554747	532165	1.24295e+06	0.648128	4.46428	5.89244e+07	19208.6	5.66788e+08	2.93177e+07	251070	9.11956e+08	16391.3	108988	360289	1.14884e+07
MY24A015	5634	K feldspar		16.9867	0.0306205	15.6592	0.0324045	36.9883	0.0493073			4665.26	31762.1	532911	510657	1.19317e+06	5.93073	20.9821	6.96551e+07	121108	5.93869e+08	3.31229e+07	267432	9.87771e+08	16614.2	103838	601008	1.22322e+07
Bunger	Booth Peninsula	quartz monzonite
JN07A005	5815	K feldspar		16.3696	0.0683659	15.3656	0.063223	36.2034	0.131932			9303.87	12492.7	209120	199674	470536	242.563	37.8536	1.46315e+08	71729.8	8.98087e+08	4.75495e+07	15453.6	1.14311e+09	111082	49028.7	2.26778e+06	1.49854e+07
JN07A006	5815	K feldspar		16.5061	0.0388627	15.4822	0.0387378	36.5298	0.0830744			7856.95	21637.6	365194	348398	822200	18.9055	36.8644	1.1522e+08	3.47165e+06	9.99514e+08	5.62803e+07	12533.6	1.46006e+09	56245.3	71383.7	2.62039e+07	2.21771e+07
JN07A007	5815	K feldspar		16.5999	0.0427485	15.5922	0.0417509	36.9564	0.230279			8090.67	14901.2	252912	241593	572753	43.3318	254.187	2.69106e+08	1.74604e+06	9.68916e+08	5.48603e+07	14435.3	1.11083e+09	112642	80634.6	1.33677e+07	2.55819e+07
JN07A008	5815	K feldspar		16.4766	0.050217	15.4543	0.0463294	36.4972	0.127955			6889.12	18745.2	315771	301175	711449	2.07251	28.6986	1.04568e+08	28683.2	8.36362e+08	4.58915e+07	12590.3	1.18079e+09	40687.4	91320	2.43301e+06	2.09826e+07
JN07A009	5815	K feldspar		16.4862	0.0676748	15.4452	0.0525358	36.4399	0.108694			6885.12	13854.7	233509	222431	524935	78.5518	442.766	1.31188e+08	2.5743e+06	9.28008e+08	4.99935e+07	13885.5	1.24765e+09	116323	45739.9	2.9004e+07	1.56836e+07
JN07A010	5815	K feldspar		16.5063	0.0579541	15.4862	0.0705656	36.5685	0.107303			6951.72	19873.3	335334	319851	755524	25.8936	52.161	1.51136e+08	2.77595e+06	1.06217e+09	6.11216e+07	15961.8	1.53229e+09	86950.3	69085.3	2.63754e+07	2.16436e+07
JN07A011	5815	K feldspar		16.4788	0.0400595	15.4667	0.0512814	36.4821	0.0899131			7505.49	17762.2	299193	285464	673574	81.9199	202.703	1.36998e+08	2.07773e+06	9.40173e+08	5.25627e+07	12007.6	1.29722e+09	80868.9	60030.1	2.1412e+07	1.91375e+07
JN07A012	5815	K feldspar		16.5426	0.0752485	15.5307	0.0728483	36.6772	0.136809			6699.39	10957.5	185276	176803	417692	131.667	24.9201	1.82478e+08	123854	8.71153e+08	4.6017e+07	15221.5	1.04824e+09	123262	49886	2.48032e+06	1.3961e+07
JN07A013	5815	K feldspar		16.5655	0.0466927	15.6035	0.0376033	36.6636	0.108736			6503.21	17353.3	293807	281268	661157	11.1607	23.4162	9.94055e+07	2.47624e+06	8.19585e+08	4.41908e+07	10474.7	1.12745e+09	54764.9	79682.9	1.74598e+07	1.85934e+07
JN07A014	5815	K feldspar		16.5315	0.0803708	15.5545	0.0661998	36.6004	0.15094			5159.37	17207.4	290720	277981	654376	10.6195	39.2169	1.66621e+08	8586.51	8.15074e+08	4.38244e+07	8758.63	1.02788e+09	46530.5	60491.5	475625	1.84224e+07
Wilkes	Mitchell Peninsula	granite
AU22A124	WI17	K feldspar		16.8112	0.0349242	15.6082	0.0353268	37.1117	0.0804526			1345.91	50362.3	860565	799855	1.92445e+06	397.807	35.2778	1.4984e+08	47314.8	7.57752e+08	4.13928e+07	35776.4	1.10075e+09	70593.8	31742.4	842884	7.4128e+06
AU22A125	WI17	K feldspar		16.8635	0.0354211	15.7088	0.0324934	38.9141	0.0873141			1683.27	102789	1.76186e+06	1.6431e+06	4.11878e+06	9110.89	428.095	1.09349e+08	164568	8.94361e+08	4.82039e+07	130362	1.40191e+09	49230	89152.1	1.95908e+06	1.10253e+07
AU22A126	WI17	K feldspar		16.7161	0.0445801	15.5884	0.0462676	36.9844	0.102116			1553.22	49946.8	848619	792317	1.90225e+06	26.8512	32.5915	1.28044e+08	76073.1	7.46124e+08	3.90512e+07	16488.2	1.05509e+09	11242.1	25813.4	1.66152e+06	6.72767e+06
AU22A127	WI17	K feldspar		16.8128	0.0285092	15.6555	0.0419115	37.1644	0.0953796			1574.08	51541	880765	821165	1.97265e+06	84.2672	32.1017	1.12274e+08	64533.2	7.09502e+08	3.64974e+07	22144.8	1.00166e+09	14700	39019.3	1.42948e+06	6.85422e+06
AU22A128	WI17	K feldspar		16.7838	0.0317027	15.614	0.0375244	37.1817	0.102625			1748.99	73444	1.25288e+06	1.16708e+06	2.81244e+06	1272.22	92.6713	1.21133e+08	104506	8.08587e+08	4.31036e+07	33769.3	1.20553e+09	21984.4	54315.6	1.27638e+06	8.04231e+06
AU22A129	WI17	K feldspar		16.8109	0.0276766	15.6331	0.0340157	37.2148	0.0786296			1775.28	79711	1.36197e+06	1.26828e+06	3.05537e+06	1152.83	119.347	1.30088e+08	74037.3	8.40782e+08	4.53953e+07	92613	1.2892e+09	17982.8	71072.4	2.20544e+06	8.51958e+06
AU22A130	WI17	K feldspar		16.8943	0.0288832	15.631	0.0290252	37.521	0.120056			1654.29	74167.2	1.27353e+06	1.17997e+06	2.86647e+06	2317.9	437.472	1.92565e+08	223061	7.96491e+08	4.23544e+07	22016	1.08832e+09	34388.6	53005.6	1.08613e+06	8.7676e+06
AU22A131	WI17	K feldspar		16.811	0.0296732	15.6159	0.0399668	38.3949	0.238415			1380.97	95775.7	1.63644e+06	1.52236e+06	3.78809e+06	205.557	137.679	6.46456e+07	223180	8.28387e+08	4.53914e+07	91973.3	1.3747e+09	18939.4	47280.1	1.46591e+06	7.876e+06
AU22A132	WI17	K feldspar		16.7465	0.0259488	15.6088	0.0345948	37.0812	0.077843			1584.48	48836.5	831221	775950	1.86562e+06	7198.6	361.219	1.94723e+08	154404	7.9728e+08	4.18428e+07	36543.4	1.06529e+09	45938.9	98928.9	4.52991e+06	6.56986e+06
AU22A133	WI17	K feldspar		16.7857	0.0355586	15.6068	0.044198	37.183	0.10308			1378.2	86113	1.46911e+06	1.36813e+06	3.29892e+06	165.567	21.8169	8.1341e+07	84584.6	7.9418e+08	4.20271e+07	143799	1.2327e+09	24424.7	72614.6	1.1381e+06	8.69602e+06
Wilkes	Bailey Peninsula	orthogneiss
AU22A019	WI42	K feldspar		16.6262	0.0382973	15.5808	0.0475847	36.6666	0.112625			3456	37108.9	629553	591256	1.40899e+06	8.24372	113.62	1.90562e+08	54450.8	7.4228e+08	3.88601e+07	96581.2	8.97661e+08	31037.9	37837.4	1.14196e+06	7.16698e+06
AU22A020	WI42	K feldspar		16.6473	0.0349537	15.5617	0.038217	36.7395	0.105745			3114.36	41818.8	710312	665394	1.59071e+06	5.97602	181.267	2.02828e+08	67163	8.10005e+08	4.3682e+07	56123.8	1.05039e+09	36058.7	30795.2	817450	9.46157e+06
AU22A021	WI42	K feldspar		16.5876	0.0414841	15.5267	0.0493522	36.6473	0.112066			3258.79	45578.1	771344	723480	1.72908e+06	1.13513	7.12018	2.11186e+08	60738.9	7.99904e+08	4.28443e+07	102956	1.01646e+09	26958.9	34809.5	1.32965e+06	9.12555e+06
AU22A022	WI42	K feldspar		16.6472	0.0389869	15.5741	0.0387651	36.7698	0.0918862			3176.52	44097.1	748912	702018	1.67821e+06	6.69745	71.1034	2.37335e+08	56305.9	7.28814e+08	3.86076e+07	57419.6	8.37465e+08	33345.9	25679.2	1.18593e+06	7.74344e+06
AU22A023	WI42	K feldspar		16.6295	0.0372777	15.5926	0.0476272	36.6952	0.102576			2982.27	39967.4	678014	636948	1.51771e+06	7.57179	4.17754	2.48273e+08	60647.9	7.57761e+08	4.03047e+07	29175.2	8.78923e+08	22059.7	13932	1.7169e+06	6.9611e+06
AU22A024	WI42	K feldspar		16.6119	0.0289927	15.5558	0.0308392	36.6782	0.0945686			3046.07	42233.5	715654	671385	1.60277e+06	1.61663	68.8225	1.13123e+08	68023.1	6.96779e+08	3.59209e+07	76097.9	9.23689e+08	26931.1	38382.5	846654	8.24602e+06
AU22A025	WI42	K feldspar		16.5991	0.0309103	15.553	0.0328051	36.6484	0.0903461			2946.7	52010.9	880604	826566	1.97191e+06	0.376114	32.3328	1.08927e+08	66891.6	7.42572e+08	3.90686e+07	57945	1.03071e+09	20452.3	32362.2	1.01738e+06	8.88653e+06
AU22A026	WI42	K feldspar		16.6011	0.0417164	15.5408	0.0488845	36.7205	0.115691			2626.02	56905.1	963525	903523	2.16138e+06	10.3704	54.0743	1.75408e+08	39159.3	8.04751e+08	4.41291e+07	87997.8	1.11802e+09	29321.5	39878.3	381884	9.11972e+06
AU22A027	WI42	K feldspar		16.6393	0.0395884	15.5709	0.0424084	36.8083	0.0975638			2478.51	55578.8	943178	884061	2.11573e+06	1.55146	138.941	2.04378e+08	122276	8.07886e+08	4.33062e+07	98923.7	1.03499e+09	24003.2	36313.3	2.04573e+06	9.45602e+06
AU22A028	WI42	K feldspar		16.64	0.036421	15.6	0.037367	36.7388	0.0955479			2578.68	39720.6	674051	632919	1.50898e+06	3.43561	89.6075	2.06763e+08	64200.8	7.18156e+08	3.76598e+07	32768.2	8.60086e+08	20410.2	18017.9	1.2973e+06	7.76848e+06
Wilkes	Fold Island	Ford Granite fine-grained
AU22A114	WI73	K feldspar		16.881	0.0389808	15.6385	0.0518308	37.0481	0.123257			1523.83	35985.7	617539	572448	1.37207e+06	842.981	239.032	2.03639e+08	43065	7.84806e+08	4.08951e+07	36292	1.00785e+09	45629.6	88185	2.99012e+06	5.35415e+06
AU22A115	WI73	K feldspar		16.7757	0.0451718	15.5977	0.0451884	36.8929	0.116134			1610.99	33683	574411	534434	1.27894e+06	38.6022	141.783	2.00888e+08	195139	7.7407e+08	4.01994e+07	54653.7	9.84549e+08	60713.1	133303	3.35994e+06	4.68627e+06
AU22A116	WI73	K feldspar		16.8117	0.0649204	15.6216	0.0556596	36.9935	0.14276			1885.91	26366.3	450593	418993	1.00389e+06	77.1796	57.5092	2.08548e+08	18720.3	6.98872e+08	3.51287e+07	27188.3	8.0334e+08	45888.6	73009.7	2.74865e+06	4.21434e+06
AU22A117	WI73	K feldspar		16.8487	0.0511619	15.6273	0.0354847	36.9849	0.106953			1783.4	24879.5	426115	395523	947105	151.033	63.5146	1.99907e+08	36151.8	6.5555e+08	3.29676e+07	23319.8	7.42666e+08	43955.6	77347.3	2.90371e+06	3.90989e+06
AU22A118	WI73	K feldspar		16.7866	0.032558	15.5567	0.0408928	36.8601	0.111139			1672.29	34094.2	581774	539582	1.29356e+06	2343.17	190.457	1.77092e+08	62779.5	6.59416e+08	3.38768e+07	6387.32	8.24399e+08	17592.6	32799.3	2.34511e+06	4.31679e+06
AU22A119	WI73	K feldspar		16.8254	0.0410455	15.654	0.0441679	36.9666	0.116896			1569.65	28527.9	487912	454326	1.08555e+06	145.92	38.799	2.30249e+08	25137.4	7.19619e+08	3.63344e+07	14296.7	8.10936e+08	47751	71633.4	3.13772e+06	4.72337e+06
AU22A120	WI73	K feldspar		16.7834	0.0327314	15.5969	0.0380718	36.8678	0.0916566			1190.57	29390.6	501404	466374	1.11544e+06	75.5706	68.6022	2.38195e+08	28455.5	7.67471e+08	3.97509e+07	20752.9	9.17085e+08	50851.6	89015.6	3.43178e+06	4.75911e+06
AU22A121	WI73	K feldspar		16.8101	0.0390932	15.6245	0.0347634	36.8732	0.0851357			1181.03	36929.5	631012	587059	1.40184e+06	39.5061	125.442	2.25656e+08	37280.7	8.22524e+08	4.45247e+07	2213.6	1.08594e+09	47721.1	47758.3	3.49985e+06	5.21668e+06
AU22A122	WI73	K feldspar		16.8369	0.0316921	15.6081	0.0389644	36.9507	0.0802084			1559.63	31898.7	545914	506573	1.21349e+06	86.4354	83.2525	2.52019e+08	30092.2	7.83871e+08	4.0877e+07	37475.4	9.41261e+08	56325.1	104133	3.58036e+06	4.56162e+06
AU22A123	WI73	K feldspar		16.8669	0.0359733	15.6754	0.0393452	37.0923	0.0876275			1551.98	31049.9	532330	495238	1.18579e+06	244.676	165.447	2.22248e+08	121467	7.48242e+08	3.78747e+07	37144.5	8.67474e+08	49784.2	110579	3.32606e+06	4.84268e+06
Wilkes	Fold Island	Ford Granite fine-grained
AU22A009	WI72	K feldspar		16.8024	0.0384589	15.6036	0.0429296	36.9385	0.101294			4239.83	31705.2	543936	506633	1.21492e+06	572.487	499.496	2.17368e+08	41188.8	7.48884e+08	4.03179e+07	34979	8.95085e+08	57938.7	111411	2.60476e+06	3.74058e+06
AU22A010	WI72	K feldspar		16.7738	0.0447076	15.6163	0.0627492	36.9647	0.109058			3815.08	29736.5	509257	475488	1.14007e+06	53.2421	66.4836	1.98933e+08	22368.6	6.99133e+08	3.6569e+07	39415.7	8.14741e+08	54901.8	95961.9	1.81466e+06	3.5763e+06
AU22A011	WI72	K feldspar		16.7983	0.0369989	15.6051	0.0434698	37.1846	0.112993			2433.08	36135.5	619708	577306	1.39339e+06	1743.4	1005.71	2.12524e+08	56511.1	7.42947e+08	4.10355e+07	27000.6	9.27138e+08	44188.6	106886	2.32099e+06	3.72797e+06
AU22A012	WI72	K feldspar		16.8025	0.0659423	15.5964	0.055177	37.0056	0.102784			2400.63	44261.1	759195	706624	1.69818e+06	349.895	493.308	1.84744e+08	60529.4	7.79299e+08	4.32354e+07	12590.3	1.04749e+09	27701.3	79583	2.09029e+06	4.74624e+06
AU22A013	WI72	K feldspar		16.7795	0.0485633	15.584	0.0479314	37.0901	0.114498			3250.61	22104.6	378609	352565	849878	314.578	492.45	1.96269e+08	43206.7	6.48454e+08	3.31207e+07	26311.1	7.08468e+08	55190.1	76369.4	1.53617e+06	2.7923e+06
AU22A014	WI72	K feldspar		16.7153	0.0315895	15.5036	0.0459412	36.8088	0.141584			3012.45	38275.9	653041	607256	1.46021e+06	21.8021	195.457	2.14519e+08	50164.3	8.03106e+08	4.34636e+07	23519.1	1.02518e+09	42595.5	113841	2.24538e+06	3.99495e+06
AU22A015	WI72	K feldspar		16.7366	0.0441989	15.5579	0.0527287	36.8505	0.104323			2580	28583	488256	454998	1.09147e+06	35.2483	132.561	1.8796e+08	38878.4	6.76041e+08	3.47965e+07	36883.3	7.77322e+08	41648.6	85842.1	1.93393e+06	3.44573e+06
AU22A016	WI72	K feldspar		16.7821	0.0539066	15.5463	0.0486142	36.9304	0.134426			2492.83	26002.9	445362	413562	994924	8.64197	50	1.87038e+08	38333.5	6.68513e+08	3.4304e+07	33791.3	7.62758e+08	40146.1	78209.2	2.20731e+06	3.15921e+06
AU22A017	WI72	K feldspar		16.8133	0.0385174	15.6169	0.0419395	37.0043	0.0858108			2250.78	43112.8	739733	688700	1.6526e+06	121.641	262.172	2.28562e+08	49042.2	7.90055e+08	4.27736e+07	18678.6	9.69121e+08	31037.9	80646.5	2.10704e+06	4.4801e+06
AU22A018	WI72	K feldspar		16.7231	0.0371995	15.5177	0.0433373	36.8159	0.110212			2543.19	30448	519595	483231	1.16099e+06	87.8519	478.021	1.88712e+08	64237.8	6.96144e+08	3.59695e+07	40118.6	8.07058e+08	47528	116271	2.38275e+06	3.49426e+06
Wilkes	Fold Island	Ford Granite coarse-grained
AU22A058	WI70	K feldspar		16.8197	0.0274754	15.6327	0.0328601	37.0159	0.0740154			2455.18	30677.4	525405	488448	1.17014e+06	243.985	131.696	2.08985e+08	33921.7	6.7348e+08	3.41396e+07	44910.5	7.47038e+08	39924.9	67004.2	1.32134e+06	3.84639e+06
AU22A059	WI70	K feldspar		16.7836	0.0388904	15.5873	0.0477088	37.006	0.102026			2440.69	35385.8	604719	561740	1.34927e+06	482.329	339.55	2.63333e+08	42054.3	8.0439e+08	4.24052e+07	10474.7	9.31821e+08	50866.7	56395.9	1.38169e+06	4.01002e+06
AU22A060	WI70	K feldspar		16.8129	0.0257354	15.5991	0.0293407	37.0761	0.0898076			2702.49	36498	624788	579793	1.3942e+06	804.484	2607.72	2.26171e+08	67923.9	7.75129e+08	4.0357e+07	17190.8	9.14825e+08	46502.7	59873.5	1.42644e+06	4.11905e+06
AU22A061	WI70	K feldspar		16.7405	0.038395	15.5185	0.0384254	36.8374	0.0967801			2581.51	34905.5	594930	551596	1.32468e+06	114.326	88.2143	2.25104e+08	21777.3	7.57466e+08	3.87416e+07	74580.7	8.62097e+08	50797	93507.6	1.13208e+06	4.04572e+06
AU22A062	WI70	K feldspar		16.8206	0.04936	15.6323	0.0591083	37.0968	0.118243			2590.77	34630.1	593035	551220	1.32338e+06	888.09	1044.1	2.49893e+08	49186.1	7.64651e+08	3.96676e+07	123362	8.57056e+08	58385.7	97082.4	1.56373e+06	3.82522e+06
AU22A063	WI70	K feldspar		16.8069	0.0544907	15.6029	0.0496388	37.0211	0.132899			2516.7	34932.2	597696	554952	1.33211e+06	1521.6	3716.11	2.60631e+08	86847.1	8.04618e+08	4.15978e+07	138263	9.12133e+08	65171.6	101389	1.95545e+06	3.53154e+06
AU22A064	WI70	K feldspar		16.8323	0.0478495	15.6247	0.0474832	37.0711	0.0963448			2530.19	40922.3	701216	650980	1.56253e+06	2099.32	1937.95	2.6584e+08	88138.9	7.97324e+08	4.21906e+07	55871.3	9.39504e+08	44186	83280.6	1.66602e+06	4.37847e+06
AU22A065	WI70	K feldspar		16.7877	0.0415245	15.616	0.0453733	36.975	0.103427			2276.08	30459.1	520521	484236	1.15992e+06	197.201	305.019	2.41164e+08	22495.5	7.17402e+08	3.67016e+07	26270.2	7.83449e+08	45284.8	51582.4	1.23891e+06	3.81065e+06
AU22A066	WI70	K feldspar		16.7325	0.0424015	15.5439	0.0381931	36.7949	0.100523			1837.04	39033.7	664835	617656	1.47911e+06	1453.37	1266.7	2.19281e+08	70204.8	7.88505e+08	4.1378e+07	25982.4	9.62256e+08	45411.8	57407.5	920285	4.38006e+06
AU22A067	WI70	K feldspar		16.7754	0.0578918	15.5671	0.0559974	36.9501	0.117476			1928.68	37487.5	640111	594039	1.42642e+06	6008.89	2622.13	1.94648e+08	51738.1	7.76467e+08	4.1207e+07	12572.8	1.001e+09	15915	28409.5	5.83227e+06	3.59768e+06
Wilkes	Fold Island	Ford Granite coarse-grained
AU22A029	WI69	K feldspar		16.7591	0.0670147	15.5913	0.0778745	36.9445	0.155738			2446.64	46529	795191	740900	1.77726e+06	33711.2	2861.84	2.45788e+08	387441	8.34949e+08	4.4644e+07	132931	1.00065e+09	48086.3	45440.8	4.89397e+06	3.62167e+06
AU22A030	WI69	K feldspar		16.7559	0.049921	15.5944	0.0529383	36.9005	0.120735			2804.51	33666.9	575235	536137	1.28425e+06	247.386	55.8248	1.73893e+08	33810.6	6.85466e+08	3.55908e+07	46260.3	8.34267e+08	14407	21670.2	646362	2.81668e+06
AU22A031	WI69	K feldspar		16.8484	0.0739618	15.6909	0.0569331	37.1178	0.164838			2436.3	36109	620331	578518	1.38532e+06	133.666	28.859	1.25032e+08	35685.4	6.3727e+08	3.34747e+07	45342.5	8.36972e+08	12337.5	20927.4	718635	2.61486e+06
AU22A032	WI69	K feldspar		16.7856	0.0391142	15.5836	0.040506	36.853	0.098301			2278.05	50721.1	868057	806972	1.93175e+06	781.137	605.484	2.00374e+08	108633	8.42971e+08	4.77361e+07	65888.2	1.20683e+09	14566.6	28961.6	2.73562e+06	3.57089e+06
AU22A033	WI69	K feldspar		16.7735	0.0349467	15.641	0.0485131	37.0481	0.132115			2807.28	37008.1	632878	590901	1.41675e+06	177.307	124.589	1.64525e+08	41495.5	6.46038e+08	3.3671e+07	45569.3	7.88725e+08	16622.8	26270.2	607289	2.92681e+06
AU22A034	WI69	K feldspar		16.7747	0.0389949	15.5994	0.0436001	36.9582	0.111323			2668.96	39705.4	679016	632211	1.51611e+06	251.715	168.339	1.90662e+08	89448.8	7.58864e+08	4.03069e+07	44208.2	9.55199e+08	15348.3	20955	1.1134e+06	3.23754e+06
AU22A035	WI69	K feldspar		16.7859	0.0477606	15.534	0.0562412	36.8904	0.111756			2493.04	44931.6	768861	712351	1.71229e+06	182.417	218.826	2.44975e+08	67753.7	8.15189e+08	4.26841e+07	195668	9.59809e+08	51925.5	101099	1.47593e+06	3.9696e+06
AU22A036	WI69	K feldspar		16.7326	0.0371831	15.5412	0.0304663	36.8341	0.111475			2373.5	47038.4	802313	746018	1.78961e+06	793.305	993.537	3.31133e+08	135106	8.42324e+08	4.51903e+07	207814	9.22247e+08	54515.6	104434	4.05438e+06	4.08195e+06
AU22A037	WI69	K feldspar		16.7479	0.0360131	15.5803	0.040322	36.9239	0.107926			2390.76	53475.4	912892	850149	2.03921e+06	580.874	393.257	1.96771e+08	71491.6	7.4507e+08	3.95945e+07	60021.7	9.31784e+08	18196	64414.2	815107	4.2105e+06
AU22A038	WI69	K feldspar		16.7239	0.0263709	15.6018	0.039556	36.8862	0.0894446			2260.69	43792.2	746474	697095	1.66803e+06	451.509	283.587	2.37704e+08	78899.1	7.68859e+08	4.03646e+07	165523	8.97476e+08	44517.9	93226	1.36678e+06	3.64005e+06
AU22A039	WI69	K feldspar		16.7493	0.0415836	15.5986	0.043901	36.9477	0.132107			2067.88	40760	695803	648627	1.55493e+06	642.629	437.027	1.91365e+08	109507	7.14057e+08	3.76762e+07	47709.5	8.78161e+08	15890.2	36800.2	1.0313e+06	3.13842e+06
Wilkes	Clark Peninsula	orthogneiss
AU22A068	WI43	K feldspar		16.5598	0.0541621	15.5449	0.0442451	36.7861	0.133087			2278.43	87310.5	1.47164e+06	1.38151e+06	3.30725e+06	1.47059	55.1472	1.78737e+08	81621.1	8.19411e+08	4.37495e+07	42710.5	1.13896e+09	31547.2	28726	3.69245e+06	1.52644e+07
AU22A069	WI43	K feldspar		16.6815	0.0384528	15.6316	0.0434786	36.8796	0.116996			2396.27	68333.1	1.16019e+06	1.0872e+06	2.59483e+06	7.87036	81.4816	1.80228e+08	52049.3	8.07989e+08	4.34153e+07	38963.2	1.11707e+09	24440.5	27020.4	2.3904e+06	1.38603e+07
AU22A070	WI43	K feldspar		16.6142	0.0287465	15.5898	0.0326431	36.763	0.0907975			2443.67	57292.8	968785	909063	2.16859e+06	19.3995	95.6125	1.20964e+08	43612.2	7.41463e+08	3.8118e+07	36199.7	1.01899e+09	22117.6	22888.7	2.86855e+06	1.46524e+07
AU22A071	WI43	K feldspar		16.6331	0.0486788	15.5816	0.0492823	36.7397	0.114045			2185.2	50741.6	858950	804651	1.91929e+06	2.26629	13.6939	1.45536e+08	46054.2	6.90768e+08	3.50741e+07	12533.9	8.74849e+08	24934.5	17365.8	2.53198e+06	1.24273e+07
AU22A072	WI43	K feldspar		16.6339	0.0243442	15.5943	0.0308363	36.7986	0.0777092			2312.75	59530.6	1.00774e+06	944750	2.25523e+06	12.7021	79.4461	8.34071e+07	48673.9	7.25547e+08	3.73493e+07	15525.9	1.0389e+09	20263.3	18635	1.98194e+06	1.52535e+07
AU22A073	WI43	K feldspar		16.6643	0.0306289	15.611	0.0367663	36.8994	0.0904322			2003.86	75545.5	1.28113e+06	1.20014e+06	2.86961e+06	9.23787	175.723	1.35865e+08	45710.2	8.11112e+08	4.26324e+07	41475	1.14179e+09	23330.1	24098.9	2.24834e+06	1.55899e+07
AU22A074	WI43	K feldspar		16.6633	0.0241923	15.6173	0.0318469	36.9314	0.0753149			1876.05	73708.7	1.24986e+06	1.17138e+06	2.80213e+06	49.842	344.612	1.07544e+08	56461.2	8.59278e+08	4.55888e+07	21820	1.27223e+09	23597.8	22990.6	2.59766e+06	1.86393e+07
AU22A075	WI43	K feldspar		16.6092	0.0356641	15.5871	0.031644	36.7595	0.0807351			1871.78	73244.1	1.23791e+06	1.16169e+06	2.77138e+06	6.08806	53.5249	9.3043e+07	45541.1	8.05704e+08	4.24439e+07	31097.9	1.20141e+09	19628.4	19168.3	2.57811e+06	1.69516e+07
AU22A076	WI43	K feldspar		16.607	0.0393102	15.5826	0.0329019	36.8408	0.0956088			2051.39	83252.8	1.40683e+06	1.32e+06	3.15691e+06	49.5964	198.849	9.88849e+07	72249.7	8.06708e+08	4.24831e+07	42664.7	1.19041e+09	24800.4	29112.4	2.64632e+06	1.86394e+07
AU22A077	WI43	K feldspar		16.6107	0.0385254	15.5703	0.0427102	36.7544	0.107432			1864.35	74325	1.25621e+06	1.17747e+06	2.81163e+06	2.07373	36.1751	1.14403e+08	46326	7.68399e+08	3.98362e+07	25251.4	1.08542e+09	21845.7	21583.7	2.23177e+06	1.74264e+07
Wilkes	Clark Peninsula	orthogneiss
AU22A104	WI80	K feldspar		16.8334	0.0482233	15.6956	0.0388195	37.012	0.104662			1663.46	45455.6	777995	725615	1.73098e+06	902.957	347.442	2.00278e+08	134264	7.71193e+08	4.02347e+07	25838.2	9.80765e+08	35744.8	33574.3	2.81783e+06	9.91988e+06
AU22A105	WI80	K feldspar		16.689	0.0550259	15.5482	0.0525378	36.6688	0.131339			1596.48	38598.6	654951	610376	1.45626e+06	540.755	126.355	1.48269e+08	27127.2	7.7165e+08	4.09349e+07	760.914	1.08772e+09	21152.7	13840.1	2.65407e+06	9.93383e+06
AU22A106	WI80	K feldspar		16.7536	0.0412347	15.6238	0.0457538	36.7636	0.110433			1669.4	38596.5	657437	613315	1.45997e+06	45.5696	97.1272	6.65006e+07	34130.5	6.41818e+08	3.24775e+07	13281.6	9.24474e+08	12559.7	20800.5	1.27828e+06	9.07607e+06
AU22A107	WI80	K feldspar		16.7898	0.0768371	15.5308	0.0557116	36.6356	0.155622			1709.44	40648.3	693870	642084	1.53226e+06	2117.81	532.13	1.95335e+08	57123.5	7.99081e+08	4.24733e+07	32438.5	1.06741e+09	36901.6	25773.3	3.18373e+06	1.06283e+07
AU22A108	WI80	K feldspar		16.6595	0.0366928	15.5666	0.0452921	36.5596	0.112298			1807.59	41715.3	706546	660465	1.56926e+06	120.148	354.636	9.98583e+07	52219.4	6.96067e+08	3.57132e+07	7415.38	9.84925e+08	11065.3	20085.4	1.82299e+06	9.9148e+06
AU22A109	WI80	K feldspar		16.7892	0.0394437	15.565	0.0382113	36.6554	0.0941325			1678.18	34420.6	587521	544923	1.29827e+06	446.404	495.518	2.36134e+08	36854	7.67126e+08	4.04116e+07	17025.2	9.39588e+08	27922.7	22660.5	2.13417e+06	9.51575e+06
AU22A110	WI80	K feldspar		16.8158	0.0460144	15.681	0.0359596	36.8513	0.105884			1612.14	38075.6	650923	607287	1.44384e+06	7711.38	2071.39	8.96578e+07	63363.7	7.67611e+08	4.07287e+07	4264.86	1.1688e+09	11326.2	20558.6	2.35294e+06	1.10277e+07
AU22A111	WI80	K feldspar		16.7692	0.0507728	15.6417	0.0490454	36.7868	0.109323			1675.85	46412.6	791239	738419	1.75696e+06	733.722	427.169	1.38866e+08	20739.6	7.5148e+08	3.97006e+07	6748.39	1.07475e+09	16729.4	24395.2	1.27391e+06	1.02817e+07
AU22A112	WI80	K feldspar		16.7471	0.0434388	15.6072	0.0502839	36.7422	0.0958677			1583.56	45477.4	774258	721956	1.71952e+06	541.891	107.163	1.10278e+08	41161.6	8.10906e+08	4.30162e+07	12674.7	1.21454e+09	12421.9	25465.6	1.79547e+06	1.15389e+07
AU22A113	WI80	K feldspar		16.7953	0.0366165	15.6244	0.0424381	36.7599	0.107605			1486.39	42460.2	724960	674817	1.60627e+06	1607.05	380.579	1.57442e+08	55812.1	7.8368e+08	4.13499e+07	17188.4	1.0887e+09	13428	25404.5	1.21874e+06	1.12393e+07
Wilkes	Robinson Ridge	Ardery Charnockite coarse-grained
AU22A094	WI84	K feldspar		16.7561	0.0452374	15.6177	0.0440339	36.8642	0.107587			1653.38	38156.8	650225	606088	1.44716e+06	966.182	688.892	1.4821e+08	893480	8.952e+08	4.71726e+07	17485	1.26959e+09	66559.4	215752	1.16224e+07	1.85709e+07
AU22A095	WI84	K feldspar		16.6919	0.0324398	15.5415	0.0315387	36.681	0.0870036			1842.32	37707.9	640096	596029	1.42302e+06	4.1485	9.2171	9.52097e+07	22425.8	7.05867e+08	3.62443e+07	11277.2	9.80956e+08	24461	158496	2.08825e+06	1.79199e+07
AU22A096	WI84	K feldspar		16.8245	0.0562978	15.6721	0.0479119	36.9279	0.10581			1593.13	26218.9	448593	417907	996106	2136.45	835.898	1.29919e+08	25588.4	7.21847e+08	3.65173e+07	14870.3	9.43007e+08	50357.1	194016	2.9243e+06	1.61324e+07
AU22A097	WI84	K feldspar		16.7448	0.0258067	15.586	0.0304553	36.7836	0.0833073			2102.55	28419.9	483937	450499	1.07551e+06	113.374	106.511	1.2808e+08	42413.7	7.30449e+08	3.73371e+07	13783.2	9.75402e+08	46944.6	171516	3.38142e+06	1.56262e+07
AU22A098	WI84	K feldspar		16.6716	0.0479298	15.5461	0.040595	36.6312	0.103907			1956.18	28670.3	486053	453304	1.08049e+06	2275.25	773.262	1.27531e+08	40763.6	7.46873e+08	3.80112e+07	14501.1	9.99642e+08	54464.5	222080	4.12007e+06	1.56467e+07
AU22A099	WI84	K feldspar		16.8161	0.0215927	15.6648	0.0346977	36.9789	0.0754688			1896.22	36210	619183	576882	1.37759e+06	22.6501	76.3564	9.96072e+07	34387.9	7.40315e+08	3.80386e+07	9646.21	1.04235e+09	29897.5	161315	2.45829e+06	2.04365e+07
AU22A100	WI84	K feldspar		16.807	0.0443438	15.6445	0.041185	36.894	0.113501			1656.52	25564.2	436895	406751	970352	8860.24	2105.11	1.37912e+08	57865.1	7.47184e+08	3.79775e+07	13525.1	9.77047e+08	63037.4	182071	3.50862e+06	1.66103e+07
AU22A101	WI84	K feldspar		16.7429	0.0369591	15.5847	0.0358636	36.7649	0.0852072			1764.95	26848.2	457079	425549	1.01553e+06	160.644	36.7882	1.51926e+08	31733.5	7.51873e+08	3.81901e+07	14348.3	9.71139e+08	68214.5	136971	3.43825e+06	1.56281e+07
AU22A102	WI84	K feldspar		16.7151	0.0347789	15.5702	0.0368635	36.6439	0.0874212			1775.28	26895	457104	425895	1.01396e+06	9.87715	6.68202	1.17979e+08	50758.1	6.84235e+08	3.43188e+07	11980.7	8.95561e+08	41433.5	153225	2.70085e+06	1.47682e+07
AU22A103	WI84	K feldspar		16.7615	0.0514985	15.5891	0.0433323	36.7838	0.118554			1648.04	27156.7	462824	430563	1.02775e+06	23.663	93.1504	1.17889e+08	41677.1	7.47281e+08	3.7969e+07	14069	1.00931e+09	51310.8	123534	3.15424e+06	1.5132e+07
Wilkes	Robinson Ridge	Ardery Charnockite fine-grained
AU22A078	WI85	K feldspar		16.7476	0.0506589	15.6032	0.0565455	36.7547	0.138085			2404.32	26627.8	453743	422721	1.00727e+06	100.001	183.818	1.71783e+08	57777.4	8.33384e+08	4.22904e+07	15359.1	1.06524e+09	85445.8	129147	3.49818e+06	1.53932e+07
AU22A079	WI85	K feldspar		16.7502	0.050374	15.6191	0.0477989	36.6882	0.116195			2476.23	27491.6	468522	436863	1.03802e+06	61.1442	133.488	1.37745e+08	36845.7	7.46608e+08	3.7656e+07	14786.1	9.58059e+08	75034.6	155163	2.95212e+06	1.42253e+07
AU22A080	WI85	K feldspar		16.7375	0.0330963	15.6043	0.0376948	36.7119	0.0869939			2383.26	31812.7	541733	505032	1.20191e+06	217.282	369.781	1.06871e+08	498329	7.60077e+08	3.82835e+07	12444.9	1.03633e+09	54942.7	68985.4	3.4471e+06	1.65295e+07
AU22A081	WI85	K feldspar		16.6583	0.0252899	15.4999	0.034525	36.6028	0.0967942			2355.77	36094.2	611713	569149	1.35957e+06	8.06451	41.2442	1.39789e+08	21977.2	7.63973e+08	3.89021e+07	13253.7	1.00167e+09	45946.4	180756	2.74775e+06	1.76171e+07
AU22A082	WI85	K feldspar		16.721	0.0358637	15.5873	0.0393031	36.8381	0.0879003			2486.45	32418.4	551469	514055	1.22892e+06	398.109	824.33	1.35252e+08	197340	8.56078e+08	4.41342e+07	19036.2	1.18682e+09	79893.7	115199	4.72941e+06	1.72002e+07
AU22A083	WI85	K feldspar		16.8396	0.0380991	15.6677	0.040236	37.0183	0.104386			2049.11	43579.6	746563	694581	1.66005e+06	24.6546	23.0108	8.7374e+07	22013.9	8.00801e+08	4.22009e+07	7666.39	1.19507e+09	20355.6	87318.7	2.61462e+06	2.20119e+07
AU22A090	WI85	K feldspar		16.7489	0.0400898	15.5774	0.0399272	36.7343	0.106281			2175.5	32469.9	553134	514450	1.22718e+06	89.0278	305.294	8.88638e+07	63945.4	7.42035e+08	3.76178e+07	15706.8	1.02662e+09	58764.7	167777	3.02645e+06	1.55456e+07
AU22A091	WI85	K feldspar		16.7546	0.0313253	15.5775	0.0488255	36.6832	0.093415			2019.33	26767.3	456132	424094	1.01023e+06	55.221	218.495	1.43367e+08	51363.3	7.3678e+08	3.70976e+07	14856.1	9.36566e+08	69325.9	108737	2.78517e+06	1.77377e+07
AU22A092	WI85	K feldspar		16.772	0.0489963	15.6246	0.055245	36.8591	0.119705			1725.66	35886.7	612151	570295	1.36089e+06	3037.97	1229.95	7.57552e+07	202731	7.06428e+08	3.59693e+07	15691.2	1.01332e+09	22188	58916.3	4.72607e+06	1.82217e+07
AU22A093	WI85	K feldspar		16.7565	0.0244352	15.6222	0.0325198	36.8735	0.0893825			1639.22	38462.2	655462	611122	1.45912e+06	49.3828	102.02	1.071e+08	24063.7	7.17322e+08	3.66543e+07	11827.4	9.85663e+08	29481.1	178992	1.93645e+06	1.8296e+07
Rayner	Chapman Ridge	Mawson Charnokite
AU10A028	RW28	K feldspar		17.9383	0.0307772	15.8853	0.0474543	38.0629	0.0828648			1762.6	29021.5	529708	470030	1.13925e+06	12.7017	51.5628	1.15731e+08	40014	6.31699e+08	3.33269e+07	51580.9	8.96578e+08	38852	57785.9	1.1987e+06	6.57278e+06
AU10A029	RW28	K feldspar		18.0372	0.0433357	15.954	0.0675483	38.1749	0.129222			1485.09	30103.7	552461	489663	1.18519e+06	156.465	246.922	1.05706e+08	3.51701e+06	6.47359e+08	3.40413e+07	98433.5	9.29293e+08	36903.3	74666.2	1.4339e+07	8.2857e+06
AU10A030	RW28	K feldspar		17.8771	0.0659489	15.8384	0.0766104	37.7818	0.151066			1330.08	28528	518872	460668	1.11156e+06	165.905	111.467	1.37797e+08	2.41259e+06	6.99046e+08	3.77925e+07	100688	1.00746e+09	49418	80122.9	1.04855e+07	6.46792e+06
AU10A031	RW28	K feldspar		17.91	0.0536465	15.8123	0.0466379	38.0856	0.0862036			1506.53	40181.4	732134	647777	1.57818e+06	141.43	506.114	1.28277e+08	3.78954e+06	6.96041e+08	3.78227e+07	101553	1.02455e+09	38852.6	53012.2	1.45423e+07	8.68501e+06
AU10A032	RW28	K feldspar		17.9862	0.0481536	15.9018	0.0291322	38.1793	0.0956132			1459.17	30002.1	548957	486407	1.18125e+06	73.6033	121.313	1.38579e+08	2.51846e+06	6.40285e+08	3.34405e+07	89768.3	8.63613e+08	47281	112865	1.04144e+07	6.69092e+06
AU10A033	RW28	K feldspar		17.9749	0.0411954	15.9149	0.0385355	38.1074	0.0915368			1454.4	31183.6	570192	505976	1.22544e+06	1731.77	299.655	1.14059e+08	3.69129e+06	6.46351e+08	3.39484e+07	90851.7	9.16754e+08	42425.6	63862.8	1.61481e+07	7.07155e+06
AU10A034	RW28	K feldspar		17.9351	0.0314616	15.8764	0.0350055	38.0236	0.0791309			1344	29443.1	537147	476580	1.15447e+06	79.9039	495.763	1.3015e+08	2.54215e+06	6.6093e+08	3.48578e+07	94185.7	9.2364e+08	48392.4	79183.8	1.0648e+07	7.44393e+06
AU10A035	RW28	K feldspar		17.9735	0.0434351	15.9273	0.0296743	38.221	0.0791098			1186.07	29592.3	541000	480527	1.16633e+06	42.5779	122.819	1.10974e+08	1.76433e+06	6.26744e+08	3.29724e+07	103447	9.00603e+08	37577.3	55603.2	7.91967e+06	6.70942e+06
AU10A036	RW28	K feldspar		17.9529	0.0396733	15.9274	0.0218198	38.0979	0.0739876			1162.31	35831.2	654274	581836	1.40765e+06	396.198	367.047	1.2477e+08	7.29313e+06	6.71001e+08	3.65311e+07	94340	1.00502e+09	34098.2	54601.5	2.74386e+07	7.23825e+06
AU10A037	RW28	K feldspar		17.9512	0.0432612	15.9137	0.0569014	38.0497	0.111211			1102.87	36096.2	659019	585635	1.41624e+06	3.34821	91.7092	1.5495e+08	3.20458e+06	7.11827e+08	3.88598e+07	118153	1.03453e+09	49450.1	81638.6	1.27588e+07	7.07605e+06
Rayner	Mt Horden	Mawson Charnokite
AU10A159	LF60	K feldspar		18.3309	0.0442274	15.9921	0.0358776	38.9066	0.094426			670.635	17931.5	333496	292702	719606	287.794	92.6345	9.4128e+07	621995	5.90112e+08	3.51976e+07	9229.4	9.25041e+08	23684	92403.8	6.85098e+06	9.50949e+06
AU10A160	LF60	K feldspar		18.2975	0.0681189	15.9565	0.0585381	38.8621	0.141582			713.582	16627.8	308688	270823	666541	2.50828	42.4914	7.2411e+07	685171	5.10019e+08	2.63365e+07	7507.49	7.5239e+08	19093.5	56083.4	2.24769e+07	8.93465e+06
AU10A161	LF60	K feldspar		18.3067	0.0362524	15.9916	0.0289017	39.0017	0.067853			717.923	22442.8	416854	366346	902893	99.1877	29.01	1.00752e+08	39457.6	6.07396e+08	3.28607e+07	9419.9	9.37103e+08	32266.4	80583.4	1.98632e+06	1.01511e+07
AU10A162	LF60	K feldspar		18.3006	0.0582692	15.9727	0.0508174	38.833	0.115057			674.09	17302.6	321274	282113	693102	3.91037	5.34521	8.0218e+07	394358	5.2402e+08	2.6914e+07	7310.75	7.61588e+08	25220.3	49447.6	4.55993e+06	8.60363e+06
AU10A163	LF60	K feldspar		18.3496	0.0408081	15.9813	0.0431021	38.888	0.0960947			655.649	16620.5	309441	271145	666741	697.544	579.177	8.22565e+07	364309	5.25856e+08	2.69093e+07	7655.03	7.58207e+08	32428.1	108785	7.37424e+06	8.30098e+06
AU10A164	LF60	K feldspar		18.3498	0.0407529	16.0256	0.0344632	38.9726	0.0845335			595.086	18197.4	338804	297699	731601	352.859	57.133	7.43694e+07	4600.65	5.04881e+08	2.59315e+07	7822.24	7.37834e+08	18455.5	79948.1	1.23743e+06	8.09292e+06
AU10A165	LF60	K feldspar		18.3236	0.0616034	15.9865	0.0572057	39.0114	0.118275			535.688	15673.6	291402	255791	630778	895.099	254.381	7.09423e+07	4120.69	4.90947e+08	2.50161e+07	6831.26	7.06009e+08	28687.5	79989.2	1.04382e+06	7.59779e+06
AU10A166	LF60	K feldspar		18.3553	0.0504976	16.0311	0.0606149	39.0033	0.113098			516.514	16638.3	309874	272298	669479	33.0126	40.3744	7.83154e+07	180580	5.37304e+08	2.85931e+07	9248.57	8.33534e+08	19754.4	75855.4	6.56238e+06	8.35575e+06
AU10A167	LF60	K feldspar		18.3094	0.0349512	16.0172	0.0257483	38.9635	0.0455434			619.678	18254.7	339134	298501	733790	22.6119	21.3398	8.96679e+07	694919	5.97814e+08	3.23544e+07	8344.24	9.32513e+08	36068.5	33945.7	5.68753e+06	1.01914e+07
AU10A168	LF60	K feldspar		18.3414	0.0432042	15.9955	0.0309135	39.0357	0.0780135			588.555	15951.6	296868	260493	642414	1150.31	547.551	8.2383e+07	190128	5.40662e+08	2.83849e+07	7113.04	8.06459e+08	23976.1	54475.8	4.88088e+06	8.64653e+06
Rayner	Mawson Station	Mawson Charnokite
AU10A197	90030	K feldspar		18.3321	0.0484801	15.9322	0.0491846	38.94	0.118058			874.278	16606.2	309055	270327	667728	336.643	443.729	8.42586e+07	23755.4	5.34428e+08	2.76747e+07	16268.3	7.89153e+08	25499.3	95262.6	3.33511e+06	8.3184e+06
AU10A198	90030	K feldspar		18.3816	0.0453502	16.0244	0.0529015	39.1969	0.138292			778.993	17422.2	325126	285261	705188	928.776	447.575	8.74438e+07	118956	5.55436e+08	2.91493e+07	21803.8	8.2563e+08	36993.9	90836.4	3.7474e+06	8.54907e+06
AU10A199	90030	K feldspar		18.2929	0.0688	15.9359	0.0463955	38.864	0.131732			652.071	18931.9	351602	308277	759813	477.623	1110.37	9.69384e+07	34312.7	5.69767e+08	3.04182e+07	22412.4	8.68265e+08	29434	103971	3.5435e+06	9.04385e+06
AU10A200	90030	K feldspar		18.2565	0.0522592	15.9063	0.0448003	38.7668	0.111532			638.092	18088.5	335279	294006	724173	727.809	543.61	9.61924e+07	26360.8	5.77269e+08	3.08783e+07	20305.2	8.82131e+08	31285.8	113413	3.78137e+06	8.91603e+06
AU10A201	90030	K feldspar		18.3348	0.0396713	15.9845	0.0328299	38.9418	0.101046			664.472	19989.8	372121	326518	803937	8200.97	1574.73	9.71445e+07	23951.2	5.72995e+08	3.15141e+07	22674	8.98838e+08	21535.3	96304.2	3.17002e+06	9.44196e+06
AU10A202	90030	K feldspar		18.3953	0.0652906	15.979	0.0561835	39.0955	0.165883			826.227	16609.5	310222	271217	670648	404.97	373.844	8.17229e+07	174426	5.32775e+08	2.77022e+07	17226.2	7.85528e+08	27908.8	103526	4.16865e+06	8.35552e+06
AU10A203	90030	K feldspar		18.3426	0.023804	15.9437	0.0251764	39.0352	0.0489651			802.904	16614.3	309431	270705	669835	1567.96	1053.72	7.573e+07	20647	5.0767e+08	2.59943e+07	20051.5	7.37057e+08	26562.6	78129.1	2.41183e+06	7.76856e+06
AU10A204	90030	K feldspar		18.4424	0.0801798	15.9786	0.0790068	39.0388	0.173143			719.123	16729.2	313274	273182	674552	798.475	871.033	8.61241e+07	24949.4	5.37766e+08	2.79219e+07	21164.9	7.90941e+08	31723.6	119425	3.79398e+06	8.51956e+06
AU10A205	90030	K feldspar		18.5391	0.0763413	16.0854	0.0732965	39.2559	0.172345			704.843	16481.8	310269	270951	668296	1137.49	1549.87	8.2865e+07	25273	5.31818e+08	2.76626e+07	15894.4	7.82578e+08	27288.8	113307	3.49933e+06	8.59356e+06
AU10A206	90030	K feldspar		18.4567	0.0293645	16.0269	0.0262135	39.1964	0.0835213			791.091	20400.9	382350	334170	825986	2334.73	1813.32	1.08042e+08	25508.6	6.09874e+08	3.33035e+07	25610.9	9.47105e+08	29904	113387	3.38422e+06	1.00967e+07
Rayner	Mawson Station	Mawson Charnokite
AU22A040	LM53	K feldspar		18.2478	0.0405716	15.9024	0.0361074	38.7904	0.0959764			1610.99	33683	574411	534434	1.27894e+06	38.6022	141.783	7.55778e+07	936074	7.38101e+08	3.83241e+07	26272.9	1.03542e+09	50237.5	98556.7	8.27264e+06	1.27078e+07
AU22A041	LM53	K feldspar		18.3202	0.072386	15.9736	0.0619342	39.0018	0.150476			1885.91	26366.3	450593	418993	1.00389e+06	77.1796	57.5092	1.00357e+08	49434.5	7.50619e+08	3.93353e+07	27560.5	1.04216e+09	35460.4	103668	4.09066e+06	1.20225e+07
AU22A042	LM53	K feldspar		18.3481	0.0530234	15.9421	0.0586992	38.9641	0.128415			1783.4	24879.5	426115	395523	947105	151.033	63.5146	9.96667e+07	1.27408e+06	7.44189e+08	3.8586e+07	31489.4	1.0226e+09	34055.6	98832.8	1.07921e+07	1.32003e+07
AU22A043	LM53	K feldspar		18.2344	0.0402427	15.8589	0.0482165	38.7187	0.127505			1672.29	34094.2	581774	539582	1.29356e+06	2343.17	190.457	1.08931e+08	269116	8.0624e+08	4.26495e+07	20206.7	1.14191e+09	24691.9	91642.9	4.65451e+06	1.41612e+07
AU22A044	LM53	K feldspar		18.3514	0.0414884	15.9289	0.0505298	38.9723	0.0989621			1569.65	28527.9	487912	454326	1.08555e+06	145.92	38.799	1.11639e+08	69093.1	7.6902e+08	4.00746e+07	29726.1	1.05657e+09	44013.1	97846.8	4.03334e+06	1.19387e+07
AU22A053	LM53	K feldspar		18.3604	0.0583418	15.9696	0.0564599	38.8914	0.167148			1190.57	29390.6	501404	466374	1.11544e+06	75.5706	68.6022	9.29487e+07	31936.7	6.97283e+08	3.54852e+07	29003.9	9.42126e+08	40125.1	114360	3.84632e+06	1.13354e+07
AU22A054	LM53	K feldspar		18.306	0.0587041	15.9399	0.0602163	38.9501	0.128351			1181.03	36929.5	631012	587059	1.40184e+06	39.5061	125.442	1.02337e+08	223259	7.15721e+08	3.68799e+07	30826.4	9.72648e+08	36431.3	101020	7.18213e+06	1.11986e+07
AU22A055	LM53	K feldspar		18.365	0.040241	15.9819	0.0507252	38.9501	0.102983			1559.63	31898.7	545914	506573	1.21349e+06	86.4354	83.2525	1.13879e+08	29663.9	7.61062e+08	3.93293e+07	26872.3	1.02508e+09	37445.4	151333	4.70313e+06	1.18597e+07
AU22A056	LM53	K feldspar		18.3802	0.0390444	16.0141	0.0583743	39.1395	0.129739			1551.98	31049.9	532330	495238	1.18579e+06	244.676	165.447	1.20615e+08	58648.2	7.95891e+08	4.10804e+07	24213.5	1.07438e+09	47173.6	301073	8.33525e+06	1.24144e+07
AU22A057	LM53	K feldspar		18.3799	0.0342218	16.0494	0.0325793	39.1582	0.107846			1663.46	45455.6	777995	725615	1.73098e+06	902.957	347.442	1.24423e+08	81962.2	8.30516e+08	4.49085e+07	34487.6	1.20494e+09	35205.2	113890	4.26378e+06	1.37663e+07
Rayner	Macey Island	Mawson Charnokite
AU10A018	LM01	K feldspar		17.9865	0.0610022	15.8516	0.0548956	38.3127	0.118812			1800.42	16473.3	301644	266251	651055	4543.56	531.007	7.50508e+07	2.87528e+06	5.85794e+08	3.0502e+07	34062.9	8.60799e+08	21104.6	39426.6	1.58076e+07	9.13857e+06
AU10A019	LM01	K feldspar		17.8724	0.0638374	15.8171	0.0513386	38.0053	0.117419			1641.57	16679.7	303471	269000	653910	2772.15	1019.38	8.42442e+07	55195.6	6.52316e+08	3.42354e+07	63281.4	9.68036e+08	46004.3	46572.1	2.3943e+06	9.36234e+06
AU10A020	LM01	K feldspar		17.9806	0.0503286	15.8999	0.0436605	38.3843	0.108056			1742.19	19168.6	350846	310756	758962	101.625	117.6	7.94263e+07	1.86668e+06	5.99632e+08	3.12089e+07	22840.6	8.78114e+08	22047.9	35436.8	1.06097e+07	1.03421e+07
AU10A021	LM01	K feldspar		17.9104	0.0413998	15.7592	0.044587	38.1257	0.0755193			1547.08	20341.7	370842	326852	799964	4987.02	248.115	8.03346e+07	2.37969e+06	6.69837e+08	3.60926e+07	36089.1	1.04065e+09	23637.8	68992	1.40806e+07	1.06781e+07
AU10A022	LM01	K feldspar		17.8975	0.0348616	15.8031	0.0280039	38.1759	0.0798205			1428.82	21049.8	383456	339171	828882	45.447	134.064	9.44832e+07	3.11315e+06	6.82546e+08	3.70568e+07	41187.1	1.02158e+09	56262.6	37600.8	1.62433e+07	1.12714e+07
AU10A023	LM01	K feldspar		17.9047	0.066279	15.777	0.0537185	38.1376	0.124361			1591.31	20241.9	368866	325612	796251	1126.09	302.852	9.67392e+07	5.44594e+06	6.83438e+08	3.76245e+07	29179.3	1.06251e+09	23175.4	37199.7	2.49345e+07	1.05954e+07
AU10A024	LM01	K feldspar		17.9113	0.0510495	15.8147	0.0487939	38.1956	0.12246			1427.96	19117.3	348483	308254	753140	1256.42	171.717	7.58602e+07	2.76367e+06	6.24917e+08	3.31134e+07	29305.4	9.54034e+08	23831.3	31340.6	1.60825e+07	9.72124e+06
AU10A025	LM01	K feldspar		17.9368	0.0427771	15.7998	0.0336024	38.1708	0.073126			1325.99	19467.6	355352	313603	766424	43.2759	72.4773	8.31811e+07	340475	6.03065e+08	3.20282e+07	29224.5	9.13714e+08	21719.5	34265.9	2.98566e+06	9.41645e+06
AU10A026	LM01	K feldspar		17.8971	0.0491515	15.773	0.06436	38.0657	0.11772			1096.23	17448.8	317781	280605	685039	76.5732	211.805	7.5201e+07	2.95583e+06	6.02701e+08	4.12556e+07	51032.3	9.51114e+08	26524.2	37226.7	1.37211e+07	9.28829e+06
AU10A027	LM01	K feldspar		17.858	0.0726644	15.7563	0.0565484	38.0321	0.150612			1134.83	22418	407370	360136	879338	7.62626	114.9	9.24126e+07	1.19465e+06	7.13845e+08	3.92445e+07	39495.8	1.12087e+09	23398.7	39074.5	8.34469e+06	1.14452e+07
Rayner	Austskjera	Mawson Charnokite
AU10A169	LM11	K feldspar		17.9654	0.0620646	15.7873	0.0548618	38.8449	0.138781			721.724	14474.4	263857	233300	580090	9.28624	389.962	1.20661e+08	2.07752e+06	5.49292e+08	2.86959e+07	48974.4	7.60506e+08	51898.8	70060.2	1.1756e+07	6.60928e+06
AU10A170	LM11	K feldspar		17.9894	0.0378043	15.844	0.0424629	38.8833	0.0772314			687.119	18400.4	335877	297652	738180	76.0338	403.991	1.9248e+08	2.11004e+06	6.52771e+08	3.59947e+07	46699.4	9.0716e+08	83826.6	70674.6	1.3309e+07	7.55682e+06
AU10A171	LM11	K feldspar		18.0643	0.0383409	15.901	0.0327759	38.883	0.0926666			610.833	20973	384436	340496	841402	6.02678	228.351	1.81524e+08	656864	6.6536e+08	3.74809e+07	65221.9	1.00495e+09	48321.6	90829.7	7.2732e+06	8.3917e+06
AU10A172	LM11	K feldspar		18.0628	0.0728174	15.9057	0.0830294	38.95	0.161731			677.899	15657.9	286991	254288	629270	13.319	289.403	1.35209e+08	492665	5.69472e+08	3.01269e+07	53447.1	7.88552e+08	53161.9	70345.1	5.29512e+06	7.15033e+06
AU10A173	LM11	K feldspar		18.0621	0.0501155	15.8972	0.0472327	38.8693	0.101839			566.618	16000	293253	259712	641703	26.8529	230.43	1.45674e+08	2.57228e+06	6.08627e+08	3.23787e+07	58391.7	8.49666e+08	62115.9	118846	1.50417e+07	7.56143e+06
AU10A174	LM11	K feldspar		18.0444	0.0396169	15.8726	0.0354449	38.8658	0.111553			619.227	15856.2	290338	256986	635896	22.8351	315.699	1.34458e+08	3.35656e+06	5.80913e+08	3.10298e+07	48700.3	8.26476e+08	54490.6	63802.7	2.43575e+07	7.19358e+06
AU10A175	LM11	K feldspar		18.1085	0.0423868	15.9528	0.0506644	39.0663	0.130646			625.759	15812.3	290567	257576	637425	2.23214	332.399	1.38294e+08	173118	5.73951e+08	2.98863e+07	37247.3	7.75963e+08	52993.5	90664.5	3.97068e+06	7.25726e+06
AU10A176	LM11	K feldspar		18.0388	0.0543346	15.8917	0.0426271	38.8324	0.0970965			659.973	14811	271123	240347	593504	1.22236	101.218	1.13272e+08	365738	5.4326e+08	2.86413e+07	4936.01	7.61452e+08	39172.1	65024.1	4.64819e+06	7.00103e+06
AU10A177	LM11	K feldspar		18.0567	0.0538381	15.9309	0.044602	38.9563	0.110189			709.791	13176.9	241453	214362	529721	70.3389	475.799	1.18673e+08	270926	5.20334e+08	2.65362e+07	37775.4	6.89678e+08	46653.3	62629.6	3.50575e+06	6.76111e+06
AU10A178	LM11	K feldspar		18.0042	0.0526016	15.8763	0.0428891	38.8756	0.100452			594.332	14449.1	263999	234260	579679	0.626613	214.065	1.20583e+08	1.40004e+06	5.46558e+08	2.8281e+07	41078.7	7.42819e+08	49910.1	63734.1	8.43985e+06	6.94411e+06

## Sheet: DR Table 2B Prydz Detrital
DR Table 2B. Feldspar Pb-isotope compositions from Prydz Bay detrital grains
See Appendix DR1 for a detailed description of the Pb isotope analytical method and Table DR1 for sample descriptions and references.
Name	Filename	Mineral		206/204	+/-1s	207/204	+/-1s	208/204	+/-1s		CPS->	Hg202	Pb204	Pb206	Pb207	Pb208	Th232	U238	Na23	Mg24	Al27	Si29	P31	K39	Ca43	Ti47	Fe56	Ba137
											background gas corrected
FE15B0269	C19-1-01-01	plagioclase		16.9948	0.124	15.5196	0.109	37.5276	0.268			2564	6562	113710	104127	254489	21	5	611920755	83525	793317695	31776563	1937.63	1.86572e+07	404376	6251.09	5.27362e+06	70027.8
FE15B0270	C19-1-01-02	plagioclase		17.2219	0.144	15.6809	0.124	37.8746	0.353			2258	6033	105938	96726	236127	169	1785	632193038	177185	820206875	32858315	859.214	1.84643e+07	417218	4678.83	5.39621e+06	87294.2
FE15B0271	C19-1-01-03	plagioclase		18.4041	0.133	15.7331	0.1	38.1904	0.272			2125	6579	123462	105836	259654	9275	29110	681971910	665791	872412448	35201265	1200.48	2.12158e+07	446420	5985.94	1.02779e+07	108124
FE15B0272	C19-1-02-01	K feldspar		18.2531	0.032	15.7316	0.027	37.9542	0.08			1666	39798	740706	640153	1560930	3	1160	128588970	128843	864442058	45967175	57205.3	1.2054e+09	19157.2	38322.6	3.69131e+06	2.98225e+06
FE15B0273	C19-1-02-02	K feldspar		18.2892	0.025	15.8036	0.028	38.0679	0.064			1612	35108	654713	567302	1381088	1	3	168563500	113244	857584263	45375210	56756.1	1.1361e+09	20294.4	37501.4	2.94903e+06	3.09733e+06
FE15B0274	C19-1-02-03	K feldspar		18.2766	0.036	15.7384	0.03	38.0348	0.074			1622	37441	697720	602489	1471521	1	2	134644732	110891	858045636	45691346	56036.5	1.18431e+09	18048.6	37347.2	2.31391e+06	3.40953e+06
FE15B0275	C19-1-03-01	plagioclase		17.9848	0.129	15.8034	0.11	37.852	0.262			2795	10473	192057	169230	409640	17	584	482945852	4841235	856849878	29520318	233589	4.30999e+07	573105	50292.8	1.98195e+07	366377
FE15B0276	C19-1-03-02	plagioclase		17.9486	0.083	15.7765	0.057	37.6792	0.154			2461	10550	193067	170173	410735	25	55	449246521	88270	845383337	27797027	245235	1.84325e+07	665886	81948.1	628413	129238
FE15B0277	C19-1-03-03	plagioclase		17.9727	0.055	15.8026	0.066	37.6907	0.129			2346	10770	197366	174017	419439	4	10	450175845	362541	854792351	28206481	220425	2.78648e+07	657672	50289.4	1.45536e+06	309471
FE15B0278	C19-1-04-01	K feldspar		18.101	0.042	15.7342	0.034	38.9646	0.088			1879	18900	348804	304038	760884	437	32	147614849	879329	1040329395	57898865	180314	1.55892e+09	17509.7	54643.4	5.69773e+06	3.60886e+06
FE15B0283	C19-1-04-02	K feldspar		18.2292	0.063	15.8363	0.059	39.5188	0.148			1666	8539	158704	138254	348622	2436	546	251047361	666194	978468194	52958406	167092	1.26619e+09	19287.5	121340	4.26752e+06	3.01727e+06
FE15B0284	C19-1-04-03	K feldspar		17.9588	0.074	15.6514	0.092	38.9038	0.222			1667	2756	50465	44103	110771	6258	708	508422353	843791	939537001	49924438	232067	8.48296e+08	30043.4	114769	6.17759e+06	1.88796e+06
FE15B0285	C19-1-05-01	K feldspar		17.5076	0.062	15.6558	0.052	37.381	0.133			1585	24412	435718	390714	942637	3	3	121116341	170284	793919246	39176763	246291	9.85897e+08	30145.3	15264	2.4803e+06	2.23805e+07
FE15B0286	C19-1-05-02	K feldspar		17.4204	0.031	15.5726	0.022	37.2205	0.079			1533	27208	483203	433148	1046067	6	162	117621479	162308	821067453	41237211	262623	1.06139e+09	31920.2	15740.1	1.83603e+06	2.30115e+07
FE15B0287	C19-1-05-03	K feldspar		17.4579	0.058	15.5907	0.053	37.226	0.123			1569	26006	462848	414493	999976	1	43	106522531	131374	781752378	38888196	236852	9.98097e+08	30619.2	14772	1.51205e+06	2.19108e+07
FE15B0288	C19-1-06-01	K feldspar		17.5442	0.086	15.5446	0.074	37.384	0.188			1407	12672	226638	201365	489301	4	8	176222513	43831	792471234	41361821	419.74	9.98595e+08	16869.2	12956.8	3.12516e+06	7.11557e+06
FE15B0289	C19-1-06-02	K feldspar		17.5271	0.017	15.5204	0.031	37.3601	0.072			1382	21171	378287	335908	816963	1	5	90383701	29515	763289482	39480146	695.954	1.05041e+09	9333.38	16183.8	5.94876e+06	6.86451e+06
FE15B0290	C19-1-06-03	K feldspar		17.6739	0.036	15.6431	0.028	37.6576	0.063			1279	17639	317806	282072	686051	5	236	127985998	45291	846083675	44823844	165.155	1.1676e+09	19382.7	14086.4	9.22966e+06	9.20052e+06
FE15B0294	C19-1-08-01	plagioclase		18.1698	0.068	15.8092	0.058	39.637	0.179			1477	11364	210496	183658	465197	2141	730	754859211	394537	791332743	35590221	90187.2	2.57507e+07	216012	77880.8	6.1104e+06	174635
FE15B0295	C19-1-08-02	plagioclase		18.1437	0.079	15.7482	0.072	39.5477	0.189			1494	11164	206491	179726	455965	562	666	728385518	31631	787182044	35578715	97243.1	6.68035e+07	206941	73807	2.96191e+06	255715
FE15B0296	C19-1-08-03	plagioclase		18.1662	0.031	15.846	0.052	39.6973	0.115			1331	10488	194221	169886	429950	341	607	698762909	131145	735888943	33232604	79378.8	2.64134e+07	207516	77340.1	3.17318e+06	181637
FE15B0205	C22-2-01	K feldspar		17.8042	0.051	15.6378	0.051	37.5226	0.127			4376	26638	484177	426403	1035213	17	76	315145022	177407	819018646	43674848	18155.8	8.58204e+08	19851.5	31826.3	4.42176e+06	4.26876e+06
FE15B0206	C22-2-02	K feldspar		18.3512	0.074	15.6452	0.044	37.7543	0.125			4043	27544	516009	441103	1076982	370	135	173315265	109544	824746487	43575889	82815.1	1.02776e+09	48670.7	84114.2	1.15175e+06	7.75787e+06
FE15B0208	C22-2-04	K feldspar		18.5267	0.044	15.8708	0.045	39.0851	0.089			3349	42297	799933	687103	1712007	5864	375	110640320	58498	839637621	46003410	73944	1.1875e+09	13244.5	15889.2	5.14093e+06	4.42003e+06
FE15B0209	C22-2-05	K feldspar		17.8964	0.054	15.825	0.046	38.3726	0.183			3185	75596	1381024	1224469	3003928	51	7	215127306	39045	824568793	43743402	211803	9.80982e+08	26051.5	52774.2	858014	413292
FE15B0211	C22-2-07	K feldspar		17.9961	0.077	15.8674	0.05	39.2042	0.121			3272	35461	651404	575901	1439542	11523	194	187190965	194881	849868799	44626954	101277	1.04732e+09	56000.5	95540.1	1.11354e+06	8.20987e+06
FE15B0212	C22-2-08	K feldspar		17.9434	0.067	15.7041	0.059	37.788	0.104			3075	24555	449731	394668	960763	984	967	60257849	480936	1007848472	60571849	0.1	1.6852e+09	19484.3	11965.7	2.17737e+07	6.8002e+06
FE15B0213	C22-2-09	K feldspar		18.3255	0.078	15.719	0.11	37.7071	0.178			2744	28169	526901	453181	1099781	24	51	139912619	44830	921590807	52010948	48427.3	1.36941e+09	16070.7	47141.5	2.32667e+06	4.09275e+06
FE15B0214	C22-2-10-alb	plagioclase		18.6937	0.115	15.7108	0.1	39.1456	0.205			3118	6989	133349	112373	283256	38	309	749107829	93635	784974693	35382869	852.639	2.46472e+07	179488	1355.09	1.98236e+06	20981.8
FE15B0215	C22-2-11	plagioclase		17.8846	0.071	15.8722	0.069	38.7713	0.133			3771	15909	290404	258425	638604	41	22	374304737	42664	845253254	30158968	49552.4	1.93491e+08	592979	48476.2	553227	2.04195e+06
FE15B0216	C22-2-12	K feldspar		17.5285	0.043	15.616	0.04	37.5573	0.112			2892	24949	446342	398717	970079	69	14	165888902	15729	776938995	41236414	9402.7	9.76217e+08	38108.5	9035.05	1.2193e+06	4.06199e+06
FE15B0217	C22-2-13	K feldspar		18.6472	0.036	15.8232	0.03	38.3253	0.065			3142	36953	703273	598383	1466161	5	7	138532490	48708	742215588	37736175	41653.2	9.15989e+08	23638	36014.6	937348	5.0287e+06
FE15B0220	C22-2-16-alb	plagioclase		19.7028	0.147	16.2809	0.117	41.3474	0.226			3657	2695	54187	44897	115340	362	216	506662194	183670	789941529	34277762	48902.3	3.30546e+07	504549	30318.7	1.12536e+06	296842
FE15B0221	C22-2-17	K feldspar		18.7764	0.055	15.6816	0.031	38.0956	0.104			2762	19640	376331	315156	774449	2	11	165631090	96865	833436509	44070905	12943.3	1.06977e+09	25996	65342.6	1.43225e+06	1.39167e+07
FE15B0222	C22-2-18	K feldspar		18.7622	0.075	15.9146	0.063	37.5174	0.125			2996	30873	591122	502766	1198891	219	116	474375198	220912	982073141	53575239	755417	9.46352e+08	106909	102374	896725	999410
FE15B0223	C22-2-19	K feldspar		18.2749	0.096	15.469	0.064	37.5191	0.181			2579	6523	121647	103248	253306	83	32	107507080	58714	758684363	38966875	18879.1	9.87845e+08	24349.5	24393.3	1.81941e+06	1.10496e+07
FE15B0224	C22-2-20	K feldspar		18.1797	0.038	15.7664	0.018	38.2716	0.096			2010	49656	921200	801084	1966915	6	11	197683063	207685	809845143	42663868	119762	9.88317e+08	24454.7	33424.2	2.42566e+06	9.32069e+06
FE15B0225	C22-2-21	K feldspar		18.2155	0.039	15.8507	0.038	38.3771	0.129			2534	26052	484258	422535	1034765	186	263	236899742	202270	902211294	48707317	34243.2	1.12278e+09	46211.2	127776	673607	6.97791e+06
FE15B0226	C22-2-22	K feldspar		18.4037	0.043	15.6378	0.035	38.4052	0.12			2535	28336	532142	453395	1126266	1	10	132575957	28920	871762713	48404879	6113.61	1.23827e+09	38772.8	29087.5	2.08629e+06	1.27539e+07
FE15B0227	C22-2-23	K feldspar		17.3623	0.047	15.5347	0.051	36.9442	0.106			2471	59528	1054619	946177	2275931	4	992	118066896	38479	811334888	43774686	5065.43	1.12225e+09	11369.7	4035.4	2.19964e+06	1.001e+06
FE15B0228	C22-2-24	K feldspar		18.5957	0.046	15.779	0.06	38.3048	0.154			1932	26395	500840	426134	1046299	126051	22850	110399594	8865112	816754437	45910248	94151.4	1.10606e+09	24722	430022	3.60871e+07	1.05755e+07
FE15B0229	C22-2-25	plagioclase		17.3758	0.062	15.6781	0.061	36.6085	0.145			3136	5823	103237	93404	220587	79	90	434725221	35463	832169082	27012345	12713.8	3.30686e+06	701266	3767.83	1.1343e+06	152933
FE15B0236	C22-2-27	K feldspar		17.8689	0.049	15.769	0.067	38.7522	0.136			1865	22040	401797	355548	883630	14	2	198260135	7100	812638940	43171720	9365.7	1.00513e+09	33671.1	123415	2.71793e+06	8.34121e+06
FE15B0237	C22-2-28	K feldspar		18.226	0.087	15.8118	0.063	37.9346	0.156			1609	24693	459149	399419	969071	87	1122	475622166	83861	845296521	44028673	697525	6.85246e+08	53493.1	73298.4	402274	688299
FE15B0238	C22-2-29-alb	plagioclase		17.9088	0.05	15.7471	0.048	37.2966	0.098			1651	16915	309046	272485	652647	0	19	682150693	20464	992739949	37687903	254532	1.59057e+07	568673	183260	228468	101862
FE15B0239	C22-2-30	K feldspar		17.7268	0.052	15.8188	0.04	37.7767	0.106			1386	51459	930596	832703	2010942	10	155	157909790	198427	935484521	47311060	141605	1.13094e+09	54482.5	90927.4	481671	9.51187e+06
FE15B0240	C22-2-31	K feldspar		17.9167	0.05	15.833	0.037	38.9287	0.086			1390	60081	1098148	973095	2419421	34054	803	195876573	94240	1021086398	57459289	14456.1	1.41214e+09	16959.2	128585	2.7255e+06	3.53274e+06
SE12A008	C37-3-001	K feldspar		18.54	0.1	15.69	0.06	38.11	0.17			3382	53038	1008037	868518	2107881	264	342	107888172	176229	890544137	48611460	72892.1	1.44558e+09	17268.7	23706.9	2.63933e+06	9.21041e+06
SE12A010	C37-3-003	K feldspar		17.86	0.05	15.75	0.05	38.38	0.1			3373	56558	1035411	929771	2263609	165	155	148967977	950765	961134918	52515532	9074.96	1.44836e+09	50898.7	182165	2.14574e+07	3.27411e+07
SE12A011	C37-3-004	K feldspar		17.55	0.04	15.69	0.04	37.94	0.06			3328	69041	1242276	1130181	2730901	20422	2547	95613940	8160935	960911272	52254252	421217	1.52503e+09	18970.2	134167	4.33591e+07	4.22043e+06
SE12A012	C37-3-005	K feldspar		17.73	0.04	15.68	0.05	38.33	0.12			3391	25145	456969	411260	1004677	303	141	89184711	15314	797676077	40938153	3835.6	1.19982e+09	12133.1	23926.3	1.63833e+06	2.09856e+07
SE12A013	C37-3-006	K feldspar		18.36	0.03	15.97	0.05	38.84	0.1			2988	59614	1121885	993049	2413431	75	232	203680685	42564	844699364	44171672	67964.8	1.14786e+09	35092.2	81816.2	673065	2.16496e+06
SE12A014	C37-3-007	plagioclase		16.82	0.04	15.29	0.04	36.5	0.09			3750	24525	422879	391080	933029	2	5	734261666	10703	804655879	34442387	43053.6	2.09642e+07	307092	5871.84	2.00165e+06	21421.2
SE12A015	C37-3-008	K feldspar		18.01	0.04	15.81	0.04	38.71	0.11			3210	38994	719763	643138	1573333	577	137	134221402	18881	920214736	49339489	5425.77	1.39163e+09	25381	117047	2.87671e+06	1.96478e+07
SE12A016	C37-3-009	K feldspar		17.72	0.05	15.65	0.04	41.1	0.15			3188	101268	1839104	1652773	4336905	664	44	99446628	64032	909182561	50294915	27990.9	1.52618e+09	20138.1	4489.99	1.17986e+06	1.05297e+06
SE12A017	C37-3-010	K feldspar		17.74	0.05	15.59	0.03	37.45	0.09			3365	39041	709681	634556	1523565	404	0	114372981	55606	938457514	51383583	5866.33	1.53389e+09	26039.9	13126.2	7.01007e+06	1.64791e+07
SE12A018	C37-3-011	K feldspar		18.27	0.07	15.93	0.07	38.83	0.06			3349	43805	820111	727577	1772032	88	75	191318004	205004	894627073	48067928	24196.2	1.3054e+09	65837.5	110276	3.30583e+06	1.01837e+07
SE12A019	C37-3-012	K feldspar		17.89	0.11	15.68	0.07	38.45	0.18			2972	68032	1247336	1112135	2725549	344	787	97467069	1324724	1037041561	61075720	1461.87	1.89163e+09	19462.3	72251.9	2.14812e+07	8.33261e+06
SE12A020	C37-3-013	K feldspar		18.45	0.06	15.77	0.05	38.16	0.11			3108	32595	616325	535619	1295722	202	82	88812282	10156632	826497418	41750443	55051.8	1.23268e+09	28564.2	55284.4	5.36457e+07	1.30184e+07
SE12A021	C37-3-014	K feldspar		17.85	0.06	15.74	0.04	38.8	0.12			3086	27120	496187	444796	1096134	200	188	146497573	304173	914429001	48374570	10883.4	1.34665e+09	26438.5	145871	8.61556e+06	1.71326e+07
SE12A022	C37-3-015	K feldspar		18.18	0.06	16	0.03	43.13	0.51			3104	98322	1831942	1639401	4416657	581	91	393535728	122723	826551094	43553971	80213.1	9.14128e+08	16737	23279.4	1.32232e+06	9.75347e+06
SE12A024	C37-3-017	K feldspar		18.75	0.13	15.77	0.09	38.75	0.29			3119	10244	196818	168323	413401	817	150	94259923	83912	790870487	41047828	1397.01	1.25173e+09	14371.3	3542.72	1.13157e+06	7.81762e+06
SE12A025	C37-3-018	K feldspar		17.85	0.05	15.76	0.05	38.73	0.11			2869	24440	446957	401068	985752	15	17	161434092	26695	888516449	46687919	10847.5	1.2635e+09	44044.1	121794	2.08302e+06	1.86143e+07
SE12A026	C37-3-019	K feldspar		18.62	0.1	15.72	0.07	38.83	0.18			2660	46106	879600	754828	1864106	2512	329	246134306	509584	1085999663	66261313	40705.9	1.84359e+09	26201.1	87592.5	1.09447e+07	6.63586e+06
SE12A027	C37-3-020	K feldspar		17.98	0.06	15.81	0.05	38.54	0.14			2622	74103	1364722	1220166	2973295	1898	2409	318780444	480024	1042373021	58595324	24318	1.48942e+09	57880.8	185863	8.75933e+06	2.16892e+07
SE12A028	C37-3-021	K feldspar		18.43	0.06	15.83	0.04	38.42	0.09			2504	32023	604633	527926	1280850	3456	3636	219664438	2426766	1002588100	54546733	45303.7	1.43861e+09	21489.1	19519.3	1.29311e+07	2.82015e+07
SE12A029	C37-3-022	K feldspar		18.29	0.07	15.97	0.07	40.03	0.43			2645	85784	1607549	1425978	3575052	5492	903	331240801	5296446	1080926809	62371614	696922	1.65526e+09	31578.1	148861	4.54137e+07	5.94801e+06
SE12A030	C37-3-023P	plagioclase		19.25	0.08	16.13	0.06	38.88	0.14			3362	9639	190048	161834	390139	160	168	515591934	258526	899302560	31014062	14380	3.4005e+07	736014	102979	5.34028e+06	67933.7
SE12A031	C37-3-024	K feldspar		18.19	0.03	15.79	0.05	38.57	0.06			2594	64637	1204245	1062137	2594686	1084	1005	104948349	151385	874624384	46692469	7802.06	1.3788e+09	17610.2	29616.6	3.4843e+06	1.62709e+07
SE12A033	C37-3-026	K feldspar		18.58	0.04	15.87	0.04	38.58	0.08			2482	45056	857693	744047	1809083	1827	303	158558792	53517	928194497	50459752	29295	1.46726e+09	15681.2	43675.3	1.97247e+06	6.23077e+06
SE12A034	C37-3-027	K feldspar		17.95	0.06	15.63	0.05	38.01	0.07			2600	70320	1292628	1143466	2781657	37	2177	86973018	59348	936558393	53471130	39493.3	1.6735e+09	6780.13	2694.02	1.20695e+06	1.66772e+06
SE12A036	C37-3-029	K feldspar		18.17	0.07	15.69	0.04	38.43	0.12			2671	50043	931047	816995	2001180	552	145	147267606	176567	1007867441	56598362	1491.62	1.68867e+09	12531.3	22199.7	4.66476e+06	1.09535e+07
SE12A037	C37-3-030	K feldspar		17.93	0.06	15.77	0.04	37.94	0.1			2706	40519	744217	664714	1599445	530	43	164099131	85499	920533125	47796043	13316.2	1.32278e+09	72152.9	95929.6	3.93047e+06	9.70981e+06
SE12A038	C37-3-031	K feldspar		18.11	0.03	15.82	0.04	38.51	0.09			2420	68523	1270585	1127636	2744901	1245	518	264948568	171082	876609586	45715293	475472	1.1591e+09	27487.2	90779.5	783010	1.44202e+06
SE12A039	C37-3-032	K feldspar		18.23	0.04	15.87	0.04	37.62	0.06			2810	55815	1041926	921109	2184142	22	42	264923910	99040	858570554	43250411	426320	1.05153e+09	65098.4	158798	387426	1.69181e+06
SE12A040	C37-3-033	K feldspar		17.61	0.05	15.68	0.07	38.18	0.16			2577	47806	862240	779347	1898420	288	2736	320220402	255400	1036791935	59251114	115827	1.48466e+09	68093.6	120930	1.48931e+07	1.6758e+07
SE12A048	C37-3-034	K feldspar		17.88	0.15	15.79	0.11	39.06	0.2			2818	69944	1280161	1147525	2840375	505	491	147134659	529378	966862477	55653717	13393.9	1.65935e+09	22394.2	156033	1.53739e+07	1.19014e+07
SE12A050	C37-3-036	K feldspar		18.92	0.06	15.98	0.07	39.33	0.13			2491	26569	514699	441186	1086397	39	109	122435146	21161	792418288	40924578	201.783	1.17444e+09	21760.5	8299.39	1.03981e+06	2.97305e+06
SE12A051	C37-3-037	K feldspar		17.83	0.07	15.71	0.04	38.71	0.16			2145	77379	1412670	1263272	3113737	7075	4731	85709251	842758	1024975904	57439715	831657	1.81372e+09	18681.4	138454	6.71269e+06	3.85172e+06
SE12A052	C37-3-038	K feldspar		17.76	0.04	15.8	0.05	38.56	0.08			2009	79139	1438670	1298958	3172501	993	51	112990926	149127	967308174	52770206	232101	1.596e+09	19293.7	100416	1.21517e+06	1.1426e+07
SE12A053	C37-3-039	K feldspar		18.73	0.07	15.86	0.06	38.9	0.15			2214	22574	432840	371945	912762	4	12	254382431	10769	787809670	40125850	4269.28	9.48052e+08	46310.4	50000.6	3.35226e+06	5.06701e+06
SE12A054	C37-3-040	K feldspar		17.93	0.05	15.79	0.04	37.44	0.1			2100	46901	860830	769192	1825329	77	22	382605657	64691	834303050	41256396	503439	8.21678e+08	73736.3	27151.4	461983	56396.9
SE12A055	C37-3-041	K feldspar		17.65	0.05	15.83	0.06	36.51	0.08			2067	64624	1167741	1062357	2452235	108	372	86359510	14554	880764476	50235680	6841.03	1.54214e+09	6179.22	3008.4	1.43714e+06	4.51843e+06
SE12A056	C39-4-001	K feldspar		18.04	0.05	15.85	0.07	38.69	0.12			2806	66756	1233046	1098699	2684389	1732	678	168202623	2186737	1016890839	56590195	9904.09	1.60703e+09	47604.9	104018	1.74288e+07	1.34227e+07
SE12A057	C39-4-002	K feldspar		18.49	0.04	15.81	0.04	38.56	0.08			3088	56313	1065665	924813	2256966	0	38	112447574	99229	734176544	36525309	98102.1	1.04468e+09	22527.6	16489.8	1.0324e+06	1.18447e+07
SE12A058	C39-4-003	K feldspar		18.31	0.05	15.8	0.05	38.33	0.1			3314	18120	339686	297358	721846	14	77	52614059	167980	971414917	53728850	1634.88	1.71687e+09	45038.5	8307.62	4.64705e+06	2.58543e+06
SE12A060	C39-4-005	K feldspar		17.67	0.06	15.8	0.06	37.68	0.15			4652	58457	1057491	959341	2289056	348	128	359554269	146733	881965857	45210740	280415	9.82516e+08	91772.6	74832	737789	4.83394e+06
SE12A061	C39-4-006	K feldspar		18.2	0.03	15.86	0.02	38.66	0.05			3462	65317	1216613	1075372	2623748	333	6273	180093706	78538	860382191	44869516	37690.4	1.23556e+09	46132.9	30583.1	4.35318e+06	8.62151e+06
SE12A062	C39-4-007	K feldspar		17.98	0.06	15.96	0.02					2850	158281	2912986	2622304	6983894	270	1248	205248953	22584	992533920	57648063	15433.6	1.67484e+09	28634.1	124067	2.921e+06	9.09816e+06
SE12A063	C39-4-008	K feldspar		17.78	0.09	15.86	0.06	37.59	0.15			3149	38845	706888	639843	1517204	729	538	517730064	444207	874141046	45854178	233791	6.33993e+08	185501	64572.4	1.29967e+06	3.14306e+06
SE12A064	C39-4-009	K feldspar		17.86	0.08	15.84	0.08	39.06	0.24			2523	83607	1528132	1375170	3392966	3305	651	135159657	312382	1016154841	58200070	244331	1.75651e+09	34032.8	88969.2	8.40688e+06	1.24517e+07
SE12A065	C39-4-010	K feldspar		18.01	0.06	15.93	0.06	41.57	0.1			2273	154901	2855285	2561778	6690362	340	113	217774109	195334	852500332	45518192	199167	1.23388e+09	43725.1	59822.3	4.0617e+06	4.42775e+06
FE15B0197	C39-4-01-02	plagioclase		17.8648	0.039	15.7314	0.05	37.7601	0.078			4864	16581	302461	267054	648646	64	519	621275822	3057836	790989230	32311314	111505	6.36778e+07	242847	5489.42	8.3611e+06	95185.4
SE12A066	C39-4-011	K feldspar		17.59	0.04	15.63	0.03	37.74				2180	38115	686057	618653	1494267	267	53	116350139	106132	891997127	46562009	14847.8	1.35711e+09	26139.8	54303.5	4.78025e+06	3.10572e+07
SE12A067	C39-4-012	K feldspar		18.31	0.05	15.72	0.04	38.26	0.09			2317	49187	921812	802446	1955258	2	55	104110871	23414	805312659	41514834	3417.63	1.22048e+09	12548.6	21244.2	3.29996e+06	4.34151e+06
SE12A068	C39-4-013	K feldspar		17.71	0.04	15.83	0.07	38.01	0.19			2130	80217	1453913	1318090	3167417	417	174	111547711	877991	895968925	48239790	151611	1.44748e+09	13124.2	30968.8	4.41952e+06	1.1772e+07
SE12A069	C39-4-014	K feldspar		18.37	0.09	15.88	0.07	38.74	0.14			2100	47117	885650	776799	1896126	208	883	124255861	44644	890818172	48824860	290339	1.47992e+09	4400.61	3547.59	1.25955e+06	548926
SE12A070	C39-4-015	K feldspar		17.12	0.11	15.49	0.03	38.14	0.3			2663	81860	1433624	1316217	3242988	2333	642	80678266	662381	876414776	49872189	217725	1.56032e+09	9087.58	12832.9	3.56642e+06	3.50811e+06
SE12A071	C39-4-016	K feldspar		17.86	0.03	15.89	0.03	37.41	0.08			2935	76389	1396265	1260152	2968826	1691	8465	118128449	62676	807090791	42316135	264897	1.2446e+09	36988.9	5611.34	629446	9.451e+06
SE12A072	C39-4-017	K feldspar		17.84	0.05	15.93	0.06	39.1	0.16			2792	69213	1263643	1144359	2810789	26	59	142428790	30534	882371235	49066127	15532.8	1.45442e+09	12576	20194	998574	3.79801e+06
SE12A073	C39-4-018	K feldspar		18.95	0.04	16.01	0.04	38.33	0.09			2278	49281	955541	818815	1962317	40	32	441026602	37144	910318248	48253198	19623.5	9.5091e+08	101254	161132	3.03757e+06	1.64076e+06
SE12A075	C39-4-020	K feldspar		18.17	0.05	15.77	0.05	37.96	0.1			2561	32948	612680	539140	1298997	7391	28433	89734086	169257	863208081	46084995	546001	1.3908e+09	48470.5	34774.6	1.54739e+06	8.30624e+06
FE15B0198	C39-4-02-01	plagioclase		18.4621	0.079	15.7755	0.067	38.0019	0.143			4955	7615	143558	122995	299811	4	29	466529730	250379	771103670	27657468	4758.94	2.42811e+07	534371	13198	5.06822e+06	234547
FE15B0199	C39-4-02-02	plagioclase		18.2616	0.092	15.635	0.078	37.6371	0.155			4394	7726	144052	123663	301222	3	5	490646914	96217	810598838	29008887	3450.6	1.8581e+07	580472	14693.5	5.19832e+06	238355
SE12A076	C39-4-021	K feldspar		17.23	0.03	15.53	0.07	37.35	0.07			3255	56613	997826	912701	2196369	5578	2833	80009864	103967	939168234	52093312	46684.8	1.64117e+09	16807.6	24893.8	2.59391e+06	5.50553e+06
SE12A077	C39-4-022	K feldspar		18.69	0.02	15.91	0.04	38.62	0.08			2654	42151	805878	695963	1690660	2161	770	243114494	1751039	863121739	44335094	248622	1.1324e+09	48594.8	140530	1.56868e+07	3.71395e+06
SE12A078	C39-4-023	K feldspar		18.25	0.06	15.89	0.05	38.74	0.13			3343	31428	586796	518109	1264390	7805	364	205962277	32782	846614845	43011367	9958.44	1.10473e+09	71167.8	170325	5.85208e+06	1.82756e+07
SE12A079	C39-4-024	K feldspar		17.83	0.03	15.88	0.03	38.11	0.09			2505	70783	1291339	1166553	2801522	869	275	302853602	178824	870074248	45372409	287296	1.03751e+09	52897.3	83773.5	1.12787e+06	6.41894e+06
SE12A080	C39-4-025	K feldspar		18.26	0.04	15.91	0.05					2984	79632	1487438	1314768	3353447	208831	7577	68674748	283403	804277195	43074129	15922.5	1.34427e+09	3367.62	1315.38	2.5807e+06	74314.6
SE12A081	C39-4-026	K feldspar		18.63	0.08	15.88	0.07	38.82	0.12			2930	73336	1397328	1208195	2956644	603	1526	146073849	107105	976422271	54830931	35860.9	1.66717e+09	33631.1	37684.3	5.64706e+06	9.66341e+06
SE12A089	C39-4-027	plagioclase		18.43	0.1	15.95	0.12	38.88	0.28			3862	5320	100278	88035	214811	333	383	686658059	991215	848872726	37388930	2518.58	9.92233e+06	463807	3252.18	4.92211e+06	42788.2
SE12A090	C39-4-028	K feldspar		18.31	0.12	15.95	0.08	37.82	0.09			2682	31208	584422	516388	1225698	79	309	452420312	103810	940495405	50614474	369911	1.06259e+09	72677.3	99703.1	423521	2.56625e+06
SE12A091	C39-4-029	K feldspar		17.78	0.08	15.71	0.05	38.52	0.16			2773	64041	1164936	1043695	2562023	27374	738	147395096	348994	1043051883	61774557	38586	1.81033e+09	24505.7	179958	1.56123e+07	2.25708e+07
FE15B0200	C39-4-03	K feldspar		17.9877	0.046	15.7766	0.052	38.275	0.13			3072	37228	683715	601279	1476044	15	42	220409495	17224	898844423	47631237	4870.64	1.06392e+09	58419.5	105102	4.33001e+06	9.54865e+06
SE12A092	C39-4-030	K feldspar		17.96	0.06	15.8	0.04	38.29	0.11			3031	29558	542898	484493	1175448	6567	314	134070062	79750	762940190	39479240	3050.13	1.1206e+09	28345.7	43405.1	5.12607e+06	1.17296e+07
SE12A093	C39-4-031	K feldspar		17.9	0.06	15.86	0.06	41.65	0.11			2792	109711	2008493	1805341	4745977	2341	82	154058836	153856	919718670	49865200	286236	1.47652e+09	20411.9	58341	777068	1.1989e+07
SE12A094	C39-4-032	K feldspar		18.03	0.06	15.85	0.06	38.07	0.12			3099	29645	546624	487549	1171968	820	519	170934266	1169837	847735335	43794380	100827	1.18626e+09	45844.8	124085	1.0399e+07	1.01762e+07
SE12A095	C39-4-033	K feldspar		17.82	0.04	15.87	0.05	37.9	0.1			2973	60509	1103110	996186	2381466	8	16	119365544	43765	799500572	41091045	14619.6	1.20145e+09	20776.7	49167.2	1.70297e+06	1.93746e+07
SE12A096	C39-4-034	K feldspar		18.53	0.03	15.83	0.05	38.21	0.08			2699	53613	1015830	880743	2127430	529	316	145801480	30036	761128132	39216216	34546.1	1.09476e+09	23415.1	21987.2	1.22736e+06	1.60525e+06
SE12A097	C39-4-035	K feldspar		18.18	0.05	15.87	0.06	38.32	0.12			2390	74672	1388143	1229769	2971464	110	22	285990330	90579	936341177	49668983	383983	1.2561e+09	62709.4	207920	365402	4.30063e+06
SE12A098	C39-4-036	K feldspar		16.5	0.06	15.3	0.07	37	0.16			2370	17857	301335	283502	686223	13832	7075	67395948	207646	774246833	39717354	2524.35	1.22097e+09	22210.7	35636.2	5.9974e+06	1.20776e+07
SE12A099	C39-4-037	K feldspar		18.58	0.05	15.9	0.04	38.6	0.07			2141	51697	982577	852847	2072559	467	166	308941281	471003	856512711	44115496	310081	9.4952e+08	107100	114056	1.15661e+06	6.51365e+06
SE12A100	C39-4-038	K feldspar		16.71	0.04	15.32	0.03	37.18	0.1			2100	20057	342845	318824	774586	19	21	99666713	43186	730997142	36644981	2408.19	1.06103e+09	32858.8	49696.9	5.67084e+06	1.93277e+07
FE15B0201	C39-4-04	K feldspar		18.3986	0.044	15.6962	0.035	38.1669	0.117			3492	40514	761053	651009	1601756	66	19165	121608288	111155	823127516	44257501	159989	1.11825e+09	18624.6	18707.3	2.15155e+06	8.09979e+06
SE12A102	C39-4-040	K feldspar		19.11	0.07	16.01	0.05	39.43	0.11			1821	24911	486763	413917	1020203	36	44	19946717	357770	990260790	53781968	11585.2	1.74259e+09	10208.5	3490.48	1.93557e+06	5.72803e+06
SE12A103	C39-4-041	K feldspar		18.01	0.06	15.74	0.06	37.9	0.13			1656	56647	1043035	925501	2229813	157	255	253598447	755501	953823006	52182133	673050	1.38301e+09	80351.6	264210	2.355e+06	3.71227e+06
SE12A104	C39-4-042	K feldspar		18.59	0.05	16.08	0.04					1845	85639	1628115	1429255	3781853	3262	1418	120537940	786156	948821330	52799353	153182	1.55636e+09	22030.6	189617	1.89945e+07	9.7536e+06
SE12A105	C39-4-043	K feldspar		18.26	0.05	15.83	0.04					1578	105078	1962119	1726068	4570044	189793	239911	115862852	4075381	969643632	52011377	63991.2	1.54052e+09	15066.6	39580.3	7.19767e+07	8.29159e+06
SE12A106	C39-4-044	K feldspar		18.39	0.04	15.78	0.05	38.35	0.09			1725	21762	409144	356313	866800	1851	463	74179580	3663939	1011376343	54421397	330177	1.69722e+09	34324.1	81607.1	1.32219e+07	1.70174e+07
SE12A107	C39-4-045	K feldspar		18.86	0.08	15.82	0.05	39.28	0.13			2001	19904	383877	326751	811999	8353	245	425769484	193092	875291319	44127608	9760.02	8.32463e+08	136303	67913.7	5.89587e+06	2.37727e+06
SE12A108	C39-4-046	K feldspar		18.48	0.04	15.85	0.04	38.36	0.07			1779	37922	716506	623851	1511061	1478	868	68346215	2427221	907597297	50614967	22980.1	1.5356e+09	9784.48	27989.7	7.756e+06	6.65103e+06
SE12A109	C39-4-047	K feldspar		18.34	0.04	15.89	0.03	39.05	0.06			2052	36330	681276	599262	1473539	24078	6970	160713359	753629	832813894	44019880	23303.6	1.21901e+09	12012.1	46826.4	1.30384e+07	2.18243e+06
SE12A110	C39-4-048	plagioclase		18.48	0.06	15.94	0.04	38.45	0.11			2749	10749	203083	177893	429273	402	1987	503898266	554756	865725410	31374928	12234.4	1.30946e+08	591922	77634.1	1.14496e+07	584385
SE12A111	C39-4-049	K feldspar		18.32	0.07	15.95	0.06	37.82	0.11			2421	52116	976176	862719	2047601	14151	643	497172199	1186006	938059639	49146760	927025	9.45352e+08	80783.8	65388.9	5.23481e+06	3.21771e+06
FE15B0202	C39-4-05	plagioclase		18.2924	0.112	15.7486	0.096	38.1384	0.25			4043	4068	75968	65580	160694	25	48	677916010	43632	792838052	39077866	601.887	2.42365e+08	147798	1984.94	2.83122e+06	524321
SE12A112	C39-4-050	K feldspar		19.12	0.19	16.16	0.09	39.02	0.29			2321	72357	1414634	1214119	2932590	14	83	256372194	373242	1109792015	64105720	229570	1.81715e+09	45425.4	182195	1.36865e+06	5.47717e+06
SE12A113	C39-4-051	K feldspar		18.17	0.09	15.84	0.04	38.65	0.13			1902	58421	1085391	960553	2345666	296	221	208985594	148749	1069667694	59592283	10502.1	1.63442e+09	88688.8	151110	4.51328e+06	2.02816e+07
SE12A114	C39-4-052	K feldspar		17.94	0.02	15.71	0.04	38.19	0.08			2309	40528	743510	661193	1607720	57	15	90482232	20512	796452387	40719837	1484.03	1.22878e+09	11480	14822.3	1.64283e+06	1.06585e+07
SE12A115	C39-4-053	K feldspar		19.03	0.05	15.8	0.05	35.15	0.11			2056	35943	699487	589702	1312401	2	6	194752812	29892	858554141	46788675	11418.9	1.28596e+09	21018.6	16671.2	4.68198e+06	2.58564e+06
SE12A116	C39-4-054	K feldspar		18.22	0.03	15.9	0.03	38.81	0.07			1996	73432	1367940	1211969	2961018	111	18	153488283	135244	769595810	38498898	121342	1.06905e+09	27635.4	94729.7	845354	9.4546e+06
SE12A117	C39-4-055	K feldspar		17.66	0.07	15.56	0.07	37.79	0.15			1699	44382	801284	716842	1742689	18036	8744	79917393	370605	947260649	53196921	53914	1.65716e+09	27147.2	58669.7	2.15024e+06	1.22117e+07
FE15B0203	C39-4-06-alb	plagioclase		17.3362	0.126	15.4924	0.12	36.7804	0.277			5667	5172	91547	82030	197049	3	2	450393343	67195	781381530	27294740	4546.8	1.80632e+07	582757	4311.58	5.82187e+06	399062

## Sheet: DR Table 2C Mirny Detrital
DR Table 2C. Feldspar Pb-isotope compositions from Mirny region detrital grains
See Appendix DR1 for a detailed description of the Pb isotope analytical method and Table DR1 for sample descriptions and references.
Filename	Analysis Name	Mineral		206/204	+/-1s	207/204	+/-1s	208/204	+/-1s		CPS->	Hg202	Pb204	Pb206	Pb207	Pb208	Th232	U238	Na23	Mg24	Al27	Si29	P31	K39	Ca43	Ti47	Fe56	Ba137
											background gas corrected
SE12A119	KC18-1-002	K feldspar		17.9551	0.0491654	15.8618	0.0291287	38.4874	0.137178			2283.39	38339.1	703820	631480	1.53309e+06	9761.55	3529.06	4.61744e+08	54512.8	8.72672e+08	4.63566e+07	14496.2	9.13584e+08	46304.3	11198.2	2.65419e+06	2.18117e+06
SE12A120	KC18-1-003	K feldspar		18.0433	0.0318311	15.8321	0.0479192	38.5582	0.0941605			2562.38	62953.4	1.16135e+06	1.03501e+06	2.52207e+06	766.406	1726.68	1.40836e+08	83703.8	8.53543e+08	4.51824e+07	78623.9	1.33979e+09	7674.36	17805.3	5.51819e+06	3.03483e+06
SE12A122	KC18-1-005	K feldspar		16.4514	0.048872	15.4649	0.0418847	36.2867	0.0986656			2366.22	22742.2	382519	365274	857499	3977.8	821.197	3.26219e+08	37386.5	8.91349e+08	4.69505e+07	8534.57	1.10709e+09	39136.7	114924	1.52082e+07	2.24808e+07
SE12A123	KC18-1-006	K feldspar		17.9554	0.0549094	15.8432	0.0431053	38.6614	0.0904137			2364.66	42268.2	775934	695536	1.69809e+06	124.813	347.205	2.35188e+08	291385	9.25858e+08	4.831e+07	3832.79	1.24597e+09	52514.4	22763.7	6.02459e+06	7.97322e+06
SE12A124	KC18-1-007	plagioclase		16.831	0.0733942	15.4209	0.0568722	36.5325	0.121729			2390.63	13340.5	229558	213684	506450	20105	8146.07	6.48419e+08	223196	1.00157e+09	3.74704e+07	5082.03	1.11679e+08	667219	40429.4	9.89681e+06	463567
SE12A125	KC18-1-008	K feldspar		16.7607	0.124551	15.623	0.14224	37.5923	0.267058			1937.33	16136.3	276504	261870	630383	9540.69	2646.11	8.46041e+07	195778	9.74907e+08	5.27167e+07	15489.5	1.6653e+09	6250.6	17730.1	1.14483e+07	8.41947e+06
SE12A126	KC18-1-009	K feldspar		16.9007	0.0977806	15.6578	0.113654	37.0108	0.197887			2508.08	7724.15	133462	125640	297098	2626.6	4908.82	5.78501e+08	9.99278e+06	9.63622e+08	4.43706e+07	12697.3	5.45785e+08	171167	20710.4	4.52314e+07	6.8974e+06
FE15B0297	KC18-1-01	plagioclase		18.3692	0.168397	15.6282	0.147382	37.9478	0.317965			2466.27	5822.2	109021	93011.9	228153	7941.52	1935.51	7.45225e+08	1.22085e+07	9.41239e+08	4.38714e+07	9832.51	3.19872e+08	106644	114441	4.25254e+07	3.17935e+06
SE12A127	KC18-1-010	K feldspar		16.7578	0.0237831	15.5655	0.0302233	36.9112	0.0582413			2193.16	77632.1	1.33002e+06	1.25539e+06	2.97809e+06	262.583	579.095	7.45299e+07	71881	9.04223e+08	4.78316e+07	11785.5	1.47969e+09	20501.6	113420	5.1308e+06	1.32993e+07
SE12A128	KC18-1-011	K feldspar		18.1511	0.0479642	15.8405	0.0617688	38.6396	0.129781			2319.12	54426.3	1.00997e+06	895737	2.18574e+06	2980.37	1340.59	1.46029e+08	27261.1	8.04431e+08	4.10114e+07	36892.2	1.17326e+09	17266.3	9052.4	2.32104e+06	469086
SE12A129	KC18-1-012	plagioclase		17.9626	0.0524341	15.6671	0.0481578	37.9309	0.111309			2624.82	11942.1	219302	194403	470815	84.584	1268.28	6.57623e+08	2.96578e+06	8.77098e+08	3.39258e+07	13733.3	4.48227e+07	406106	23783.8	2.3184e+07	508571
SE12A130	KC18-1-013	K feldspar		16.8414	0.071321	15.4877	0.12283	36.3662	0.230385			1880.99	31371	540126	504873	1.18583e+06	66.5072	2391.05	6.14102e+07	7066.48	1.09482e+09	6.31614e+07	2174.97	2.0864e+09	12396.7	31855.9	1.58506e+06	1.18039e+07
SE12A131	KC18-1-014	K feldspar		17.6008	0.0568677	15.7153	0.042635	37.3467	0.147637			2156.88	23635.5	425287	385998	917560	2224.4	14279	3.66725e+08	217043	9.41932e+08	5.19679e+07	2988.68	1.21824e+09	30349.3	22478.7	7.05229e+06	1.05861e+06
SE12A132	KC18-1-015	K feldspar		16.5914	0.038998	15.4651	0.0404304	36.4602	0.0921275			1973.44	30353.4	514839	487854	1.15044e+06	21.2103	265.865	1.71002e+08	18608.2	7.75103e+08	3.92029e+07	66516.8	1.07531e+09	16696.3	64323.4	3.80804e+06	6.29738e+06
SE12A133	KC18-1-016P	plagioclase		18.183	0.111816	15.6208	0.0949768	38.2527	0.191783			2462.05	13785.3	256248	223811	548197	18705.3	18954.5	6.01732e+08	2.85571e+06	7.92036e+08	3.09057e+07	353789	1.00752e+08	325914	8612.1	2.08664e+07	130262
SE12A134	KC18-1-017	K feldspar		16.5148	0.0301329	15.6008	0.043199	37.1425	0.0950308			1637.59	60541.3	1.02212e+06	981739	2.33778e+06	40.8684	184.304	1.00069e+08	87655.4	7.93252e+08	4.08031e+07	75493.5	1.23933e+09	41213.9	12639.8	886381	1.02913e+07
FE15B0299	KC18-1-03	K feldspar		17.9951	0.044427	15.5902	0.0365811	37.8713	0.0828599			2003.01	40430.1	741628	644304	1.58104e+06	14169.1	4826.44	1.03079e+08	310280	9.17721e+08	4.8217e+07	56969.9	1.30997e+09	32379.1	45158.7	5.07516e+06	6.34302e+06
FE15B0300	KC18-1-04	K feldspar		17.684	0.0148357	15.8039	0.0137958	37.713	0.0613277			1763.21	65352.2	1.17805e+06	1.05574e+06	2.54489e+06	2675.61	314.956	1.36363e+08	417060	1.007e+09	5.38643e+07	258830	1.43243e+09	28941.4	183143	3.22118e+06	1.22275e+07
FE15B0301	KC18-1-05	K feldspar		17.9449	0.0415155	15.8144	0.0302177	38.5315	0.0792779			1672.94	48402.9	885385	782439	1.92572e+06	29636.9	2588.37	1.1585e+08	303859	1.07336e+09	5.96172e+07	14116.5	1.65749e+09	22558.1	168993	5.21663e+06	1.90359e+07
FE15B0302	KC18-1-06	K feldspar		18.7316	0.0343206	15.8566	0.037387	38.4759	0.0926741			1737.31	58955.3	1.12568e+06	955556	2.3421e+06	22169.7	3684.3	2.1669e+08	988313	9.42407e+08	5.06051e+07	45070.5	1.22507e+09	19913.3	60221.7	7.30938e+06	4.0802e+06
FE15B0303	KC18-1-07	K feldspar		18.2842	0.0377486	15.6951	0.0345681	38.1693	0.0838309			1805.56	39004	726939	625739	1.53711e+06	15.2318	53.7462	1.24709e+08	22974	8.23398e+08	4.21882e+07	6003.65	1.09539e+09	22241.1	21875.9	1.60997e+06	5.04615e+06
FE15B0304	KC18-1-08	plagioclase		18.0957	0.109852	15.4981	0.10756	37.0373	0.27465			2119.61	5099.53	94062.2	80784.3	195002	0.1	13.2744	6.72855e+08	38553.2	8.05398e+08	3.33929e+07	1294.34	2.98474e+07	340052	8560.56	4.33856e+06	197054
FE15B0305	KC18-1-09	K feldspar		17.9447	0.0547254	15.8542	0.0442537	37.9742	0.0981124			1712.83	34168.5	624982	553715	1.3396e+06	1393.3	236.92	2.6544e+08	323846	9.15924e+08	4.67993e+07	216643	1.04553e+09	47471.7	192704	1.42057e+06	5.24769e+06
FE15B0306	KC18-1-10	K feldspar		17.9595	0.0245734	15.8573	0.0278217					1693.17	108857	1.99275e+06	1.76439e+06	4.77833e+06	108154	740.63	1.34879e+08	190156	9.22312e+08	4.93528e+07	11459.7	1.31228e+09	22198.4	134637	4.13548e+06	4.63063e+06
FE15B0410	KC18-1-101	K feldspar		18.8	0.0572402	15.9583	0.0433236	38.0898	0.0791342			862.619	68127.6	1.30567e+06	1.11134e+06	2.6732e+06	21.6744	4.8372	3.45002e+08	64677.6	8.1978e+08	4.123e+07	16125.1	7.92906e+08	137922	70850.6	3.97841e+06	194608
FE15B0411	KC18-1-102	K feldspar		18.2639	0.0288098	15.7377	0.026284	38.12	0.0835851			919.376	69367.5	1.29153e+06	1.11594e+06	2.72397e+06	2471.53	163.794	1.30858e+08	2.50847e+06	9.08085e+08	4.91645e+07	58757.1	1.33427e+09	31014.4	45665.6	1.38265e+07	1.24917e+07
FE15B0412	KC18-1-103	K feldspar		17.9655	0.0452686	15.5959	0.0430755	37.6657	0.062818			759.118	27523.5	504086	438792	1.06791e+06	69316	11859	6.90159e+07	84523.2	9.06771e+08	4.87615e+07	24751.4	1.40249e+09	10555.6	33657.2	964539	3.33526e+06
FE15B0413	KC18-1-104	K feldspar		17.8755	0.0234281	15.6862	0.0150602	38.0268	0.0593774			971.378	48536.5	884490	778282	1.90125e+06	859.049	732.365	1.49858e+08	69964.2	8.43593e+08	4.37028e+07	119617	1.13303e+09	51856.9	78370.7	7.28278e+06	1.18754e+07
FE15B0414	KC18-1-105	K feldspar		17.7515	0.0465388	15.6474	0.0386806	37.7534	0.0838481			902.293	24166.5	437341	386555	939819	32.5639	215.859	2.70197e+08	274763	9.31384e+08	4.89902e+07	13963.9	1.14469e+09	36051.2	37673.8	2.94729e+06	2.13671e+07
FE15B0415	KC18-1-106	K feldspar		17.6192	0.0548445	15.456	0.040444	37.6693	0.102623			1012.47	27592.1	495617	435953	1.07063e+06	3114.23	463.06	5.82765e+07	70918	9.04998e+08	4.90034e+07	6832.84	1.42458e+09	19964.1	22798.1	2.95536e+06	8.63353e+06
FE15B0416	KC18-1-107	K feldspar		18.527	0.0386469	15.7135	0.0396032	37.7665	0.0709647			781.854	37845.3	714820	607921	1.47224e+06	224.11	148.491	1.52344e+08	1.05986e+06	9.42938e+08	5.10979e+07	114355	1.3638e+09	44740.4	35323.1	3.90385e+06	1.22869e+07
FE15B0417	KC18-1-108	K feldspar		18.0666	0.0271135	15.7717	0.0269776	38.0417	0.0689357			911.664	41758.1	769130	673264	1.63627e+06	465.514	94.2606	1.42605e+08	435844	9.41249e+08	4.89637e+07	282097	1.32615e+09	36691.6	93896.7	1.81466e+06	1.2748e+07
FE15B0418	KC18-1-109	K feldspar		18.2161	0.062601	15.7234	0.0476229	37.846	0.118568			841.251	31306.2	581396	503206	1.22039e+06	170.808	13.9073	1.91815e+08	41348.3	8.7363e+08	4.62097e+07	17384.2	1.17375e+09	29678.8	40669.8	1.3475e+06	9.63376e+06
FE15B0307	KC18-1-11	K feldspar		17.8685	0.0356611	15.7734	0.0194869	38.9727	0.131385			1651.98	76032	1.38479e+06	1.22583e+06	3.05909e+06	3889.2	33.7349	1.52329e+08	11354.7	9.44577e+08	5.00622e+07	4979.08	1.30496e+09	27304.3	88022.8	824401	6.75696e+06
FE15B0419	KC18-1-110	K feldspar		18.2415	0.0447236	15.8541	0.0356311	38.7318	0.0988092			802.287	44604.1	829520	722919	1.77944e+06	28272.3	5998.84	9.66063e+07	368559	9.22056e+08	4.99039e+07	5886.97	1.38755e+09	29237.6	58837.1	4.51709e+06	1.20928e+07
FE15B0420	KC18-1-111	K feldspar		19.0539	0.0385066	15.7469	0.0329563	37.9914	0.0854602			848.523	49226.7	956274	792452	1.92629e+06	519.658	300.821	1.29807e+08	165969	8.42183e+08	4.48519e+07	14217.6	1.21758e+09	7424.11	15059.7	1.74022e+06	743969
FE15B0421	KC18-1-112	K feldspar		18.2314	0.037935	15.6817	0.0275404	37.9594	0.0602535			855.172	20682.8	384443	331577	808643	12224.9	38612.9	2.33362e+08	73287.4	8.04997e+08	4.15467e+07	15996.5	9.62155e+08	17525.2	9667.63	3.4149e+06	6.11187e+06
FE15B0308	KC18-1-12	K feldspar		17.4747	0.0239807	15.6439	0.017072	37.5505	0.0450654			1619.14	46939.1	836070	750562	1.8196e+06	0.485138	5.23919	2.07506e+08	162605	8.67094e+08	4.45555e+07	354081	1.07028e+09	28673.7	61088.5	475658	6.64225e+06
FE15B0309	KC18-1-13	plagioclase		17.8409	0.0551349	15.7891	0.0762226	37.9607	0.152403			1977.3	10440.1	189853	168487	409124	398.032	104.133	6.31132e+08	781490	7.94599e+08	3.17356e+07	120693	3.44915e+07	313665	95800.7	2.02876e+06	57993.3
FE15B0310	KC18-1-14	K feldspar		18.2308	0.0324144	15.6574	0.0274904	38.2361	0.0939072			1545.64	36237.3	673367	579928	1.43032e+06	3683.04	2049.01	1.96017e+08	673940	9.60741e+08	5.14912e+07	52938.1	1.28947e+09	33567.6	55787.9	1.37829e+07	5.38669e+06
FE15B0311	KC18-1-15	K feldspar		17.9107	0.0487778	15.7341	0.0430797	37.926	0.110929			1546.04	56968.4	1.04e+06	916166	2.2303e+06	83496.9	9611.41	1.67481e+08	61860.2	9.0846e+08	4.81498e+07	293538	1.22802e+09	48692.5	88954.8	1.79926e+06	8.03079e+06
FE15B0313	KC18-1-17	K feldspar		17.8093	0.0599311	15.7891	0.0657623	38.144	0.141743			1636.64	72563.3	1.31718e+06	1.17102e+06	2.85701e+06	8368.85	1664.48	2.18713e+08	95287.1	8.30121e+08	4.23255e+07	107659	9.74546e+08	23868.3	53234.7	2.95915e+06	3.26072e+06
FE15B0315	KC18-1-19	K feldspar		17.8074	0.0218238	15.753	0.0143362	38.0565	0.0605582			1481.95	50205.4	911227	808349	1.97209e+06	54950.2	1099.73	1.05226e+08	352411	9.56642e+08	5.16395e+07	347002	1.4261e+09	31347.2	303142	6.24198e+07	1.01123e+07
FE15B0317	KC18-1-21	K feldspar		18.4616	0.057583	15.6685	0.0459646	38.2772	0.104935			1514.82	26078	490700	417623	1.03024e+06	30955	6518.63	9.71006e+07	190808	1.02948e+09	5.60072e+07	135249	1.54412e+09	22155.9	154798	507388	9.09012e+06
FE15B0318	KC18-1-22	K feldspar		17.8203	0.0402598	15.6997	0.0245233	37.7763	0.100284			1544.39	65593.8	1.19137e+06	1.05253e+06	2.55738e+06	21839.3	3905.7	1.21866e+08	550019	1.11083e+09	6.25772e+07	595804	1.79626e+09	22541.1	47846.4	8.43425e+06	9.25189e+06
FE15B0319	KC18-1-23	K feldspar		18.3011	0.0637743	15.7773	0.0293363	37.6763	0.0722952			1462.14	22145	413068	357097	861087	16301.1	958.587	6.70371e+07	2.91674e+06	9.83986e+08	5.30061e+07	19067.8	1.49369e+09	35733.1	119579	3.96466e+07	1.1559e+07
FE15B0320	KC18-1-24	K feldspar		17.825	0.0331402	15.5736	0.0203047	38.0248	0.0631048			1361.35	41435.8	752783	659540	1.62605e+06	24592.3	2811.12	1.72297e+08	855889	9.65944e+08	5.08246e+07	101010	1.3129e+09	19939.9	79940.2	7.08782e+06	6.56173e+06
FE15B0322	KC18-1-26	K feldspar		17.5538	0.022592	15.7008	0.0364587	37.5398	0.0718642			1392.51	26110.1	467134	418987	1.01151e+06	4332.65	738.761	1.24951e+08	790949	1.0387e+09	5.59382e+07	40803.4	1.50754e+09	18649.6	73127.2	1.35701e+07	4.56583e+07
FE15B0323	KC18-1-27	K feldspar		17.758	0.0330052	15.7447	0.0292506	38.9758	0.0564968			1209.04	49795.5	901244	801299	2.00284e+06	6022.45	103.571	8.17612e+07	406314	9.7144e+08	5.29934e+07	83290.2	1.48946e+09	12612.4	92232.1	3.63186e+06	4.56092e+06
FE15B0324	KC18-1-28	K feldspar		16.1046	0.0271935	15.0744	0.0317017	36.6258	0.0637164			1052.04	30419.3	499294	468660	1.1497e+06	39603.6	2386.04	5.84572e+07	190486	9.31579e+08	5.04279e+07	57578.9	1.41574e+09	11759.8	37285.4	2.18103e+06	5.06604e+06
FE15B0325	KC18-1-29	K feldspar		18.4563	0.069915	15.8387	0.0536814	38.8607	0.132317			1236.65	27399.2	515391	443530	1.09872e+06	57159.1	28172.4	3.3747e+08	6.48184e+06	9.87622e+08	5.18817e+07	151385	1.08248e+09	94893.2	183183	5.5708e+07	3.72834e+06
FE15B0326	KC18-1-30	K feldspar		18.2136	0.030466	15.7941	0.02018	37.8261	0.0685073			1119.45	46903.6	870675	757122	1.83074e+06	5685.85	1598.95	1.33728e+08	1.01425e+07	9.88964e+08	5.24052e+07	316615	1.37005e+09	32282.8	188493	3.40582e+07	7.90121e+06
FE15B0327	KC18-1-31	K feldspar		17.6359	0.0251498	15.5036	0.0212582	41.1645	0.101735			1265.36	86961.1	1.56306e+06	1.3779e+06	3.69373e+06	8328.07	632.89	9.9114e+07	226181	9.70096e+08	5.18761e+07	179861	1.43689e+09	23951.9	37916.7	1.36918e+06	9.02037e+06
FE15B0328	KC18-1-32	K feldspar		17.9386	0.0372108	15.7897	0.0352518	38.0882	0.0881199			1470.59	26477.1	484070	427272	1.04056e+06	4352.7	572.707	9.03173e+07	400974	7.77995e+08	4.00428e+07	5601.59	1.08363e+09	15375	36070.1	6.4586e+06	4.92873e+06
FE15B0329	KC18-1-33	K feldspar		18.0699	0.0175462	15.7952	0.0137763					1534.48	82626	1.52167e+06	1.33383e+06	3.51263e+06	5325.54	478.333	1.61448e+08	124870	8.39835e+08	4.27139e+07	157280	1.08617e+09	28460.7	32295.5	796757	5.4489e+06
FE15B0331	KC18-1-35	K feldspar		18.8187	0.0283427	15.8022	0.0262751	38.4085	0.0825139			1431.51	29540.3	566567	477077	1.17063e+06	24.984	64.4499	2.12674e+08	13917.9	8.28698e+08	4.19335e+07	4267.59	9.71402e+08	67790.4	46424.8	2.07516e+06	5.89517e+06
FE15B0332	KC18-1-36	K feldspar		17.9718	0.0345454	15.6726	0.0276591	38.3037	0.0880829			1242.59	31562.9	578114	505560	1.24734e+06	38311.4	4776.49	9.57896e+07	628614	1.00968e+09	5.60936e+07	39733.6	1.56148e+09	25145.9	74170	9.84076e+06	1.6082e+07
FE15B0338	KC18-1-38	plagioclase		17.6694	0.0946626	15.6671	0.0987775	37.8776	0.216172			1816.56	6181.56	111316	98976.9	241538	90.9117	200.279	4.78513e+08	1.00952e+06	8.2879e+08	2.87052e+07	8391.11	6.27073e+07	559709	9581.35	4.71259e+06	371805
FE15B0339	KC18-1-39	plagioclase		18.8109	0.12064	15.8717	0.103833	38.9531	0.260908			1748.75	4718.34	90455.8	76534.6	189595	37.2182	114.047	5.86537e+08	1.8167e+06	9.13549e+08	3.3788e+07	1747.86	9.80483e+07	431010	5940.12	5.49041e+06	292345
FE15B0340	KC18-1-40	K feldspar		18.4624	0.0368412	15.7129	0.0260753	37.8943	0.0639513			1224.35	50779.7	955465	815440	1.98494e+06	207.833	115.557	1.18823e+08	872603	8.55679e+08	4.39416e+07	73238.9	1.16905e+09	22286	27811.3	7.69993e+06	8.52664e+06
FE15B0341	KC18-1-41	plagioclase		17.8055	0.0863329	15.6173	0.0904734	37.9846	0.186815			1591.2	6081.75	110362	97068.8	238293	120.095	177.792	6.86503e+08	321015	8.31531e+08	3.3594e+07	7155.26	3.12069e+07	370708	7927.96	5.22834e+06	192865
FE15B0343	KC18-1-43	K feldspar		17.8977	0.0473505	15.7648	0.0520938	38.7886	0.102885			1378.72	30505.9	556436	491491	1.22051e+06	90283.3	10644.7	2.98478e+07	557432	9.16819e+08	4.86713e+07	6558.08	1.44976e+09	10609	63674.4	2.22449e+06	1.26816e+07
FE15B0344	KC18-1-44	K feldspar		17.7683	0.0384185	15.7051	0.0238108	38.0816	0.0672114			1276.3	61948.6	1.12178e+06	994292	2.43328e+06	28747.4	6236.31	3.3424e+08	393913	9.06864e+08	4.86878e+07	19835.9	1.04666e+09	30731.3	90242.3	2.90305e+06	4.94505e+06
FE15B0346	KC18-1-46	plagioclase		18.3019	0.0890004	15.692	0.0781284	37.9501	0.1888			1586.03	6852.53	127814	109893	268219	77519.6	304.242	7.4973e+08	130246	9.29883e+08	3.73606e+07	26234.6	2.14633e+07	462978	20093	990672	87941.5
FE15B0348	KC18-1-48	K feldspar		18.4284	0.14302	15.6647	0.134373	37.9771	0.311117			1391.56	7636.8	143427	122257	299116	520.899	86.0217	2.53528e+07	99139.5	1.00795e+09	5.44555e+07	4002.82	1.63634e+09	12214.4	4715.26	2.13954e+06	1.11345e+07
FE15B0349	KC18-1-49	K feldspar		18.1491	0.0235513	15.7003	0.0226807	38.2986	0.0830816			1392.08	31607.4	584623	507151	1.24844e+06	479.447	288.707	3.14789e+08	32308.2	8.2752e+08	4.20757e+07	44480.9	8.55297e+08	42781.8	43861.3	822033	7.82286e+06
FE15B0350	KC18-1-50	K feldspar		17.6978	0.0343734	15.7384	0.0279885	37.8001	0.070694			1293.34	58685.3	1.05847e+06	943907	2.28776e+06	160.883	43.0463	1.70565e+08	633848	1.02486e+09	5.61861e+07	241733	1.52893e+09	34750.1	181322	2.23478e+06	5.98834e+06
FE15B0353	KC18-1-52	K feldspar		19.0981	0.0675418	15.9154	0.0488606	37.7987	0.103487			1200.91	29545.7	575063	480562	1.15167e+06	16099.3	1624.43	3.66832e+08	243195	9.67555e+08	5.07883e+07	728627	1.08812e+09	49743.5	125040	3.41974e+06	2.30153e+06
FE15B0354	KC18-1-53	K feldspar		17.8166	0.0337662	15.692	0.0322094	37.9415	0.0908698			1239.21	39025.8	708610	625849	1.52692e+06	3.49462	1567.12	1.97228e+08	117575	8.24878e+08	4.23571e+07	38615.9	1.04413e+09	23403.5	23829.7	2.22976e+06	1.04547e+07
FE15B0355	KC18-1-54	K feldspar		17.8152	0.034897	15.752	0.0248488	38.6349	0.0649924			1124.66	36721.1	666711	591139	1.46297e+06	59331.6	5266.55	5.51493e+07	3.80042e+06	9.28378e+08	5.07791e+07	18730.8	1.41592e+09	20856	215519	1.1045e+07	1.51797e+07
FE15B0357	KC18-1-56	K feldspar		17.8671	0.0345823	15.714	0.0356121	39.0943	0.0885518			1074.67	30207.3	550047	485107	1.21772e+06	554514	23972	9.4728e+07	1.66158e+06	1.0688e+09	5.94224e+07	96977.2	1.63475e+09	20663.4	76942.5	2.78298e+07	7.51967e+06
FE15B0359	KC18-1-58	K feldspar		18.2225	0.0325007	15.756	0.0287991	38.3615	0.0793601			925.458	38137.3	708257	614095	1.50851e+06	7693.14	4518.04	1.45118e+08	3.78852e+06	8.85273e+08	4.50522e+07	15706.4	1.15128e+09	43366.1	144946	4.15736e+07	1.00803e+07
FE15B0361	KC18-1-60	K feldspar		17.9315	0.0333998	15.8251	0.0205079					1030.85	106654	1.94908e+06	1.7249e+06	4.73446e+06	112401	1208.94	1.18165e+08	698169	9.92005e+08	5.41017e+07	8497.12	1.50428e+09	18289.8	82858.4	1.589e+07	5.62981e+06
FE15B0363	KC18-1-62	K feldspar		17.9607	0.0807836	15.779	0.0560559	38.0742	0.14911			1247.75	6824.49	124920	110050	267898	365.27	138.45	4.20856e+08	426114	8.70776e+08	4.24341e+07	65042.7	7.21819e+08	97277.7	139011	1.7799e+06	6.69315e+06
FE15B0364	KC18-1-63	K feldspar		17.9072	0.029002	15.8403	0.0218798					1129.42	85713.4	1.56428e+06	1.38756e+06	3.79293e+06	75.9405	15.7895	7.7568e+07	15035.4	8.76943e+08	4.70207e+07	7426.87	1.34039e+09	2390.04	2808.45	1.17433e+06	65780.6
FE15B0365	KC18-1-64	K feldspar		17.7542	0.0502873	15.6428	0.036443	37.9622	0.108144			1002.97	29678.1	537002	474454	1.16155e+06	511.212	376.13	3.54183e+08	285420	8.12871e+08	4.20202e+07	2384.95	7.61516e+08	67774.7	18949.1	5.68831e+06	8.62943e+06
FE15B0366	KC18-1-65	plagioclase		17.4581	0.0941535	15.4972	0.0882522	37.2422	0.154442			1552.29	5857.19	104214	92765.5	224888	1212.57	246.916	5.92098e+08	315656	7.90554e+08	3.06882e+07	8404.93	5.12499e+07	389068	18285.7	6.42343e+06	326264
FE15B0369	KC18-1-68	K feldspar		18.3134	0.0360368	15.7744	0.0328948	38.2711	0.0757712			1259.72	32911.1	614263	530568	1.29846e+06	0.672071	56.653	1.28274e+08	80230.1	8.75847e+08	4.49191e+07	52938.7	1.19874e+09	47844.4	38317.8	1.67856e+06	1.59512e+07
FE15B0370	KC18-1-69	K feldspar		18.4297	0.0994654	15.7151	0.0843041	38.0609	0.184271			1395.57	9084.94	170641	145911	356458	1502.08	2624.12	2.37916e+07	227061	9.87391e+08	5.65268e+07	3511.96	1.68701e+09	9323.89	123256	956942	3.5416e+06
FE15B0371	KC18-1-70	K feldspar		18.7353	0.113604	15.8492	0.0925182	38.4191	0.189595			1151.01	13171.2	251497	213345	521642	921.703	934.853	4.16235e+08	272392	8.01027e+08	4.13871e+07	12184	7.43964e+08	19704.1	3514.3	2.49787e+06	4.67925e+06
FE15B0372	KC18-1-71	K feldspar		17.7801	0.0438608	15.7189	0.0287178	38.1829	0.0969586			1316.12	50835.4	921185	816651	2.0009e+06	531.135	589.483	2.41339e+08	499770	9.06608e+08	4.62465e+07	218207	1.08057e+09	35284.1	194696	6.95814e+06	7.20074e+06
FE15B0373	KC18-1-72	K feldspar		18.6946	0.051989	15.8511	0.0393234	39.0882	0.0926698			1113.19	31805.2	605984	515237	1.28152e+06	2172.7	275.605	1.0735e+08	409912	1.03406e+09	5.64266e+07	19597.3	1.58121e+09	23449.2	60203.1	7.35923e+06	1.73774e+07
FE15B0375	KC18-1-74	K feldspar		18.1083	0.027378	15.8239	0.0255905	38.4313	0.0589877			1106.99	47602.2	878531	769827	1.88572e+06	238.195	93.2008	2.05449e+08	1.64366e+06	9.71689e+08	5.12707e+07	156492	1.32283e+09	30831.7	98145.3	4.42871e+06	5.5673e+06
FE15B0376	KC18-1-75	K feldspar		17.954	0.0456964	15.6672	0.0552551	37.5769	0.114805			1249	34828.4	637305	557672	1.349e+06	1205.31	534.531	1.20704e+08	85704.5	8.99657e+08	4.7271e+07	5213.3	1.27781e+09	26069	16249.1	2.40564e+06	5.50209e+06
FE15B0381	KC18-1-76	K feldspar		18.0314	0.0723512	15.8724	0.0703739	38.0478	0.132694			1065.73	38210.7	702228	619857	1.49841e+06	20922.8	10112.4	9.00142e+07	1.54535e+06	9.77143e+08	5.15492e+07	143389	1.41677e+09	17435.5	451659	2.6004e+08	1.09688e+07
FE15B0382	KC18-1-77	K feldspar		18.0033	0.0234753	15.6652	0.0222074					1049.93	89036.2	1.63374e+06	1.4255e+06	3.887e+06	6573.24	278.596	1.11531e+08	796718	9.43679e+08	5.08767e+07	64722.8	1.42163e+09	26606.1	64166.9	1.17428e+07	6.88749e+06
FE15B0384	KC18-1-79	K feldspar		15.8302	0.0380729	15.0431	0.0403319	37.147	0.0891506			868.288	31930.8	515187	490924	1.22243e+06	9593.76	416.001	7.58809e+07	26112.5	7.46281e+08	3.9449e+07	8275.79	1.08656e+09	12464.6	14463.9	1.56063e+06	2.29603e+06
FE15B0387	KC18-1-82	plagioclase		18.0302	0.059965	15.63	0.0490232	37.7875	0.0729299			1410.26	4458.82	81940.1	71228.1	173634	54.929	22.804	6.31508e+08	65015.2	7.79586e+08	3.11001e+07	4294.75	1.87905e+07	369512	29011.2	6.48144e+06	130528
FE15B0388	KC18-1-83	K feldspar		17.8946	0.02494	15.7865	0.0325799	38.1109	0.08481			997.639	39401.8	718649	635736	1.54748e+06	340.012	117.335	1.45078e+08	770018	8.50549e+08	4.34386e+07	201956	1.11543e+09	38924.6	215579	3.347e+06	1.15938e+07
FE15B0389	KC18-1-84	K feldspar		18.7391	0.0328121	15.8821	0.0428108	38.729	0.077976			1089.37	27413.9	523600	444996	1.0941e+06	1145.65	300.985	2.24036e+08	92202.9	8.37315e+08	4.32546e+07	21468.4	1.02095e+09	32796.5	68119.5	1.36817e+06	3.05622e+06
FE15B0390	KC18-1-85	plagioclase		18.1612	0.144938	15.4862	0.120798	36.8451	0.269372			1304.82	4356.56	80644.1	68955.7	165412	25.8258	149.365	7.86835e+08	222394	7.78838e+08	3.52289e+07	2131.68	1.2516e+07	204430	624.302	1.00427e+06	40402.7
FE15B0391	KC18-1-86	K feldspar		17.6826	0.0541707	15.6384	0.0404385	38.1196	0.0825803			905.932	25293.2	455865	404276	993550	35999.5	5790.75	1.45361e+08	97285.7	8.80142e+08	4.74292e+07	6281.14	1.27107e+09	19328.2	37201.9	2.50001e+06	7.82973e+06
FE15B0392	KC18-1-87	K feldspar		17.8045	0.0367344	15.7764	0.0424279	37.8481	0.0975178			858.657	39690.8	720295	640003	1.54797e+06	548.406	1642.67	1.61532e+08	1.99408e+06	9.4582e+08	5.00393e+07	330960	1.29252e+09	50405.6	159500	3.65309e+06	8.24168e+06
FE15B0394	KC18-1-89	K feldspar		18.8139	0.0294581	15.7311	0.0343389	38.244	0.070228			736.216	25952.1	497678	417273	1.02271e+06	5004.97	1109.27	1.30848e+08	307295	8.73006e+08	4.60916e+07	10813.2	1.2474e+09	9039.77	40396.3	3.65775e+06	799260
FE15B0396	KC18-1-91	K feldspar		17.7352	0.0641914	15.7392	0.0696089	38.6479	0.141772			904.167	18545.4	335256	298343	738521	9488.04	1555.41	7.18839e+07	2.07237e+06	9.28592e+08	5.0408e+07	5956.59	1.42101e+09	15557	105685	1.26926e+07	1.22309e+07
FE15B0397	KC18-1-92	K feldspar		18.9778	0.0333814	15.7288	0.0295218	37.7403	0.0681702			972.809	25512.6	493521	410155	992091	519.716	212.495	5.13053e+08	32364.3	8.88253e+08	4.51949e+07	116301	7.08648e+08	73608	85010.1	1.296e+06	274082
FE15B0398	KC18-1-93	plagioclase		18.6764	0.160017	15.9951	0.138896	40.1679	0.318514			1260.32	3017.71	57448.6	49336.1	124894	14.1907	123.565	6.10525e+08	74793.7	7.74777e+08	3.02804e+07	3600.47	1.08439e+07	395588	15176.2	2.0504e+06	446354
FE15B0399	KC18-1-94	K feldspar		18.2155	0.0390579	15.8503	0.0231652	38.865	0.0850368			947.444	29040	539200	470476	1.16287e+06	3910.56	4017.68	1.62155e+08	5.67118e+06	9.89551e+08	5.28433e+07	666596	1.40648e+09	42622.4	94534.9	6.17136e+06	4.82054e+06
FE15B0401	KC18-1-96	K feldspar		17.9138	0.0227178	15.7546	0.0176222	37.8858	0.0694282			841.689	48919.6	893285	787770	1.90951e+06	2245.24	170.09	1.09523e+08	395733	9.72312e+08	5.27882e+07	107522	1.47677e+09	27771.7	90547.7	6.88271e+06	9.6874e+06
FE15B0403	KC18-1-98	K feldspar		17.7767	0.0438438	15.777	0.0383278					891.96	85791.9	1.55461e+06	1.38352e+06	3.64754e+06	61136.9	116244	7.8288e+07	571158	1.03265e+09	5.68854e+07	321058	1.62086e+09	18034.7	265635	5.47348e+06	4.85464e+06
FE15B0404	KC18-1-99	K feldspar		17.4316	0.0303838	15.6059	0.0248163	37.77	0.0809104			875.283	35338.9	627943	563715	1.37512e+06	20.9192	82.702	2.12061e+08	324812	8.25704e+08	4.19294e+07	137428	9.97161e+08	36061.2	144282	941005	5.15364e+06
FE15B0242	KC18-2-02-alb	plagioclase		18.0757	0.0704377	15.6861	0.0614864	38.0666	0.127862			2892.96	11958.9	220514	191886	470879	301.438	712.768	6.55703e+08	198328	7.93441e+08	3.28421e+07	40946.9	1.83332e+07	322934	9787.22	2.68388e+06	41361
FE15B0243	KC18-2-03-alb	plagioclase		17.9005	0.069798	15.627	0.0517528	37.7456	0.161269			2851.26	12050.6	220046	192625	470471	55.9804	385.019	6.98492e+08	53469.7	7.84474e+08	3.57112e+07	21424.7	1.56628e+07	298881	8846.11	1.30666e+06	53292.7
FE15B0244	KC18-2-04	K feldspar		17.6264	0.051139	15.6534	0.0346421	38.1757	0.0975446			2430.16	30091.5	541053	481810	1.18816e+06	726.433	341.638	6.17657e+07	23092.9	8.02004e+08	4.22049e+07	967.133	1.15233e+09	9218.58	23735.3	2.40379e+06	3.18548e+06
FE15B0245	KC18-2-05	K feldspar		17.3813	0.0564893	15.6132	0.0294725	38.0461	0.147437			2495.04	42083.9	746145	672084	1.65599e+06	673.607	814.8	1.69316e+08	236578	8.34366e+08	4.43464e+07	6535.96	1.09901e+09	28646.6	38233.1	1.47392e+06	4.8636e+06
FE15B0246	KC18-2-06	K feldspar		16.5858	0.0567656	15.4917	0.0643444	36.3447	0.160978			2345.57	23289.2	394012	369030	875412	301.299	171.8	1.786e+08	128365	9.19161e+08	4.9335e+07	26885.3	1.20763e+09	40088.1	59171.3	3.02121e+06	5.21597e+06
FE15B0247	KC18-2-07	plagioclase		17.704	0.16196	15.4558	0.144143	36.71	0.335869			1569.19	7325.65	132290	115808	278121	276.633	3134.04	8.78172e+08	6.9609e+06	9.51305e+08	4.29928e+07	24288.2	9.51802e+07	140684	11290.1	1.35735e+07	264574
FE15B0248	KC18-2-08	K feldspar		16.7754	0.0448418	15.5972	0.0396684	36.7693	0.0767788			1398.78	39314.6	672714	627188	1.49495e+06	1623.56	1247.55	1.87132e+08	34643.2	9.16052e+08	4.99363e+07	91748.7	1.23057e+09	16735.9	44639.4	1.36151e+06	3.45707e+06
FE15B0249	KC18-2-09	K feldspar		17.9531	0.0287446	15.7166	0.0304666	38.1903	0.0606072			1354.48	32365	592668	520262	1.27821e+06	476.171	3240.37	1.10555e+08	31137.2	8.61966e+08	4.62201e+07	36044.9	1.22138e+09	7962.02	24477.1	5.15256e+06	1.59463e+06
FE15B0252	KC18-2-12	K feldspar		16.8199	0.0343272	15.5872	0.0351074	36.9636	0.0733818			1511.8	31035.6	532425	494762	1.18622e+06	503.034	787.768	1.14848e+08	164009	9.27421e+08	5.1317e+07	88770.8	1.34217e+09	12926.6	17226.3	1.70112e+06	6.80917e+06
FE15B0254	KC18-2-14	K feldspar		18.6221	0.0253414	15.8417	0.0163189	38.5389	0.0558983			1529.4	44448.7	844211	720143	1.77118e+06	58.7198	25.7561	2.22841e+08	118809	8.82974e+08	4.48244e+07	337574	1.02459e+09	67080.7	99909.8	386493	1.01197e+07
FE15B0256	KC18-2-16-alb	plagioclase		16.8758	0.0474063	15.5354	0.0670145	36.6951	0.0867148			1922.29	5615.94	96657.4	89225.5	213063	2159.39	1548.95	6.07882e+08	1.87974e+06	9.50153e+08	3.44272e+07	2089.6	9.08773e+07	479106	11520.1	1.88711e+07	663702
FE15B0257	KC18-2-17	K feldspar		16.8458	0.0500588	15.4962	0.0492697	36.8401	0.108959			1523.16	18014.1	309489	285480	686115	84.6566	133.372	2.37897e+08	7.32772e+06	9.81763e+08	5.20417e+07	64519.5	1.17499e+09	73318.4	196505	2.27119e+07	1.22028e+07
FE15B0258	KC18-2-18-alb	plagioclase		17.6369	0.117253	15.7178	0.0897093	38.2001	0.181134			2017.48	8069.4	145144	129707	318681	2.06611	11.157	6.58058e+08	35401.3	8.35287e+08	3.33142e+07	765.281	9.2868e+06	413839	3177.56	3.63157e+06	51267.7
FE15B0259	KC18-2-19	plagioclase		16.5423	0.0815799	15.3137	0.0912436	36.5822	0.229711			2000.55	4248.75	71677.8	66537.5	160682	35882.2	2459.48	6.94072e+08	4.6322e+06	8.92064e+08	3.57195e+07	2711.83	6.05019e+07	308594	2578.76	7.98285e+06	71153.3
FE15B0260	KC18-2-20	K feldspar		17.8862	0.0549533	15.7491	0.0504091	38.3617	0.106845			1749.02	42417.9	773728	683163	1.68217e+06	15417.9	1367.69	1.04284e+08	29320.2	8.93551e+08	4.74375e+07	59801.5	1.27317e+09	10632.4	37005.2	2.04697e+06	2.48937e+06
FE15B0261	KC18-2-21	plagioclase		18.7799	0.0776545	15.7816	0.0543075	37.5272	0.127734			2118.54	8655.89	165775	139693	335790	232.488	158.572	2.8981e+08	2.7717e+06	1.01115e+09	2.80402e+07	4463.2	4.80716e+07	1.54095e+06	1691.37	1.33178e+07	102111
FE15B0262	KC18-2-22	plagioclase		16.7798	0.0601596	15.4885	0.063494	36.5482	0.160738			1704.85	9313.78	159376	147517	351874	31.6372	1680.21	6.50399e+08	31346.8	8.59638e+08	3.4046e+07	0.1	2.54691e+07	516467	3936.1	2.04058e+06	67300.1
FE15B0263	KC18-2-23-alb	plagioclase		17.3458	0.0917742	15.551	0.0824464	37.6358	0.199467			2033.11	6371	112695	101314	247851	4834.81	1269.29	4.47129e+08	88561	8.54727e+08	2.93931e+07	6104.23	5.95565e+06	708724	4411.92	1.12285e+06	241479
FE15B0264	KC18-2-24	K feldspar		17.8167	0.0350463	15.6667	0.0306362	38.2207	0.0794394			1568.61	41424.7	752633	663641	1.63654e+06	340.55	1146.71	6.93355e+07	58524.5	1.0048e+09	5.52876e+07	18553.7	1.57809e+09	18586.3	29047	6.97927e+06	3.66885e+06
FE15B0265	KC18-2-25-alb	plagioclase		16.6929	0.0371786	15.4754	0.0509465	36.4091	0.11896			2178.86	8941.27	152202	141492	336484	279.165	669.845	4.32855e+08	54900	8.26079e+08	2.68035e+07	8265.46	1.20537e+07	678701	85862.4	6.30528e+06	132575
FE15B0266	KC18-2-26	K feldspar		16.7326	0.0309923	15.5607	0.0336098	36.5185	0.0837524			1442.36	35845.9	611630	570365	1.35299e+06	13.8461	367.424	1.28346e+08	86971.4	9.64401e+08	5.24798e+07	0.1	1.39846e+09	21753.7	28564	4.94758e+06	1.15831e+07
FE15B0267	KC18-2-27	plagioclase		16.8144	0.0958821	15.5882	0.077794	36.7451	0.182366			1532.71	4247.44	72826.1	67702.2	161308	375.23	817.73	5.41417e+08	2.84892e+06	9.13019e+08	3.23524e+07	16865	1.09351e+08	517235	6035.15	1.52817e+07	394712
MA06A0041	KC18-3-01	K feldspar		16.0292	0.0244236	15.3131	0.0252385	38.2868	0.0619686			97.6002	46650.1	760064	718435	1.80482e+06	16.5189	11.1697	9.24478e+07	24952.2	6.70519e+08	3.77046e+07	18185.7	1.05954e+09	20160.9	32560.3	1.11117e+06	1.4543e+07
MA06A0042	KC18-3-02	K feldspar		15.9855	0.0423852	15.3245	0.0294762	35.6323	0.0866526			82.2982	26561	431579	409350	956348	96.0928	35.2499	7.62213e+07	30956.9	7.83372e+08	4.52337e+07	3250.81	1.33585e+09	15273.2	24532.8	3.84744e+06	1.5986e+07
MA06A0043	KC18-3-03	K feldspar		16.695	0.0190853	15.532	0.0315959	36.5621	0.0642145			154.323	76140.6	1.29211e+06	1.18933e+06	2.81302e+06	232.024	3793.29	1.22934e+08	22326.6	1.05177e+09	6.58797e+07	10450.3	1.9668e+09	44090.7	109899	7.5308e+06	2.39238e+07
MA06A0044	KC18-3-04	K feldspar		16.721	0.0293116	15.5767	0.0371238	36.488	0.0856321			126.718	37851.5	643349	592941	1.39558e+06	1.26709	12.1681	9.19172e+07	14719.2	8.38198e+08	4.90756e+07	7714.62	1.43924e+09	19482	30002	3.40978e+06	2.44852e+07
MA06A0045	KC18-3-05-alb	plagioclase		18.0795	0.0378565	15.7481	0.0299221	38.251	0.0810635			71.5976	11469.6	210785	181647	443313	28.8136	3.10092	4.74224e+08	192666	7.29433e+08	2.98901e+07	44486.6	1.89295e+07	555975	16616.9	3.75756e+06	90762.5
MA06A0047	KC18-3-07-alb	K feldspar		18.265	0.0629824	15.6161	0.0314427	38.3832	0.130647			55.8564	14237.5	264344	223586	552186	380397	134141	1.8887e+08	6.59141e+06	5.87862e+08	8.92382e+07	7383.11	7.82564e+08	110669	247151	7.13026e+07	4.52641e+06
MA06A0048	KC18-3-08-alb	plagioclase		17.018	0.0298374	15.4951	0.0423737	36.8339	0.109001			48.4075	4808.18	83177.8	74921.6	178951	993.479	675.351	1.07363e+09	4.37165e+06	9.36134e+08	5.38189e+07	1037.05	2.28906e+07	68826.6	61090.3	3.90363e+07	296565
MA06A0050	KC18-3-10	plagioclase		17.7458	0.052458	15.711	0.0587276	38.3358	0.13392			0.0001	9797.62	176742	154790	379509	36.9305	133.084	5.68632e+08	108588	7.6319e+08	3.32387e+07	2343.19	1.8308e+07	487188	9055.66	3.98651e+06	112384
MA06A0051	KC18-3-11	K feldspar		16.8649	0.0702344	15.581	0.0529324	36.7827	0.0863481			34.6235	21357.5	366154	334625	793755	9.37385	25.8397	4.58519e+07	10649.4	9.08165e+08	5.58447e+07	3260.47	1.7585e+09	4190.76	21720.3	2.14882e+06	4.63925e+06
MA06A0052	KC18-3-12	K feldspar		16.6819	0.0476937	15.5478	0.0479058	36.7403	0.108618			52.1925	23440.7	397512	366477	870169	454.606	835.055	2.41349e+08	66438.8	8.09638e+08	4.75673e+07	9091.53	1.165e+09	21859.7	163223	5.32297e+06	4.77698e+06
MA06A0103	KC18-5-02	K feldspar		19.2399	0.0417473	16.0204	0.045677	38.8912	0.0987926			113.731	43984.3	860206	708017	1.72694e+06	435.627	1748.23	1.2036e+08	33635	8.10335e+08	5.01073e+07	38627.4	1.49365e+09	13102.2	12254.3	6.52776e+06	4.05142e+06
MA06A0104	KC18-5-03	K feldspar		17.8644	0.0346199	15.6405	0.0293068	37.9818	0.0834739			67.1277	27337.4	496413	429607	1.04822e+06	147.586	601.711	1.61162e+08	149506	8.28966e+08	5.08187e+07	2699.89	1.45798e+09	11674.3	16955.8	8.86869e+06	1.03709e+06
MA06A0105	KC18-5-04	plagioclase		18.3694	0.0958868	15.8147	0.0854127	37.9757	0.186912			70.0674	12170.1	227239	193380	466562	202.702	30.3867	6.40371e+08	79417.7	7.44673e+08	3.51385e+07	44120.8	4.20157e+07	295237	23029	1.58382e+06	141796
MA06A0106	KC18-5-05	K feldspar		19.2803	0.0313043	16.0295	0.0264647	38.0314	0.078197			96.5905	68056.6	1.33374e+06	1.09607e+06	2.61284e+06	6.43015	307.992	1.20191e+08	123591	7.72213e+08	4.62289e+07	62171.9	1.38053e+09	13831.5	10679.2	1.91397e+06	1.06189e+06
MA06A0107	KC18-5-06	K feldspar		17.8248	0.0305217	15.6479	0.0387092	37.7989	0.0525612			126.876	46017.3	833738	723466	1.75586e+06	34.9779	145.345	8.6388e+07	27894.4	7.96027e+08	4.81607e+07	9899.84	1.48684e+09	12269.2	29666.7	2.64329e+06	7.73177e+06
MA06A0108	KC18-5-07	K feldspar		17.8687	0.048622	15.6469	0.0363485	37.9871	0.0784526			132.604	25269.6	458956	397248	968982	85.7804	93.7925	1.15178e+08	42727.6	6.65517e+08	3.92578e+07	5085.23	1.13186e+09	8990.32	21145	3.92282e+06	5.62039e+06
MA06A0110	KC18-5-09	K feldspar		17.558	0.0418255	15.6372	0.0375158	38.3458	0.0972079			119.739	27369.4	488434	429975	1.05936e+06	14.6064	19.041	9.80187e+07	26167.4	6.53183e+08	3.75419e+07	41204.5	1.08395e+09	15487.2	33168.8	2.03719e+06	4.22659e+06
MA06A0111	KC18-5-10	K feldspar		17.4502	0.0195271	15.6466	0.0225458	38.1461	0.0457692			85.356	33787.1	599255	531109	1.30092e+06	40.9923	16.8453	2.16871e+08	16772.1	7.30586e+08	4.27833e+07	2931.71	1.07257e+09	24369.9	48646.1	5.34492e+06	3.66041e+06
MA06A0112	KC18-5-11	K feldspar		17.9007	0.0347537	15.7067	0.0222294	37.8148	0.0363394			98.279	62151.4	1.13077e+06	980707	2.3722e+06	77.3747	52.5645	9.51221e+07	166694	8.00795e+08	4.9828e+07	49525.9	1.53235e+09	42682.3	30428.2	2.25646e+06	7.76026e+06
MA06A0113	KC18-5-12	K feldspar		18.0788	0.0378643	15.734	0.0236759	38.0401	0.080006			27.1863	49341.1	906622	779910	1.89443e+06	414.713	187.71	9.30298e+07	24329.7	8.03855e+08	4.97228e+07	5601.04	1.54514e+09	9165.37	28304.8	2.62339e+06	7.13529e+06
MA06A0114	KC18-5-13	K feldspar		18.4679	0.0234797	15.8873	0.019172	38.2361	0.0598183			79.4083	58222.7	1.09283e+06	929250	2.2469e+06	12.2598	31.5942	8.80466e+07	30427.5	7.14753e+08	4.13496e+07	31547.9	1.25017e+09	23452.2	28020.4	1.72918e+06	1.40106e+07
MA06A0115	KC18-5-14	K feldspar		18.3228	0.0452155	15.7906	0.0382208	37.9807	0.0877366			104.967	32557.4	606285	516450	1.24801e+06	557.439	16.3631	1.82585e+08	24296.9	7.88629e+08	4.62223e+07	17798.2	1.23523e+09	28368.4	51707.2	2.65254e+06	9.55213e+06
MA06A0116	KC18-5-15	K feldspar		18.2312	0.0349874	15.7747	0.031891	38.1249	0.103386			74.8226	77337.6	1.43296e+06	1.22553e+06	2.97574e+06	5956.57	1153.31	1.8255e+08	265814	8.25974e+08	4.97083e+07	131050	1.4002e+09	28338.2	34709.5	1.0199e+07	4.37362e+06
MA06A0117	KC18-5-16	K feldspar		17.7865	0.0265081	15.6782	0.0265931	38.4811	0.0730566			92.915	60346.1	1.09084e+06	950413	2.34359e+06	453.077	367.621	1.08603e+08	18385.2	7.60006e+08	4.62029e+07	10674.6	1.40842e+09	10647.5	64527.2	2.88131e+06	6.98938e+06
MA06A0118	KC18-5-17	K feldspar		17.7771	0.0403265	15.6767	0.0409762	38.2047	0.0796455			77.8046	47453.6	857326	747277	1.82961e+06	141.302	84.0911	2.03646e+08	94844.1	8.10673e+08	4.8994e+07	10444.8	1.32753e+09	28591.5	28433.5	3.41783e+06	6.0582e+06
MA06A0119	KC18-5-18	K feldspar		17.5525	0.0297383	15.6224	0.0363103	37.6378	0.0660495			97.689	48128.6	858520	755269	1.82806e+06	327.054	50.9232	1.38247e+08	43871.5	6.89221e+08	4.04453e+07	41233.4	1.13466e+09	27162.9	24410.5	1.67389e+06	8.23786e+06
MA06A0121	KC18-5-20	K feldspar		18.0557	0.0322775	15.7558	0.0245085	37.9992	0.0427177			88.4993	54127.6	993175	856632	2.07555e+06	19.1876	53.2584	8.39719e+07	24392.2	7.25962e+08	4.32956e+07	131869	1.33264e+09	6800.01	14231.6	1.22086e+06	2.96467e+06
MA06A0123	KC18-5-22	K feldspar		17.6846	0.0653663	15.6342	0.0624844	38.1575	0.192541			56.3566	46459.7	834932	729574	1.78884e+06	46220.4	1810.6	1.97605e+08	36350.8	6.71672e+08	4.15196e+07	15603.6	1.06106e+09	13064	33409.9	2.42485e+06	7.99488e+06
MA06A0124	KC18-5-23-alb	plagioclase		18.9368	0.0758834	15.9847	0.0615987	37.8495	0.159325			66.1069	11447	220276	183784	437176	4.20973	11.7778	3.69072e+08	76426.5	6.00748e+08	2.35942e+07	6518.63	1.22217e+07	503644	5890.17	827962	137477
MA06A0125	KC18-5-24	K feldspar		17.0981	0.0315649	15.5254	0.0465365	37.814	0.0464249			109.961	37873.1	658026	590578	1.44503e+06	2093.61	1235.1	1.87507e+08	13776.8	7.40762e+08	4.34957e+07	4824.7	1.13241e+09	35626.3	55432.7	5.94459e+06	1.10486e+07
MA06A0132	KC18-5-25-alb	K feldspar		17.0736	0.026508	15.5029	0.0332896	37.7684	0.097289			33.4896	30063.9	521524	468065	1.14546e+06	774.936	807.358	1.33903e+08	115384	7.84915e+08	4.72014e+07	3028.74	1.37729e+09	14008.8	25789.3	6.58217e+06	9.51085e+06
MA06A0133	KC18-5-26	K feldspar		17.4946	0.0448142	15.654	0.0373607	38.106	0.0670679			64.7103	33347	592727	524227	1.28187e+06	121.302	119.555	1.29635e+08	72972.9	7.06257e+08	4.10327e+07	5001.28	1.16128e+09	23392.7	49584.8	1.91128e+06	1.59619e+07
MA06A0134	KC18-5-27	K feldspar		18.3929	0.0403758	15.892	0.0363576	38.3786	0.0761835			31.4177	91486.4	1.70958e+06	1.46004e+06	3.54181e+06	38.4429	43.3209	1.01727e+08	95995.4	7.34899e+08	4.40944e+07	110109	1.33676e+09	18140.6	27707.7	1.41489e+06	5.36686e+06
MA06A0135	KC18-5-28	K feldspar		18.0143	0.0418434	15.7049	0.0261956	36.7439	0.0905322			40.4613	61791.9	1.1309e+06	974519	2.29026e+06	0.1	26.5703	1.16257e+08	23027.5	7.84554e+08	4.8498e+07	34947.8	1.46038e+09	17549.3	4699.26	3.79728e+06	1.34339e+06
MA06A0136	KC18-5-29	K feldspar		17.7453	0.0366635	15.6375	0.023595	38.4151	0.0550055			88.4045	42719.9	770156	670828	1.65534e+06	122.525	195.536	1.53988e+08	134254	7.9393e+08	4.91244e+07	19434.1	1.42159e+09	11865.3	23842.2	1.17458e+07	6.08916e+06
MA06A0137	KC18-5-30	K feldspar		17.758	0.0293486	15.6956	0.0266608	37.9501	0.0676806			79.2158	65495.7	1.18157e+06	1.03227e+06	2.50707e+06	15.7129	23.2517	9.71702e+07	47400	7.45932e+08	4.40628e+07	104045	1.32603e+09	22571.9	27522.9	486894	1.10802e+07
MA06A0138	KC18-5-31	K feldspar		18.0006	0.0515739	15.7529	0.0652672	38.1427	0.146804			92.1226	23375.6	427459	369761	899296	4280.58	3204.64	3.59839e+08	239268	7.39756e+08	4.25781e+07	11561.8	8.35929e+08	58552.8	27962.1	4.64605e+06	1.51109e+07
MA06A0139	KC18-5-32	K feldspar		18.1191	0.0411102	15.7055	0.0492741	37.7236	0.108899			67.8382	37800.3	695769	596122	1.43821e+06	842.388	480.706	2.08246e+08	151865	7.37177e+08	4.38047e+07	21213.1	1.14689e+09	16275	14413.4	5.83023e+06	6.79891e+06
MA06A0140	KC18-5-33	K feldspar		18.0607	0.0423514	15.7047	0.0445191	38.0404	0.0999027			46.6268	32902.4	603652	518847	1.26233e+06	2.71539	44.9444	1.0531e+08	8361.95	6.95753e+08	4.18186e+07	1799.12	1.24474e+09	8419.67	18237.1	6.82222e+06	730076
MA06A0141	KC18-5-34	plagioclase		18.7636	0.0441343	15.8991	0.0435291	38.5474	0.110458			58.4488	11710.6	223207	186948	455261	3.51995	7.70521	4.55615e+08	5760.4	5.4699e+08	2.52879e+07	62746.7	2.16963e+07	264313	17513.4	1.59947e+06	69272.3
MA06A0142	KC18-5-35-alb	K feldspar		17.9731	0.0809962	15.674	0.0513949	38.0969	0.120076			56.9325	38434.7	701697	604876	1.47668e+06	148.657	2528.41	2.26063e+08	56588.9	7.67266e+08	4.57689e+07	98181.7	1.1877e+09	23830.5	22064.5	5.01678e+06	2.93022e+06
MA06A0143	KC18-5-36	K feldspar		17.6486	0.0497778	15.7667	0.0347232	37.8557	0.0758184			98.0145	47010.1	842737	744194	1.79466e+06	0.1	2.5776	1.8391e+08	133267	7.87447e+08	4.50756e+07	286965	1.21103e+09	59100.2	89712.8	567609	1.00824e+07
MA06A0144	KC18-5-37-alb	plagioclase		17.1962	0.0748223	15.68	0.0744107	39.7694	0.170127			43.5055	7414.37	129505	116725	297351	119.474	135.626	3.422e+08	53573.5	5.94165e+08	2.26169e+07	12455.1	1.76013e+07	530776	13174.8	3.53869e+06	146552
MA06A0145	KC18-5-38	K feldspar		17.4247	0.0682456	15.5773	0.0487644	38.0012	0.112287			63.0217	27263.6	482522	426395	1.04475e+06	1082.51	457.219	2.8438e+08	11842.8	7.20909e+08	4.2923e+07	4089.35	9.78232e+08	24801.2	54513.3	3.13856e+06	9.09762e+06
MA06A0147	KC18-5-40	K feldspar		18.432	0.0344298	15.8402	0.0314898	38.6648	0.0906618			82.6491	50177.7	939359	797980	1.95628e+06	4.1097	3.24105	1.10758e+08	26916.5	6.72403e+08	3.93503e+07	34936.8	1.13717e+09	21487.4	34782.6	1.23874e+06	4.133e+06
MA06A0148	KC18-5-41	K feldspar		18.7031	0.0363742	15.9235	0.0334626	38.3288	0.0910729			90.7463	64715.9	1.22931e+06	1.03458e+06	2.50107e+06	1.94792	1.2842	1.01497e+08	104188	6.00075e+08	3.36098e+07	121997	9.47535e+08	13912	15392.2	1.02964e+06	1.11208e+07
MA06A0008	KC22-4-01	K feldspar		16.81	0.0871743	15.5182	0.0775515	36.4722	0.165767			174.379	30654.4	523468	478601	1.12989e+06	244.564	3060.72	1.9409e+08	30831.7	1.10661e+09	6.97759e+07	5198.14	1.98579e+09	15270.6	14682.8	1.75514e+06	8.98998e+06
MA06A0009	KC22-4-02-alb	plagioclase		17.0739	0.0813921	15.459	0.0720872	36.347	0.200161			94.5004	11493.4	199352	178758	422184	6.68676	3.40136	7.49086e+08	6059.99	9.17533e+08	4.39675e+07	35279	2.76309e+07	450908	10067	2.02141e+06	69993.9
MA06A0010	KC22-4-03	K feldspar		16.651	0.0319882	15.4795	0.0330606	36.5139	0.067779			114.123	53225.4	900341	828907	1.96408e+06	2154.42	2311.87	8.72627e+07	50159.3	8.58738e+08	5.11134e+07	5503.07	1.49243e+09	18072.9	102956	4.86834e+06	9.92476e+06
MA06A0011	KC22-4-04	K feldspar		16.8312	0.0393466	15.5388	0.0351618	37.8354	0.110171			170.687	53689	918036	839319	2.05289e+06	140624	4134.7	1.67017e+08	712522	1.37053e+09	8.90057e+07	149221	2.64159e+09	60062.8	187920	4.37663e+07	9.09524e+06
MA06A0012	KC22-4-05-alb	plagioclase		16.6586	0.0845237	15.4462	0.0780471	36.3109	0.205492			88.6211	9803.99	165924	152351	359769	873.907	2558.92	5.08166e+08	161199	1.08501e+09	3.86621e+07	10882.4	2.04779e+07	1.12919e+06	306727	1.38149e+07	590472
MA06A0013	KC22-4-06	K feldspar		17.2569	0.0259407	15.5055	0.0422292	37.4303	0.0499649			88.4316	40539.2	710750	632377	1.53349e+06	6.67867	28.2754	8.83068e+07	151859	1.01823e+09	6.14086e+07	12925.6	1.81078e+09	21726.1	15256.5	3.26074e+06	3.02677e+07
MA06A0014	KC22-4-07	K feldspar		17.8094	0.162702	16.082	0.156801	38.517	0.420073			114.005	2239.02	40513.1	36225	87155.2	1451.09	2865.75	4.3787e+08	1.45045e+07	1.4099e+09	5.22982e+07	58811	8.60589e+08	213255	258617	1.20207e+08	1.13296e+07
MA06A0015	KC22-4-08	K feldspar		17.7705	0.0247825	15.6547	0.0391931	38.359	0.0858832			146.684	69718.2	1.25876e+06	1.09798e+06	2.70268e+06	238.492	156.225	1.90183e+08	22100.7	1.12448e+09	7.02455e+07	3760.4	1.94244e+09	12252.4	18285.8	5.5058e+06	2.53003e+06
MA06A0016	KC22-4-09	K feldspar		17.8606	0.0417025	15.5766	0.0356811	37.65	0.0726041			70.4083	36642.6	664948	574194	1.39422e+06	402.112	60.2276	1.80601e+08	125300	1.0526e+09	6.65093e+07	144715	1.84179e+09	34032.4	36573.2	4.78303e+06	1.30309e+07
MA06A0017	KC22-4-10	K feldspar		17.5279	0.0199281	15.5799	0.0250859	38.4582	0.0421702			35.4784	55137.9	981967	864196	2.14299e+06	6.31929	154.298	2.48371e+08	216203	1.10054e+09	6.58558e+07	19740.8	1.696e+09	120842	38430.2	2.07221e+06	2.47789e+07
MA06A0018	KC22-4-11	K feldspar		17.1577	0.0345634	15.5722	0.0271314	37.6326	0.0729275			44.6603	86872	1.51448e+06	1.36088e+06	3.30387e+06	1.7184	2.13414	1.69347e+08	172588	1.00045e+09	6.12129e+07	160481	1.71233e+09	43840.9	40571.1	1.22558e+06	9.75965e+06
MA06A0020	KC22-4-13-alb	K feldspar		15.6431	0.0395123	15.0045	0.0409389	34.6675	0.0699846			77.5794	16126.7	256336	243414	564995	80.6435	129.976	1.39012e+08	195764	1.0677e+09	6.69393e+07	26101.9	1.86954e+09	30472.8	7685.31	2.56707e+06	1.3591e+07
MA06A0021	KC22-4-14	K feldspar		16.6714	0.0553114	15.5001	0.0656509	36.4781	0.160526			135.635	24628.3	417213	384012	907912	271.149	355.923	3.47609e+08	65267.6	1.15337e+09	7.0912e+07	4448.72	1.69927e+09	59147.9	27875.6	2.86337e+06	9.62552e+06
MA06A0022	KC22-4-15	K feldspar		16.6698	0.0307602	15.4887	0.0328234	36.3498	0.0582435			160.834	72987.3	1.23634e+06	1.13719e+06	2.68117e+06	27.9102	31.6797	2.19161e+08	144833	1.08011e+09	6.34308e+07	152818	1.66189e+09	53945.6	24311.7	6.6294e+06	1.67014e+07
MA06A0024	KC22-4-17-grains	K feldspar		17.013	0.0712928	15.4948	0.0777136	36.8512	0.19287			74.3847	24656.2	426267	384303	918228	132129	45628.9	2.07134e+07	2.78324e+07	6.27758e+08	1.04515e+08	42722.4	1.11595e+09	10137.8	1.23029e+06	1.92339e+08	3.02248e+06
MA06A0025	KC22-4-18	K feldspar		17.7454	0.0957461	15.6891	0.0723031	38.4667	0.160671			126.507	56200.7	1.01347e+06	886945	2.18473e+06	153.257	222.373	1.84852e+08	654332	1.08849e+09	6.90457e+07	7915.04	1.97585e+09	26711.3	105516	1.65242e+07	1.95809e+07
MA06A0026	KC22-4-19	K feldspar		16.7085	0.0381577	15.3659	0.0343084	36.4445	0.111067			114.269	47893.9	813220	740267	1.76393e+06	2985.13	1067.87	1.37745e+08	135637	1.07808e+09	6.68606e+07	403609	1.94309e+09	17887.7	91855	4.35521e+06	1.19742e+07
MA06A0027	KC22-4-20	K feldspar		16.7859	0.0323741	15.4814	0.0362593	36.4569	0.0880345			88.1377	65049.6	1.10965e+06	1.01298e+06	2.39658e+06	49.276	169.189	1.05867e+08	33645.5	1.09584e+09	6.8895e+07	424503	2.10926e+09	15111.8	34074.7	1.51084e+06	2.57564e+06
MA06A0028	KC22-4-21	K feldspar		17.052	0.0449054	15.6056	0.0408756	36.5446	0.0828113			108.439	42901.3	743447	673428	1.58438e+06	58.5864	104.566	2.21987e+08	809715	1.111e+09	6.77452e+07	888238	1.84797e+09	17304.3	59080.2	6.13662e+06	2.09584e+06
MA06A0029	KC22-4-22	plagioclase		17.2242	0.109569	15.5607	0.0878422	36.3035	0.204792			52.4457	19895.6	348262	311402	729909	2.87356	21.2644	7.50647e+08	39843.8	9.29803e+08	4.34373e+07	26903.4	2.20489e+07	490595	5685.09	2.07612e+06	214006
MA06A0030	KC22-4-23 - alb	K feldspar		16.4998	0.101742	15.1682	0.0943154	35.4949	0.223878			77.5452	7015.35	117638	107032	251638	6327.52	958.787	3.47062e+08	1.1774e+06	1.12239e+09	6.86549e+07	7360.91	1.66184e+09	71838.4	11946.4	1.52407e+07	9.25543e+06
MA06A0031	KC22-4-24	K feldspar		16.8974	0.097245	15.3659	0.0846005	36.2286	0.207847			84.634	7428.48	127569	114811	271963	135.922	175.741	7.85826e+07	102148	1.102e+09	7.0858e+07	32513.1	2.2416e+09	50259.3	9896.2	8.08254e+06	8.96687e+06
MA06A0033	KC22-4-26	K feldspar		17.4832	0.0638941	15.8121	0.0627012	37.5307	0.184342			15.3348	14095	250452	224166	534572	7703.79	1796.56	5.19164e+08	1.06533e+06	9.4837e+08	5.59668e+07	12313.2	7.56759e+08	279185	19460.8	2.29957e+07	1.78756e+07
MA06A0055	KC22-6-02	K feldspar		17.844	0.0374247	15.7171	0.0479201	38.3496	0.08282			105.407	76054.4	1.37962e+06	1.20195e+06	2.94687e+06	33.3573	1003.04	3.94545e+08	772253	9.46025e+08	5.80275e+07	228920	1.28435e+09	58204.2	84849.9	7.73202e+06	3.37311e+06
MA06A0056	KC22-6-03	K feldspar		17.6153	0.0389502	15.7516	0.0385166	38.1468	0.0982843			97.29	59400.5	1.06372e+06	940802	2.28939e+06	156.582	306.39	1.65272e+08	197712	9.23449e+08	5.44761e+07	110669	1.51185e+09	44806.5	91792.4	1.77071e+06	1.37691e+07
MA06A0057	KC22-6-04	K feldspar		16.9361	0.0461274	15.5909	0.0505269	36.7826	0.116463			27.3785	18334	315660	287414	681343	160	971.349	9.42671e+07	1.02691e+07	9.7747e+08	5.77909e+07	5426.4	1.71186e+09	17233.8	52332.6	1.99177e+08	1.56058e+07
MA06A0058	KC22-6-05	K feldspar		16.8628	0.0574719	15.5669	0.0330801	36.7058	0.0768074			80.1238	20722.2	355236	324347	768477	664.408	1051.47	1.49029e+08	715071	9.69564e+08	5.86744e+07	2126.03	1.68761e+09	14489.4	20576.5	1.51221e+07	1.29875e+07
MA06A0059	KC22-6-06-alb	plagioclase		17.1943	0.0567838	15.5863	0.0441283	36.7754	0.140547			65.4125	20593.2	359965	322725	765132	247.19	237.033	6.62837e+08	1.18134e+06	8.93535e+08	3.92941e+07	10656	5.05696e+07	528060	2636.7	7.01122e+06	421777
MA06A0060	KC22-6-07	K feldspar		17.6276	0.0364708	15.7364	0.0223753	38.332	0.0584857			81.8689	49407.9	885412	781741	1.91341e+06	35.863	46.591	2.7128e+08	67451	8.63874e+08	5.07633e+07	9404.61	1.20278e+09	86945.4	71940.3	6.53194e+06	2.22439e+07
MA06A0061	KC22-6-08	K feldspar		18.1449	0.0745054	15.7769	0.0185123	38.3183	0.0421279			105.014	54598.6	1.00715e+06	866081	2.11365e+06	31450.1	33308.2	1.12301e+08	635005	9.05622e+08	5.43709e+07	299308	1.58811e+09	15751.1	46107	4.88174e+06	4.11883e+06
MA06A0062	KC22-6-09	K feldspar		16.7282	0.0492327	15.5354	0.0248062	36.7214	0.0819238			114.236	40411.5	687249	631210	1.49922e+06	674.502	219.338	2.17377e+08	55173.9	8.95478e+08	5.36964e+07	345890	1.39107e+09	57812.2	115124	1.4334e+06	4.91213e+06
MA06A0065	KC22-6-12	K feldspar		17.7151	0.0557183	15.6913	0.0516853	38.0362	0.147386			41.3677	20661.6	372110	325950	793933	965.205	2533.6	2.28987e+08	23745.5	6.69337e+08	3.70479e+07	7232.22	8.06145e+08	78033.8	266501	1.59845e+07	9.00611e+06
MA06A0066	KC22-6-13	K feldspar		16.9712	0.042958	15.5027	0.0445517	37.7576	0.110758			103.457	29801.6	514184	464485	1.13674e+06	10000.3	7196.71	2.91184e+08	461107	8.29066e+08	4.65252e+07	9115.56	1.04532e+09	70965.6	49169.7	6.37466e+06	1.75179e+07
MA06A0068	KC22-6-15	K feldspar		16.8072	0.0603619	15.4977	0.0376631	37.8576	0.0992962			40.4329	84772.5	1.44849e+06	1.32078e+06	3.24201e+06	114933	11216.5	8.03235e+07	119307	1.00329e+09	6.10365e+07	28204.6	1.8834e+09	33661.8	73586.4	3.74016e+07	2.06164e+07
MA06A0069	KC22-6-16	K feldspar		17.5466	0.0443199	15.6563	0.042193	38.1033	0.129469			91.3639	99375.6	1.77272e+06	1.56413e+06	3.82509e+06	39.5209	84.5797	8.31239e+07	10484.2	8.5358e+08	5.08822e+07	7589.02	1.54729e+09	9467.49	18068.1	1.08578e+06	8.08465e+06
MA06A0070	KC22-6-17	K feldspar		16.6092	0.0457872	15.4681	0.0485157	36.4013	0.151987			99.6678	26872.2	453756	417866	988126	274.112	472.646	3.18601e+08	21808.2	9.17476e+08	5.63399e+07	5938.3	1.3705e+09	29950.1	96445.1	1.16583e+07	2.33602e+07
MA06A0071	KC22-6-18	K feldspar		16.6599	0.0754464	15.472	0.0631193	36.4264	0.108658			67.4482	24785.7	419800	385512	912018	166.806	334.446	2.54705e+08	18893.7	9.87386e+08	6.23532e+07	6071.53	1.66073e+09	26667.7	75177.9	9.68476e+06	1.02988e+07
MA06A0072	KC22-6-19	K feldspar		16.7207	0.0437158	15.552	0.0480058	36.9197	0.101431			116.883	43293	735940	676844	1.61457e+06	113.815	141.11	2.88533e+08	397970	1.03679e+09	6.39566e+07	269418	1.68322e+09	36276.9	192251	3.18264e+07	1.14393e+07
MA06A0073	KC22-6-20	K feldspar		17.9049	0.0204915	15.7149	0.0208942	38.1728	0.064785			126.634	44095.1	802660	696594	1.70027e+06	447.888	631.171	1.37488e+08	42731.1	7.24892e+08	4.34656e+07	4502.55	1.19624e+09	20375.6	49958.9	2.25733e+06	1.18316e+07
MA06A0074	KC22-6-21	K feldspar		17.4825	0.0331908	15.6241	0.0252751	38.114	0.0547618			112.309	57704.6	1.02561e+06	906311	2.22158e+06	5813.01	2011.21	1.43998e+08	136633	9.58664e+08	5.87402e+07	39863.9	1.68169e+09	35278.7	146960	3.85378e+06	2.16394e+07
MA06A0075	KC22-6-22	K feldspar		17.7736	0.0411563	15.6868	0.0451891	38.3456	0.0588107			76.1186	48719.3	880332	768247	1.88702e+06	21.9515	114.857	1.3664e+08	13143.5	9.61629e+08	6.15679e+07	4142.86	1.88434e+09	12820.3	24000	7.12799e+06	3.36824e+06
MA06A0076	KC22-6-23	K feldspar		16.8074	0.0386496	15.5677	0.0282236	36.7593	0.0609503			91.9185	44724.1	764207	699881	1.66059e+06	2198.81	1622.73	1.62261e+08	46415	8.42944e+08	5.06745e+07	11482.3	1.44798e+09	29642.6	173968	6.09059e+06	1.03731e+07
MA06A0077	KC22-6-24	K feldspar		16.6553	0.0585752	15.4616	0.043293	36.3011	0.0894388			67.5295	14068.6	238218	218655	515844	23.7598	90.3561	1.46373e+08	10215.9	8.85803e+08	5.29799e+07	3047.02	1.52478e+09	10583.4	15291.5	3.36961e+06	1.81011e+07
MA06A0078	KC22-6-25	K feldspar		17.4678	0.0338505	15.7195	0.0271124	39.3132	0.0664558			71.2729	33554.2	595872	530190	1.33237e+06	1441.58	280.68	8.60891e+07	47332.2	7.66112e+08	4.45464e+07	45409.5	1.32575e+09	21573.8	27809	568013	2.98618e+07
MA06A0079	KC22-6-26-alb	K feldspar		18.161	0.0381243	15.6971	0.0278742	38.2489	0.0637004			91.705	48285.3	891501	761856	1.86538e+06	6874.86	2457.91	1.76933e+08	241946	8.36347e+08	5.15535e+07	32694.5	1.44347e+09	16477.1	20887.9	1.00131e+07	1.15464e+07
MA06A0080	KC22-6-27	K feldspar		17.0157	0.0366506	15.5877	0.0223007	37.3733	0.0713178			35.4155	62870.7	1.08759e+06	985062	2.3732e+06	1115.08	201.179	1.01853e+08	55711.8	8.04468e+08	4.70329e+07	196207	1.37836e+09	13198.4	52373.1	487118	1.73332e+07
MA06A0087	KC22-6-29	K feldspar		17.6648	0.0329996	15.6467	0.0210177	39.4923	0.116033			75.829	120687	2.16733e+06	1.89788e+06	4.8133e+06	58.824	115.275	9.43025e+07	83806.4	8.6535e+08	5.18381e+07	137799	1.59675e+09	26650.6	52809	997775	1.72315e+07
MA06A0088	KC22-6-30	K feldspar		17.042	0.0531974	15.5534	0.044933	37.9193	0.0948887			34.7218	48071.3	832838	751431	1.84081e+06	1383.1	2218.37	1.43208e+08	102875	7.36395e+08	4.16682e+07	4890.28	1.14984e+09	25343.5	41299.8	9.56682e+06	2.09214e+07
MA06A0089	KC22-6-31	K feldspar		17.0097	0.042356	15.5194	0.0269222	37.8981	0.0889168			88.9159	60089.1	1.03907e+06	937220	2.29968e+06	2128.84	2780.94	1.18599e+08	56865.2	7.84844e+08	4.56381e+07	6017.94	1.31485e+09	24458.1	61288.2	4.66029e+06	2.6443e+07
MA06A0090	KC22-6-32	K feldspar		17.5749	0.0492229	15.6524	0.0403485					44.8894	113599	2.02963e+06	1.78698e+06	4.55937e+06	41.6634	74.8347	1.11062e+08	137095	8.73672e+08	5.41504e+07	347898	1.68507e+09	25176.4	84471.1	1.09437e+06	1.32796e+07
MA06A0091	KC22-6-33	K feldspar		17.2395	0.0422594	15.5653	0.0350428	37.598	0.0643187			88.9389	37471.3	656706	586156	1.42266e+06	21.8531	18.8162	1.19704e+08	23068.6	8.26684e+08	4.92437e+07	4472.04	1.42758e+09	24283	26785.3	1.5127e+06	1.86886e+07
MA06A0092	KC22-6-34	K feldspar		17.4345	0.0309567	15.5487	0.035252	38.0138	0.108191			43.1618	29987.4	531487	468579	1.15109e+06	49.2133	568.029	5.89328e+07	33031.9	9.54712e+08	6.0887e+07	5510.68	2.00179e+09	5493.34	39917.1	2.5625e+06	4.13627e+06
MA06A0093	KC22-6-35	K feldspar		16.6998	0.033024	15.5482	0.0370075	36.5952	0.0639592			88.893	21958.5	372782	343103	811424	4.6875	1.17187	1.75504e+08	4567.41	7.00692e+08	4.06427e+07	2973.75	1.06821e+09	22951.2	28082.1	4.4666e+06	1.06151e+07
MA06A0094	KC22-6-36	K feldspar		17.9435	0.0252531	15.6935	0.0259383					44.4065	156193	2.8491e+06	2.4633e+06	6.38507e+06	8324.04	2851.16	9.3514e+07	377017	8.99353e+08	5.46229e+07	117717	1.67602e+09	13724	26125.9	2.2778e+06	2.11225e+06
MA06A0095	KC22-6-37	K feldspar		17.9176	0.0411166	15.7571	0.0350915	37.3992	0.106369			39.3534	67066.6	1.22157e+06	1.06197e+06	2.53263e+06	5840.26	705.105	6.7639e+07	35996.5	7.68314e+08	4.61575e+07	48879.8	1.46362e+09	13334	16830.9	382370	7.84783e+06
MA06A0096	KC22-6-38	K feldspar		17.943	0.05312	15.792	0.0340333	37.4856	0.0943706			53.8498	69551.2	1.26862e+06	1.10373e+06	2.63247e+06	466.096	945.024	6.01324e+07	29637.4	8.86303e+08	5.45008e+07	150856	1.72855e+09	26192.9	19828.1	401742	9.70173e+06
MA06A0097	KC22-6-39	K feldspar		17.6631	0.0516322	15.7075	0.0440176	38.2248	0.160421			103.982	34061.5	611585	537632	1.3146e+06	8955.62	2652.38	3.6069e+08	188867	8.72065e+08	5.27699e+07	5693.8	1.19396e+09	26464.6	37942.9	8.66238e+06	9.82964e+06
MA06A0099	KC22-6-41	K feldspar		17.7985	0.0945819	15.798	0.0805608	38.6724	0.199529			51.9541	19745.7	357253	313455	770975	2427.29	1279.05	4.40035e+08	179554	7.12258e+08	4.20137e+07	7094.76	6.65235e+08	62997.2	47473.5	4.15528e+06	5.70805e+06
MA06A0101	KC22-6-43	K feldspar		17.6155	0.0324029	15.7329	0.0190056	38.3193	0.0609994			142.755	38815.1	695035	613616	1.50165e+06	35.6195	597.304	7.94597e+07	8859.16	7.47388e+08	4.37105e+07	2259.02	1.33128e+09	9735.17	18856.2	3.71285e+06	5.98322e+06

## Sheet: DR Table 2D Standards
DR Table 2D. Glass standards
See Appendix DR1 for a detailed description of the Pb isotope analytical method and Table DR1 for sample descriptions and references.
Filename	Name	Mineral		Spot Size	Frequ	207/206	+/-1s	208/206	+/-1s	206/204	+/-1s	207/204	+/-1s	208/204	+/-1s	CPS->	Hg202	Pb204	Pb206	Pb207	Pb208	Th232	U238
FE15B0233	BCR-2g	Glass	110µm	10Hz	Spot	0.8282	0.002	2.0541	0.005	18.7082	0.074	15.4935	0.075	38.4291	0.153		4646	5460	104216	86543	217093	263870	87419
JN07A108	BCR-2g	Glass	110µm	10Hz	Spot	0.8286	0.002	2.059	0.004	18.898	0.092	15.65	0.074	38.996	0.224		3059	6314	121345	101969	253667	314265	103717
AU22A138	BCR-2g	Glass	110µm	10Hz	Line	0.828698	0.00149043	2.04991	0.00638935	18.627	0.125798	15.4558	0.116713	38.2804	0.276792		1808	6512	123283	102492	256946	320598	103082
FE15B0407	BCR-2g	Glass	110µm	10Hz	Spot	0.8293	0.003	2.0581	0.007	18.8115	0.125	15.6009	0.078	38.715	0.205		2099	5230	100283	83395	208575	255369	84139
MA06A0083	BCR-2g	Glass	105µm	10Hz	Line	0.82935	0.00250594	2.05821	0.00267021	18.7145	0.0834652	15.5208	0.0612269	38.5183	0.179292		33.1574	5873.15	111741	91621.6	228476	247554	83343.8
MA06A0189	BCR-2g	Glass	105µm	10Hz	Line	0.829451	0.00220036	2.06526	0.0035142	18.9192	0.102104	15.6926	0.104111	39.0731	0.209099		77.4707	5246.48	100669	82584.2	206378	211722	68985.5
AU10A072	BCR-2g	Glass	110µm	10Hz	Line	0.830352	0.00160938	2.06959	0.00583352	18.6464	0.115548	15.5015	0.109271	38.6044	0.267297		1723	5304	100456	83832	211066	253915	83712
AU10A227	BCR-2g	Glass	110µm	10Hz	Line	0.830378	0.00164573	2.06395	0.00381305	18.7253	0.0876997	15.5675	0.0756676	38.6621	0.140012		827	4897	93177	77969	195732	246567	78144
FE15B0408	BCR-2g	Glass	110µm	10Hz	Spot	0.8304	0.003	2.0612	0.007	18.7394	0.091	15.562	0.079	38.6253	0.253		1748	5138	98159	81738	204462	251427	83681
JN07A107	BCR-2g	Glass	110µm	10Hz	Spot	0.8305	0.002	2.0593	0.004	18.715	0.084	15.534	0.087	38.624	0.23		3432	6356	120987	101898	252960	309606	101676
AU10A006	BCR-2g	Glass	110µm	10Hz	Line	0.830546	0.00217733	2.06372	0.00431754	18.6118	0.110805	15.4764	0.100588	38.4237	0.217979		2774	5014	95062	79122	198780	253700	81868
MA06A0004	BCR-2g	Glass	105µm	10Hz	Line	0.830581	0.0019772	2.05873	0.00655441	18.6643	0.0857922	15.5022	0.078038	38.4247	0.139981		107.108	6156.12	116709	96018.7	239056	254125	85834.6
AU10A150	BCR-2g	Glass	110µm	10Hz	Line	0.83066	0.00218	2.06139	0.00556445	18.8015	0.099328	15.6363	0.0600283	38.7713	0.160457		944	4611	87948	73572	184351	231693	74255
AU10A111	BCR-2g	Glass	110µm	10Hz	Line	0.830741	0.00298264	2.06078	0.00692805	18.7915	0.110314	15.6295	0.0714716	38.7393	0.166193		1132	5172	98614	82433	206499	251593	82536
AU10A043	BCR-2g	Glass	110µm	10Hz	Line	0.830876	0.00185911	2.06362	0.00413621	18.7194	0.0882733	15.572	0.0906347	38.6437	0.221365		1982	5299	100851	84120	211117	253310	82483
AU22A086	BCR-2g	Glass	110µm	10Hz	Line	0.830893	0.00292655	2.05891	0.00804923	18.8755	0.0638805	15.7034	0.0926671	38.9612	0.217294		2506	6621	127118	105752	265408	326176	107060
AU22A087	BCR-2g	Glass	110µm	10Hz	Line	0.830966	0.00282444	2.04133	0.00914962	18.8966	0.0845221	15.7223	0.0804121	38.6715	0.241703		2321	6386	122757	102134	254116	312291	101849
FE15B0281	BCR-2g	Glass	110µm	10Hz	Spot	0.831	0.002	2.059	0.005	18.5468	0.126	15.4116	0.119	38.1877	0.264		3035	5632	106488	88733	222178	272275	91937
AU22A004	BCR-2g	Glass	110µm	10Hz	Line	0.83105	0.00151177	2.06036	0.00375441	18.7722	0.0461231	15.6205	0.0577642	38.7757	0.152111		4719	5787	110954	92641	232999	289054	91751
MA06A0190	BCR-2g	Glass	105µm	10Hz	Line	0.831136	0.00212028	2.05981	0.00356386	18.9682	0.108694	15.7652	0.0742878	39.071	0.211374		50.4591	5342.31	102768	84479.9	210127	220130	72378.6
AU10A149	BCR-2g	Glass	110µm	10Hz	Line	0.831394	0.00159877	2.06305	0.00290569	18.7207	0.114416	15.5828	0.0899097	38.6358	0.228535		1063	4741	90054	75400	188916	239146	75758
MA06A0037	BCR-2g	Glass	105µm	10Hz	Line	0.831398	0.0022404	2.05964	0.00510434	18.6379	0.0595854	15.4955	0.0432156	38.3872	0.115757		22.7283	6133.63	116192	95590.5	237929	248555	82060.9
MY24A154	BCR-2g	Glass	110µm	10Hz	Spot	0.8316	0.003	2.0605	0.004	18.761	0.075	15.535	0.091	38.486	0.174		1698	5952	110830	94887	232831	278411	91397
SE12A139	BCR-2g	Glass	110µm	10Hz	line	0.8317	0.0025	2.054	0.008	18.73	0.06	15.58	0.04	38.63	0.13		1738	6709	128462	108709	269515	316374	103665
FE15B0379	BCR-2g	Glass	110µm	10Hz	Spot	0.8318	0.001	2.0578	0.005	18.7789	0.092	15.6207	0.099	38.6441	0.224		2207	5578	106767	89056	222188	263908	88975
FE15B0194	BCR-2g	Glass	110µm	10Hz	Spot	0.8319	0.002	2.0499	0.006	18.7181	0.116	15.572	0.092	38.3695	0.206		7243	5158	98589	82237	205055	252209	82867
AU10A073	BCR-2g	Glass	110µm	10Hz	Line	0.832004	0.00244568	2.07099	0.00513662	18.6346	0.0775289	15.5225	0.081679	38.606	0.147839		1530	5306	100414	83967	211126	255066	84292
AU22A047	BCR-2g	Glass	110µm	10Hz	Line	0.832416	0.00233454	2.05232	0.0054918	18.8134	0.0607272	15.6805	0.0818738	38.7091	0.192346		2883	6547	125478	104646	261408	320732	103080
AU22A137	BCR-2g	Glass	110µm	10Hz	Line	0.832479	0.00144319	2.05716	0.00381964	18.611	0.0899329	15.5129	0.0666964	38.3827	0.159481		1947	6237	117980	98524	246741	308421	97175
JN07A004	BCR-2g	Glass	110µm	10Hz	Spot	0.8326	0.002	2.0554	0.005	18.752	0.091	15.605	0.092	38.628	0.253		9693	5816	111531	94420	233757	294512	93898
AU22A048	BCR-2g	Glass	110µm	10Hz	Line	0.832687	0.00181656	2.05995	0.00484427	18.7913	0.102503	15.6671	0.0925262	38.8072	0.233876		2756	6185	118410	98780	247587	318377	101280
SE12A085	BCR-2g	Glass	110µm	10Hz	line	0.8328	0.007	2.042	0.013	18.71	0.12	15.58	0.12	38.36	0.18		1979	6750	129186	109150	268953	319677	109471
AU22A003	BCR-2g	Glass	110µm	10Hz	Line	0.832881	0.0018722	2.05102	0.0044153	18.6825	0.138597	15.5801	0.0919228	38.4152	0.24593		5891	5738	109509	91645	228951	283318	89563
JN07A074	BCR-2g	Glass	110µm	10Hz	Spot	0.8329	0.001	2.0499	0.004	18.94	0.136	15.766	0.109	38.91	0.239		4366	6535	126071	106360	262513	304409	101080
MA06A0036	BCR-2g	Glass	105µm	10Hz	Line	0.832943	0.00194908	2.05734	0.00615154	19.122	0.0630748	15.9275	0.0586622	39.3403	0.0847097		104.996	6013.52	116874	96332.9	239063	258476	87054.9
SE12A003	BCR-2g	Glass	110µm	10Hz	line	0.833	0.0024	2.056	0.003	18.77	0.1	15.64	0.08	38.77	0.2		3166	6664	128293	108904	269558	308100	100924
AU10A044	BCR-2g	Glass	110µm	10Hz	Line	0.833279	0.00208392	2.06133	0.00514295	18.7576	0.11243	15.6489	0.0958203	38.6796	0.231171		1919	4950	94409	78977	197418	242016	78254
JN07A040	BCR-2g	Glass	110µm	10Hz	Spot	0.8334	0.001	2.0569	0.004	18.802	0.112	15.66	0.094	38.758	0.291		5533	6342	121671	102787	254574	315419	103190
SE12A043	BCR-2g	Glass	110µm	10Hz	line	0.8334	0.0019	2.059	0.002	18.58	0.11	15.49	0.1	38.41	0.23		2499	6528	124188	105110	260792	317264	103216
MA06A0003	BCR-2g	Glass	105µm	10Hz	Line	0.833572	0.00214225	2.06309	0.00568143	18.7003	0.0564252	15.588	0.0776449	38.5803	0.173175		152.176	5841.61	110957	91618.8	227761	243454	79371.6
MY24A112	BCR-2g	Glass	110µm	10Hz	Spot	0.8336	0.001	2.0617	0.004	18.833	0.114	15.634	0.097	38.656	0.191		2432	5987	111769	95733	234636	297271	96890
MY24A076	BCR-2g	Glass	110µm	10Hz	Spot	0.8337	0.002	2.0711	0.004	18.799	0.063	15.607	0.071	38.762	0.11		2817	6170	114823	98434	242298	301721	99573
AU10A110	BCR-2g	Glass	110µm	10Hz	Line	0.833978	0.0020494	2.06761	0.0048166	18.6879	0.117591	15.6039	0.10588	38.6533	0.241268		1329	5175	98129	82345	206160	253071	82852
AU10A184	BCR-2g	Glass	110µm	10Hz	Line	0.834255	0.00157515	2.0673	0.00420343	18.6223	0.0915341	15.5543	0.0942519	38.5121	0.236835		911	4799	90694	76233	190747	239222	76523
AU10A185	BCR-2g	Glass	110µm	10Hz	Line	0.834333	0.00220877	2.0688	0.00382583	18.8791	0.137236	15.7702	0.105597	39.0713	0.235922		901	4596	88063	74029	185348	230478	73660
MY24A004	BCR-2g	Glass	110µm	10Hz	Spot	0.8345	0.004	2.0627	0.005	18.987	0.11	15.778	0.129	38.992	0.215		5141	6062	113639	98348	240279	292865	93743
SE12A138	BCR-2g	Glass	110µm	10Hz	line	0.8345	0.0032	2.058	0.005	18.53	0.03	15.47	0.07	38.31	0.11		1821	7085	134231	113964	282246	330695	110995
FE15B0444	BCR-2g	Glass	110µm	10Hz	Spot	0.8347	0.003	2.0669	0.005	18.4289	0.099	15.3822	0.079	38.0909	0.15		1552	4757	89404	74824	186569	236143	76521
SE12A004	BCR-2g	Glass	110µm	10Hz	line	0.8347	0.0018	2.055	0.004	18.7	0.15	15.62	0.12	38.61	0.29		2797	6615	126868	107911	266477	313228	104869
SE12A044	BCR-2g	Glass	110µm	10Hz	line	0.8349	0.0022	2.063	0.002	18.56	0.08	15.5	0.07	38.45	0.17		2369	6377	121199	102754	255002	318962	102673
AU10A005	BCR-2g	Glass	110µm	10Hz	Line	0.835404	0.00217125	2.07171	0.00357742	18.7003	0.118381	15.641	0.0874753	38.7558	0.221643		3148	4935	94033	78719	197382	246207	78918
MY24A040	BCR-2g	Glass	110µm	10Hz	Spot	0.8358	0.002	2.065	0.004	18.748	0.07	15.603	0.06	38.543	0.14		3772	6151	114003	98280	240394	302102	97669
FE15B0335	BCR-2g	Glass	110µm	10Hz	Spot	0.836	0.001	2.0582	0.003	18.5964	0.084	15.5459	0.08	38.2759	0.191		2472	5770	109358	91674	227845	267318	90382
SE12A084	BCR-2g	Glass	110µm	10Hz	line	0.8369	0.0011	2.064	0.004	18.76	0.11	15.71	0.09	38.89	0.19		1916	7072	135719	115244	285629	339050	113443
MA06A0128	BCR-2g	Glass	105µm	10Hz	Line	0.837454	0.00175116	2.0552	0.00347969	18.8084	0.0882232	15.7511	0.0816866	38.655	0.183725		108.617	5359.89	102434	84790.4	209034	222379	72955.3
						0.832735	Wtd Mean (from internal errs)	2.06054	Wtd Mean (from internal errs)	18.7222	Wtd Mean (from internal errs)	15.5973	Wtd Mean (from internal errs)	38.6527	Wtd Mean (from internal errs)
						0.000593432	95%-conf. err. of mean	0.00138971	95%-conf. err. of mean	0.0370443	95%-conf. err. of mean	0.0279064	95%-conf. err. of mean	0.0794901	95%-conf. err. of mean
						1.50999	MSWD	1.55727	MSWD	2.81002	MSWD	1.72653	MSWD	2.7363	MSWD
		BCR-2g GeoReM values:				0.833	0.001			18.765	0.007	15.626	0.006	38.73	0.02
	difference values- recommended values					-0.000265274				-0.0427953		-0.0286505		-0.0772695
AU10A229	GSD-1g	Glass	74µm	10Hz	Spot	0.800301	0.0023845	1.98152	0.00651635	19.5771	0.0759223	15.6861	0.0518479	38.8065	0.140755		373	9124	181514	146387	366075	583466	683121
AU22A006	GSD-1g	Glass	74µm	10Hz	Spot	0.801471	0.00275663	1.97697	0.00653143	19.5151	0.0888834	15.6607	0.0938273	38.6784	0.239721		2018	10997	219161	176445	441486	717244	832391
MA06A0192	GSD-1g	Glass	67µm	10Hz	Line	0.801608	0.00128961	1.98456	0.00308692	19.7308	0.0948149	15.8164	0.0673217	39.1569	0.163426		5.50535	11385.3	227802	180617	448761	673952	808068
JN07A073	GSD-1g	Glass	74µm	10Hz	Spot	0.8018	0.002	1.9788	0.004	19.689	0.088	15.777	0.068	39.047	0.18		1858	12324	247168	200728	496839	763018	931350
MA06A0191	GSD-1g	Glass	67µm	10Hz	Line	0.801997	0.00130721	1.98585	0.00271479	19.7209	0.0648634	15.8161	0.0568164	39.1627	0.138025		84.5022	11281.8	225628	178976	444766	673444	795139
AU22A089	GSD-1g	Glass	74µm	10Hz	Spot	0.802015	0.00215932	1.98154	0.00583473	19.5726	0.0481321	15.7174	0.0484587	38.882	0.164524		1035	12413	247121	198445	496587	785778	963493
MA06A0006	GSD-1g	Glass	67µm	10Hz	Line	0.80243	0.00099882	1.98512	0.00285339	19.5401	0.0361461	15.6795	0.0361723	38.7894	0.0508909		152.382	13940.6	276705	219919	546486	822378	973803
AU10A108	GSD-1g	Glass	74µm	10Hz	Spot	0.802791	0.00208798	1.98688	0.00452167	19.6957	0.057731	15.8304	0.0548907	39.1472	0.165823		523	9344	186757	150849	377023	623418	717937
AU22A050	GSD-1g	Glass	74µm	10Hz	Spot	0.802836	0.00204089	1.97976	0.00299198	19.7159	0.0846913	15.8487	0.0838523	39.1316	0.158328		1244	11928	239556	192664	481341	746280	909964
AU22A135	GSD-1g	Glass	74µm	10Hz	Spot	0.802867	0.00381128	1.97216	0.00536245	19.6339	0.0725826	15.7835	0.0828723	38.8194	0.183215		939	12446	248350	199991	497843	788822	938754
AU10A183	GSD-1g	Glass	74µm	10Hz	Spot	0.803041	0.00263758	1.98877	0.00604962	19.5884	0.101764	15.749	0.0742354	38.971	0.166322		409	9250	183899	148791	372077	638173	711540
AU10A228	GSD-1g	Glass	74µm	10Hz	Spot	0.803052	0.00268502	1.9884	0.00823729	19.5637	0.110138	15.7293	0.0668035	38.9145	0.175091		382	10567	210082	170009	425157	702409	825460
MY24A153	GSD-1g	Glass	74µm	10Hz	Spot	0.8031	0.002	1.9873	0.004	19.579	0.087	15.658	0.056	38.738	0.146		235	11968	232579	192289	471212	762047	909528
AU22A088	GSD-1g	Glass	74µm	10Hz	Spot	0.803105	0.00228373	1.98709	0.00355536	19.4965	0.0598093	15.6775	0.0489676	38.8392	0.115337		1041	11958	237143	190690	477867	764989	919812
FE15B0280	GSD-1g	Glass	74µm	10Hz	Spot	0.8032	0.001	1.985	0.005	19.5788	0.095	15.7261	0.067	38.8647	0.152		1415	12995	259402	208935	521789	962287	1104656
AU10A041	GSD-1g	Glass	74µm	10Hz	Spot	0.803358	0.00179419	1.98417	0.00372516	19.5755	0.058462	15.7449	0.0570115	38.8553	0.153839		828	9793	194935	157196	392335	679096	740727
AU10A004	GSD-1g	Glass	74µm	10Hz	Spot	0.80341	0.00206999	1.98347	0.00436219	19.5395	0.0756998	15.717	0.0821327	38.7701	0.184207		1231	9669	192490	154964	386831	658011	737654
SE12A005	GSD-1g	Glass	74µm	10Hz	line	0.8035	0.0012	1.981	0.003	19.68	0.1	15.82	0.08	39.15	0.18		1086	11526	232568	190396	470767	743028	892542
FE15B0334	GSD-1g	Glass	74µm	10Hz	Spot	0.8036	0.002	1.9877	0.003	19.5957	0.079	15.7479	0.059	38.9495	0.174		1131	12964	258914	208654	520955	930536	1105589
AU10A147	GSD-1g	Glass	74µm	10Hz	Spot	0.803679	0.00269087	1.99223	0.00597756	19.6551	0.059653	15.8153	0.0664657	39.1719	0.162785		526	9535	190131	153879	385154	618218	737821
MY24A003	GSD-1g	Glass	74µm	10Hz	Spot	0.8037	0.001	1.9819	0.003	19.718	0.061	15.781	0.054	38.907	0.135		2209	11389	221708	184824	450478	733535	849805
JN07A106	GSD-1g	Glass	74µm	10Hz	Spot	0.8038	0.003	1.9807	0.007	19.555	0.097	15.71	0.08	38.817	0.211		1460	12357	245775	200326	494238	774821	919673
AU10A003	GSD-1g	Glass	74µm	10Hz	Spot	0.803815	0.00208912	1.98804	0.00325501	19.5267	0.0726062	15.7146	0.0396214	38.834	0.0987303		1437	9712	193245	155642	389229	641137	726565
FE15B0193	GSD-1g	Glass	74µm	10Hz	Spot	0.8039	0.001	1.9811	0.003	19.4966	0.063	15.6733	0.043	38.6238	0.127		3337	11509	229143	184700	460605	871305	976742
MY24A111	GSD-1g	Glass	74µm	10Hz	Spot	0.8041	0.002	1.9941	0.005	19.685	0.077	15.762	0.063	39.081	0.168		1021	11816	230553	190472	468128	771181	902602
MY24A039	GSD-1g	Glass	74µm	10Hz	Spot	0.8044	0.001	1.9883	0.004	19.745	0.076	15.815	0.066	39.085	0.147		1556	12140	236974	196636	481175	769397	918407
AU10A070	GSD-1g	Glass	74µm	10Hz	Spot	0.80441	0.00360067	1.98517	0.0056425	19.5309	0.142396	15.7296	0.105642	38.7862	0.221484		621	8486	168353	136094	339275	548231	622140
MA06A0039	GSD-1g	Glass	67µm	10Hz	Line	0.804445	0.00140732	1.98479	0.00245713	19.5639	0.0563959	15.7381	0.0259665	38.8302	0.100082		72.8625	12548.4	249527	198619	492373	742131	878408
MA06A0038	GSD-1g	Glass	67µm	10Hz	Line	0.804448	0.00140926	1.98124	0.0033633	19.6281	0.0625947	15.7897	0.0480738	38.8879	0.0946012		33.4904	13709.1	273499	217707	538722	823440	979865
SE12A046	GSD-1g	Glass	74µm	10Hz	line	0.8045	0.0021	1.979	0.006	19.58	0.07	15.75	0.06	38.9	0.12		731	13706	274720	224423	554416	852251	1082400
AU10A148	GSD-1g	Glass	74µm	10Hz	Spot	0.804507	0.00136006	1.98611	0.00457709	19.6945	0.0735474	15.8633	0.0685161	39.1297	0.139253		429	8516	170150	137852	343623	526725	644403
JN07A003	GSD-1g	Glass	74µm	10Hz	Spot	0.8046	0.002	1.9827	0.003	19.489	0.067	15.672	0.07	38.726	0.143		4457	11351	226254	185114	457458	708474	830458
MA06A0084	GSD-1g	Glass	67µm	10Hz	Line	0.804721	0.00212147	1.9792	0.00461035	19.5941	0.0722124	15.7677	0.0460937	38.7806	0.0772419		59.5772	12680.7	252598	200964	496652	741723	890126
FE15B0445	GSD-1g	Glass	74µm	10Hz	Spot	0.8048	0.002	1.9894	0.002	19.6024	0.041	15.7767	0.039	38.9966	0.075		720	12081	241525	194909	485098	867537	1051213
SE12A137	GSD-1g	Glass	74µm	10Hz	line	0.8048	0.0023	1.974	0.003	19.56	0.08	15.74	0.07	38.78	0.15		603	13881	277559	227225	559735	843071	1059826
AU22A005	GSD-1g	Glass	74µm	10Hz	Spot	0.804828	0.00130631	1.98166	0.00291574	19.5243	0.0738261	15.7337	0.0653629	38.7886	0.159207		2092	10151	202424	163667	408791	666775	752487
AU10A071	GSD-1g	Glass	74µm	10Hz	Spot	0.804995	0.00156144	1.99298	0.0037525	19.4032	0.0667262	15.6381	0.0495945	38.6843	0.128562		703	10992	216622	175248	438278	754477	862351
SE12A045	GSD-1g	Glass	74µm	10Hz	line	0.805	0.0014	1.981	0.004	19.6	0.11	15.78	0.11	39	0.26		758	10672	214160	175060	432777	656220	766082
JN07A105	GSD-1g	Glass	74µm	10Hz	Spot	0.8051	0.003	1.9877	0.004	19.608	0.053	15.776	0.06	39.06	0.119		1402	11302	225412	184004	454902	696292	834877
SE12A006	GSD-1g	Glass	74µm	10Hz	line	0.8052	0.0013	1.982	0.003	19.54	0.06	15.74	0.07	38.89	0.11		998	12172	243872	200032	493843	779200	948609
AU22A049	GSD-1g	Glass	74µm	10Hz	Spot	0.805203	0.00162623	1.98544	0.00386357	19.5582	0.07317	15.7683	0.0636819	38.93	0.150476		1221	12828	255576	206161	515031	832725	982154
SE12A136	GSD-1g	Glass	74µm	10Hz	line	0.8054	0.0038	1.975	0.006	19.59	0.06	15.78	0.07	38.87	0.11		668	13240	265205	217261	535088	798151	990605
FE15B0232	GSD-1g	Glass	74µm	10Hz	Spot	0.8055	0.002	1.9883	0.004	19.5963	0.059	15.7841	0.055	38.9639	0.089		2107	12736	254653	205673	513485	963984	1081437
MA06A0005	GSD-1g	Glass	67µm	10Hz	Line	0.805513	0.00113394	1.986	0.00178428	19.4957	0.0642015	15.704	0.0471766	38.7183	0.134248		126.179	13042.1	258276	206068	510326	791605	922820
MA06A0129	GSD-1g	Glass	67µm	10Hz	Line	0.805527	0.00163984	1.98812	0.00285879	19.6774	0.0666687	15.8506	0.0502113	39.1209	0.11778		45.108	12244.4	244813	194920	483271	714009	859315
FE15B0378	GSD-1g	Glass	74µm	10Hz	Spot	0.8057	0.002	1.9917	0.003	19.6147	0.068	15.8031	0.062	39.0673	0.121		1028	12621	252302	203836	508201	915977	1081681
AU10A182	GSD-1g	Glass	74µm	10Hz	Spot	0.805829	0.00243403	1.99164	0.00259169	19.533	0.0768727	15.759	0.0647307	38.9168	0.136593		389	8615	170788	138662	346044	572825	655730
AU10A042	GSD-1g	Glass	74µm	10Hz	Spot	0.806058	0.00358891	1.9856	0.00781822	19.4557	0.119431	15.7011	0.118763	38.6452	0.204671		810	11514	227789	184315	458801	747201	889459
JN07A039	GSD-1g	Glass	74µm	10Hz	Spot	0.8062	0.002	1.9802	0.004	19.561	0.088	15.761	0.057	38.818	0.147		2603	12248	244467	199797	492434	744003	911886
MY24A075	GSD-1g	Glass	74µm	10Hz	Spot	0.8073	0.001	1.9897	0.003	19.574	0.07	15.735	0.047	38.774	0.155		1182	11256	218117	181063	442201	724571	838882
AU22A136	GSD-1g	Glass	74µm	10Hz	Spot	0.807306	0.00194632	1.98514	0.00340093	19.6855	0.0763294	15.9124	0.0794645	39.1775	0.176613		891	12446	249001	201638	502478	799395	949466
SE12A087	GSD-1g	Glass	74µm	10Hz	line	0.8074	0.0033	1.981	0.005	19.43	0.09	15.7	0.04	38.66	0.15		619	13909	276517	226529	558483	828286	1072027
SE12A086	GSD-1g	Glass	74µm	10Hz	line	0.8076	0.0016	1.986	0.003	19.66	0.07	15.88	0.07	39.21	0.16		753	11405	229321	187898	464474	671928	834894
AU10A109	GSD-1g	Glass	74µm	10Hz	Spot	0.80891	0.00164969	1.99603	0.00683442	19.5688	0.0934941	15.8483	0.0651451	39.0742	0.143634		582	11782	233961	190422	474505	819953	946309
						0.804321	Wtd Mean (from internal errs)	1.98505	Wtd Mean (from internal errs)	19.5899	Wtd Mean (from internal errs)	15.7485	Wtd Mean (from internal errs)	38.8977	Wtd Mean (from internal errs)
						0.00044587	2-sigma err. of mean	0.00119652	95%-conf. err. of mean	0.0187378	2-sigma err. of mean	0.0152905	2-sigma err. of mean	0.0348845	2-sigma err. of mean
						0.997752	MSWD	1.54567	MSWD	1.15424	MSWD	1.0286	MSWD	1.28577	MSWD
		GSD-1g GeoReM values:				0.80418	0.0001			19.579	0.004	15.745	0.002	38.908	0.009
	difference values- recommended values					0.000141245				0.0108532		0.00352075		-0.0103001
